# Supplementary material
Source: PubMed Central journal article supplement (PMC7765337)
Supplement: NIHMS1652514-supplement-Supplementary_Figures.pdf [file NIHMS1652514-supplement-Supplementary_Figures.pdf]

## SUPPLEMENTARY FIGURES

**Figure S1.** Heatmaps presenting the rate ratio comparing precipitant exposed time vs. precipitant unexposed time.

A

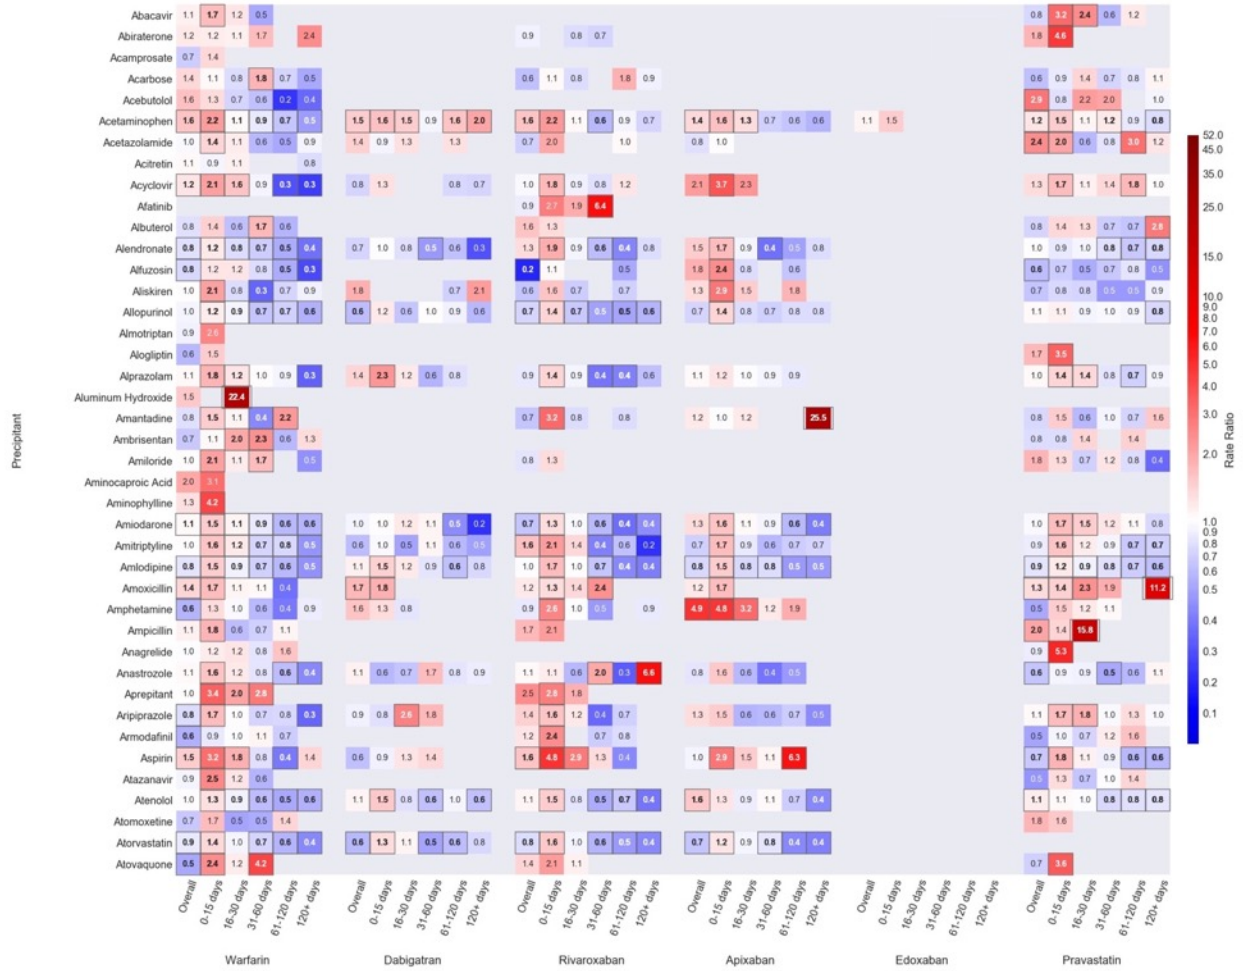

Precipitants are listed alphabetically. Rate ratios highlighted with bold text and a dark grey box are statistically significant ( $p < 0.05$ ). Panel A includes precipitants from abacavir to atovaquone.

Figure S1. Continued.

B

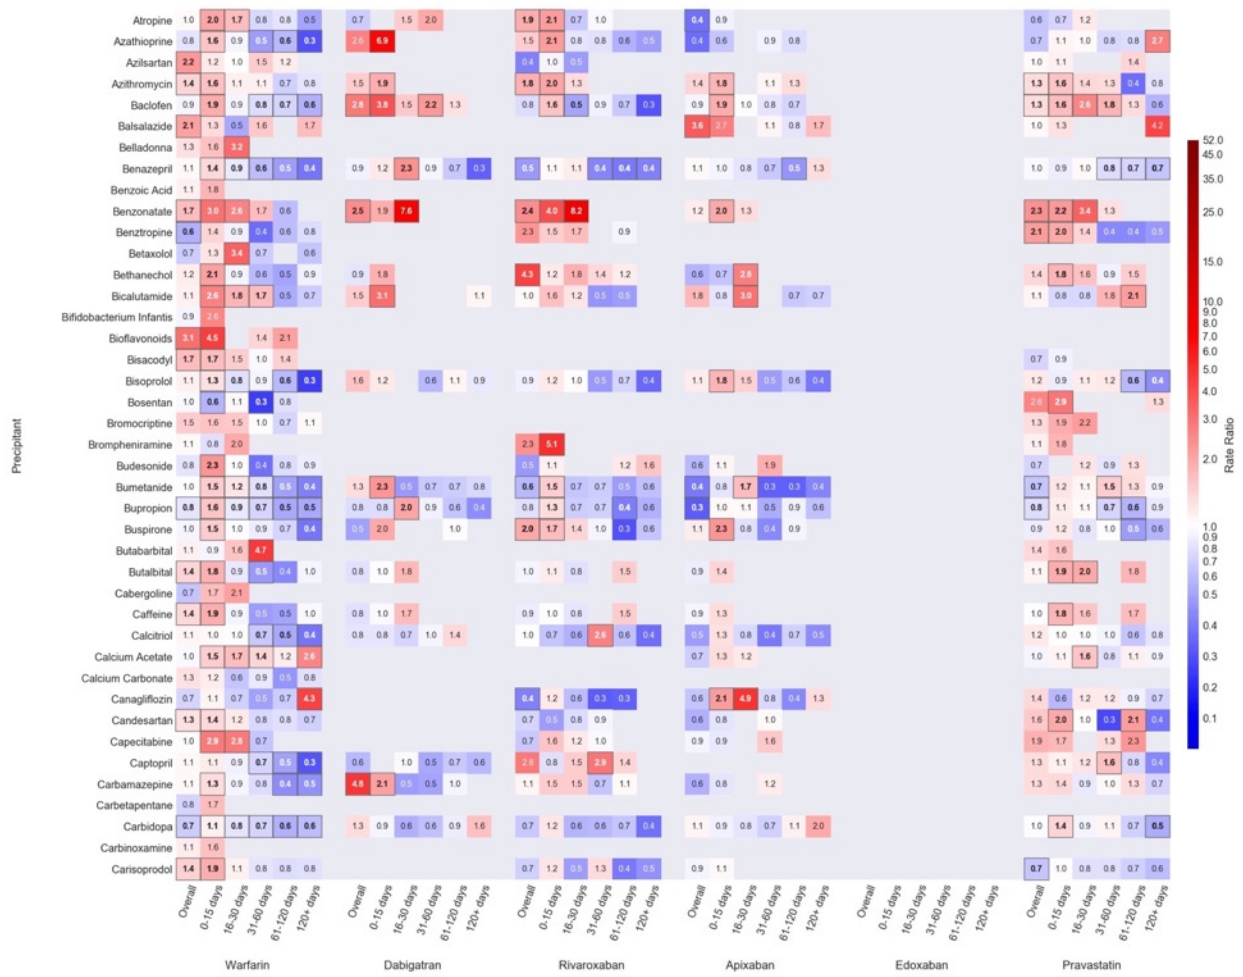

Precipitants are listed alphabetically. Rate ratios highlighted with bold text and a dark grey box are statistically significant (p < 0.05). Panel B includes precipitants from atropine to carisoprodol.

Figure S1. Continued.

C

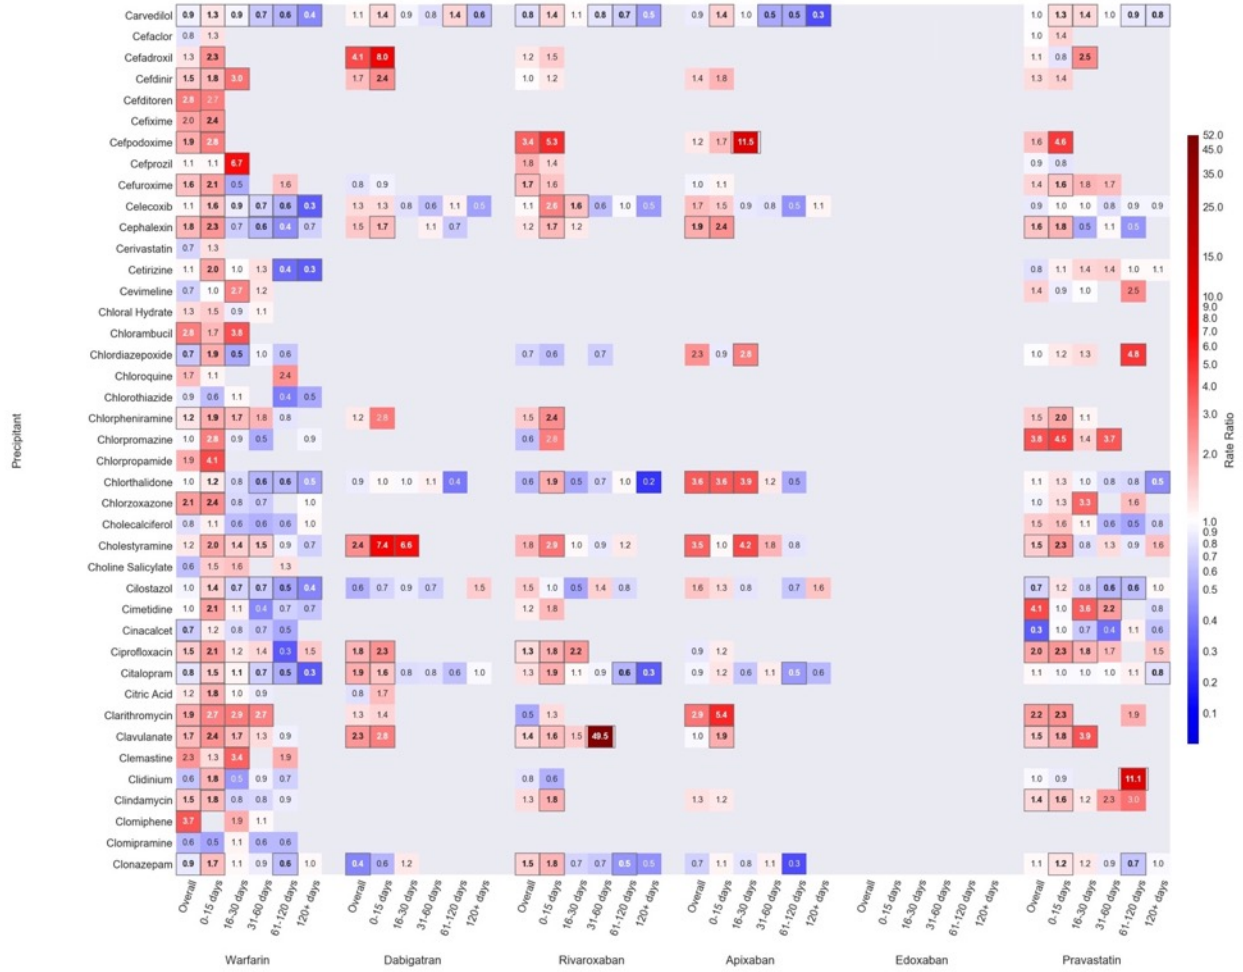

Precipitants are listed alphabetically. Rate ratios highlighted with bold text and a dark grey box are statistically significant ( $p < 0.05$ ). Panel C includes precipitants from carvedilol to clonazepam.

Figure S1. Continued.

D

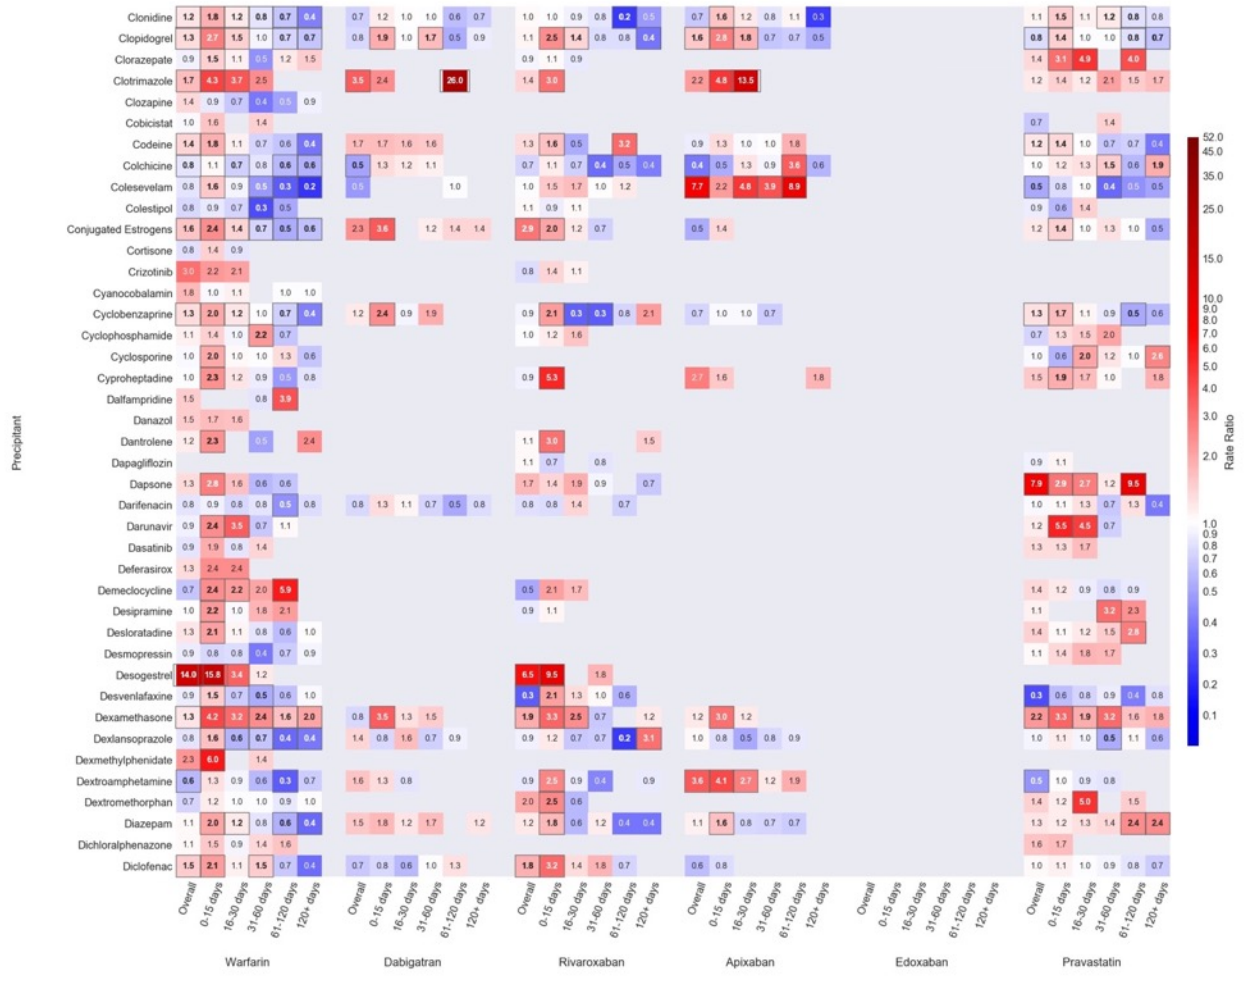

Precipitants are listed alphabetically. Rate ratios highlighted with bold text and a dark grey box are statistically significant (p < 0.05). Panel D includes precipitants from clonidine to diclofenac.

Figure S1. Continued.

E

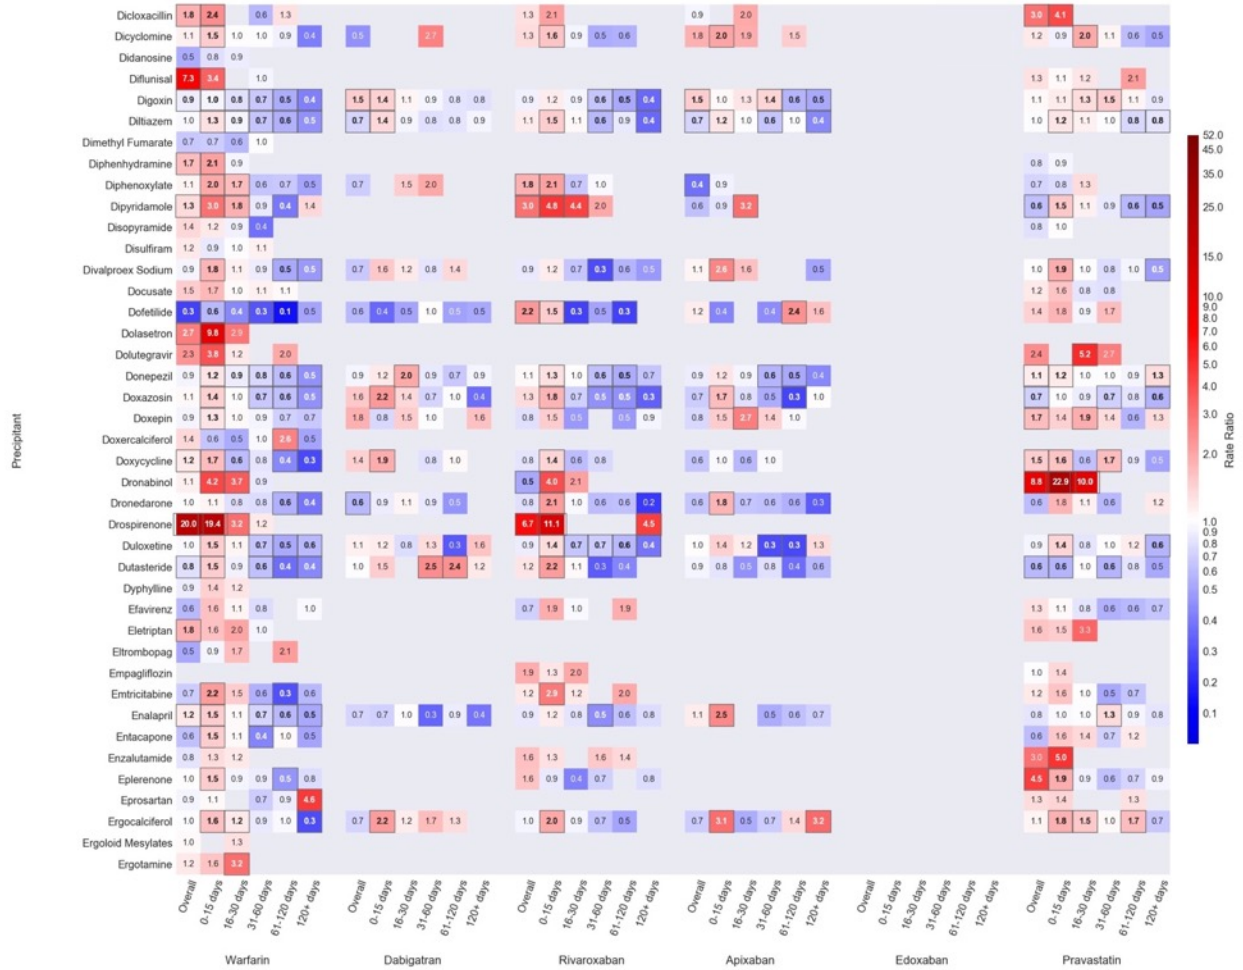

Precipitants are listed alphabetically. Rate ratios highlighted with bold text and a dark grey box are statistically significant (p < 0.05). Panel E includes precipitants from dicloxacillin to ergotamine.

Figure S1. Continued.

F

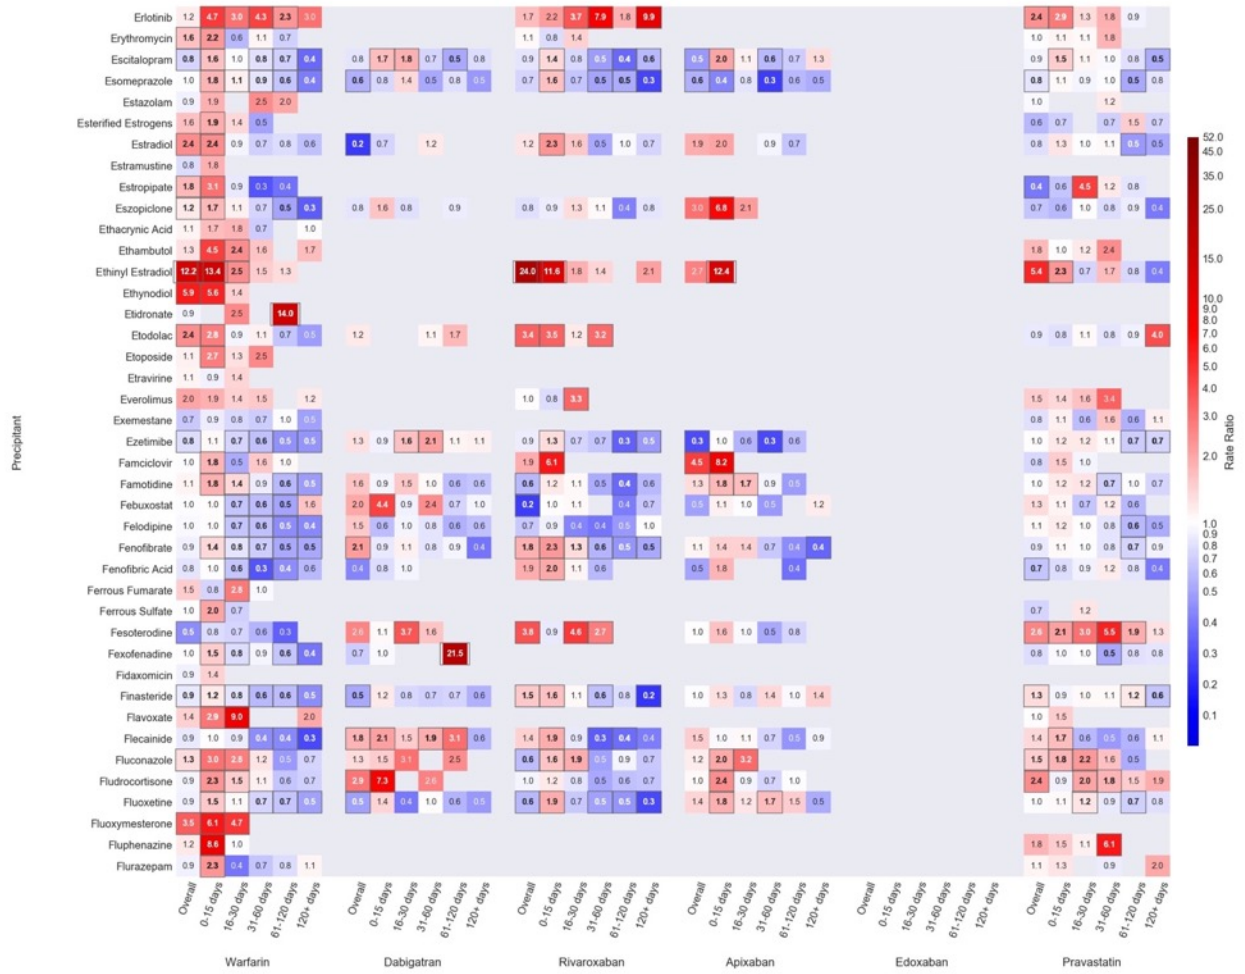

Precipitants are listed alphabetically. Rate ratios highlighted with bold text and a dark grey box are statistically significant ( $p < 0.05$ ). Panel F includes precipitants from erlotinib to flurazepam.

Figure S1. Continued.

G

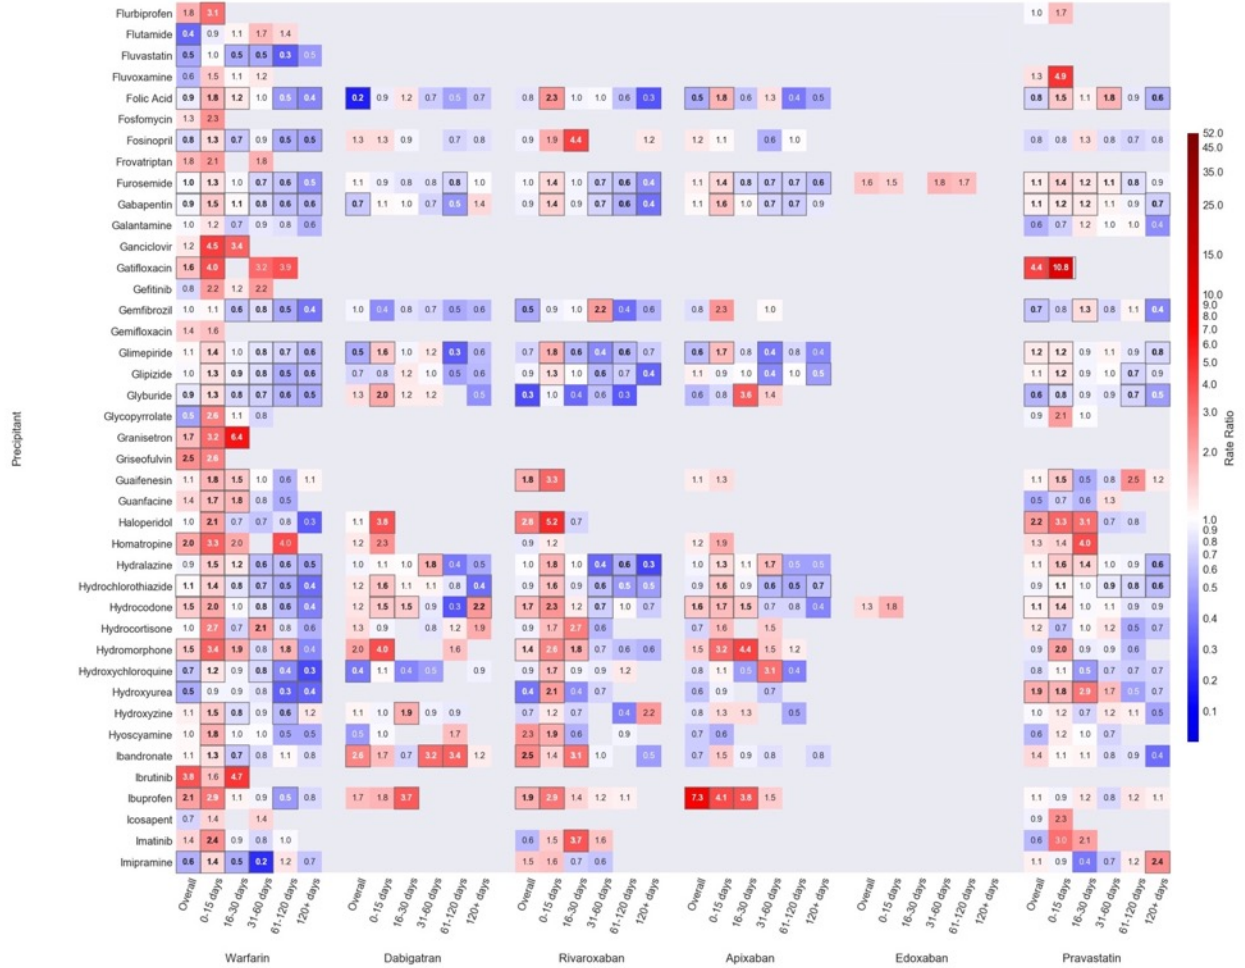

Precipitants are listed alphabetically. Rate ratios highlighted with bold text and a dark grey box are statistically significant ( $p < 0.05$ ). Panel G includes precipitants from flurbiprofen to imipramine.

Figure S1. Continued.

H

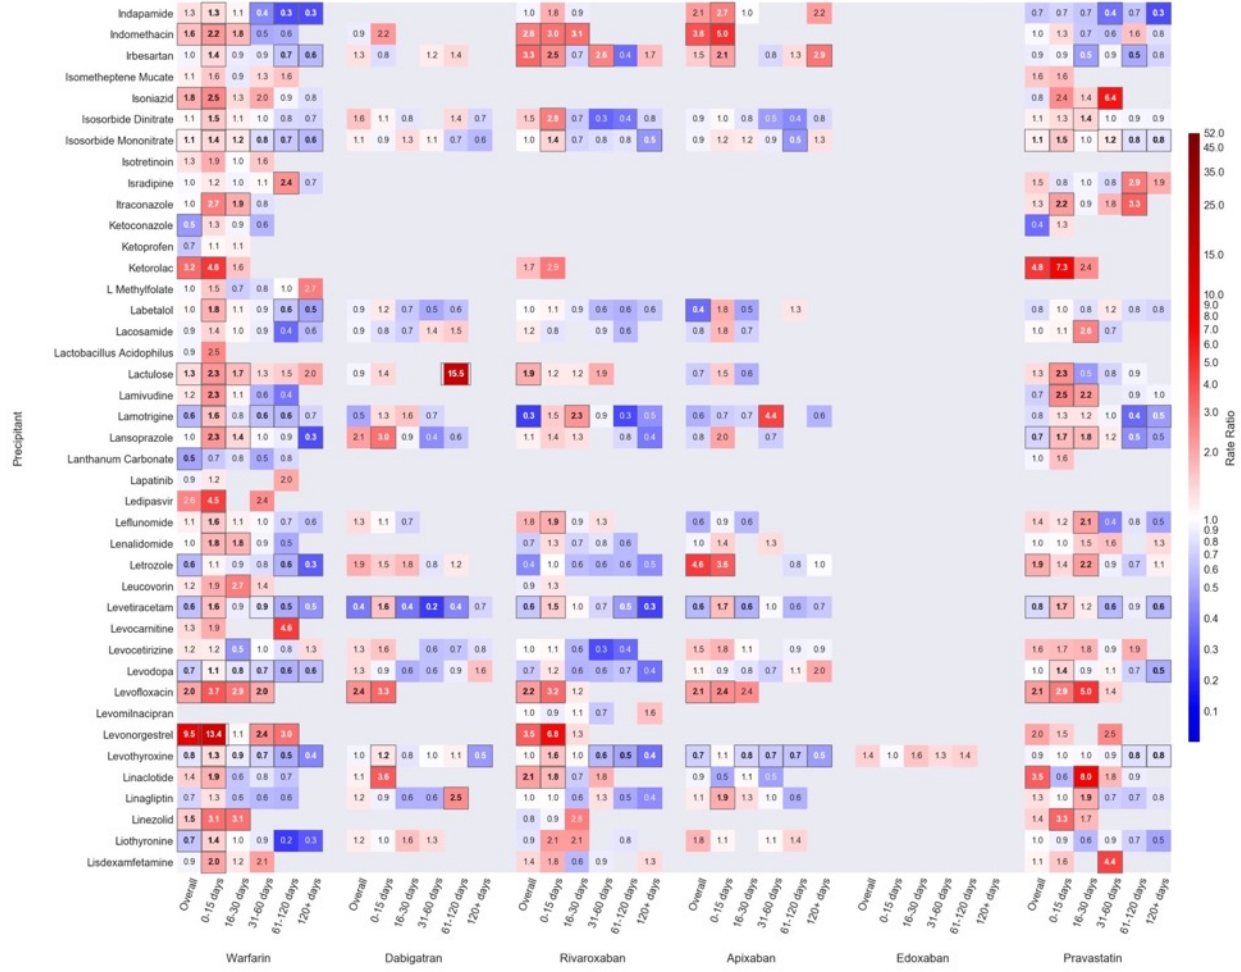

Precipitants are listed alphabetically. Rate ratios highlighted with bold text and a dark grey box are statistically significant ( $p < 0.05$ ). Panel H includes precipitants from indapamide to lisdexamfetamine.



Figure S1. Continued.

I

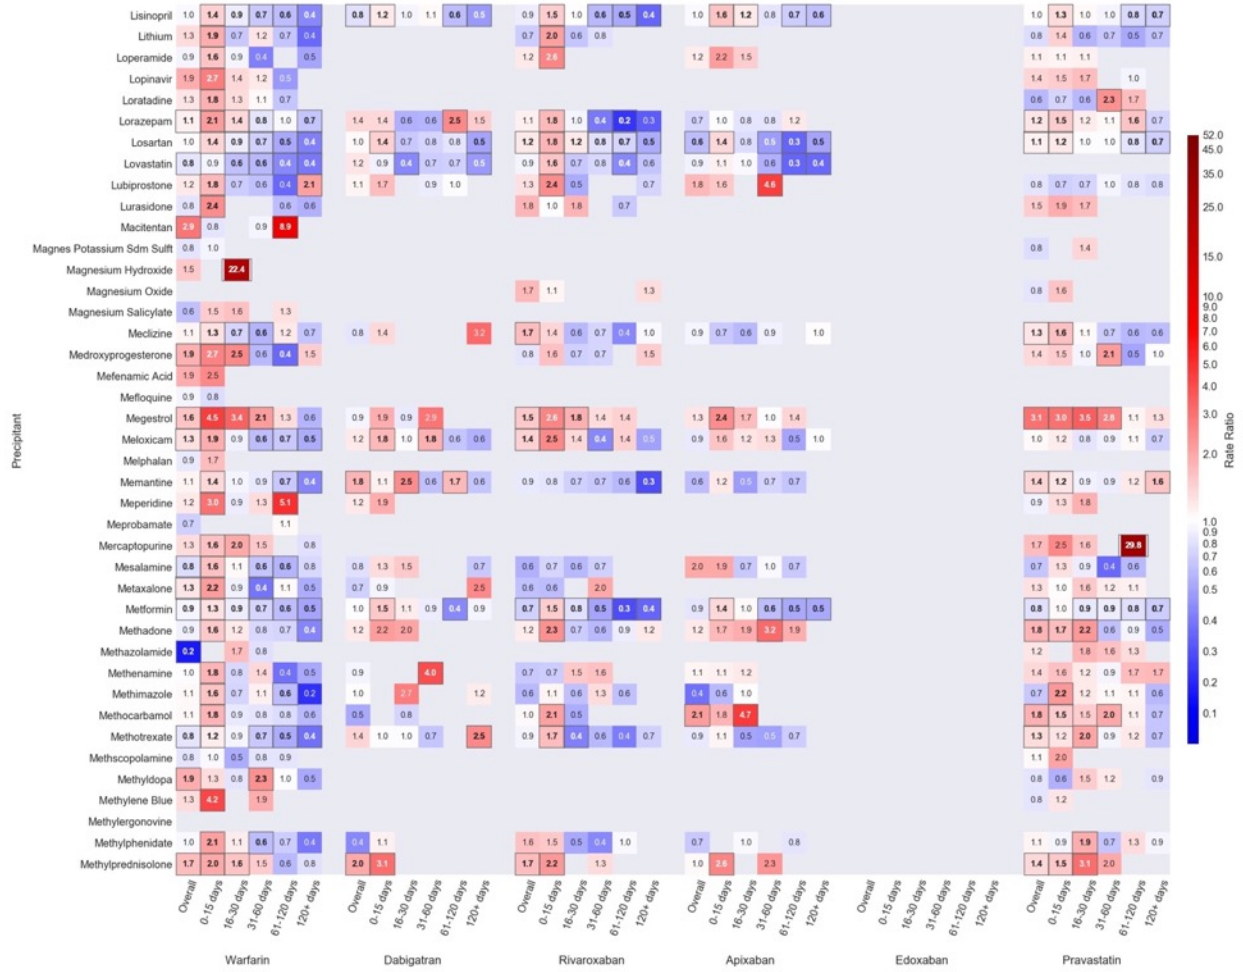

Precipitants are listed alphabetically. Rate ratios highlighted with bold text and a dark grey box are statistically significant (p < 0.05). Panel I includes precipitants from lisinopril to methylprednisolone.

Figure S1. Continued.

J

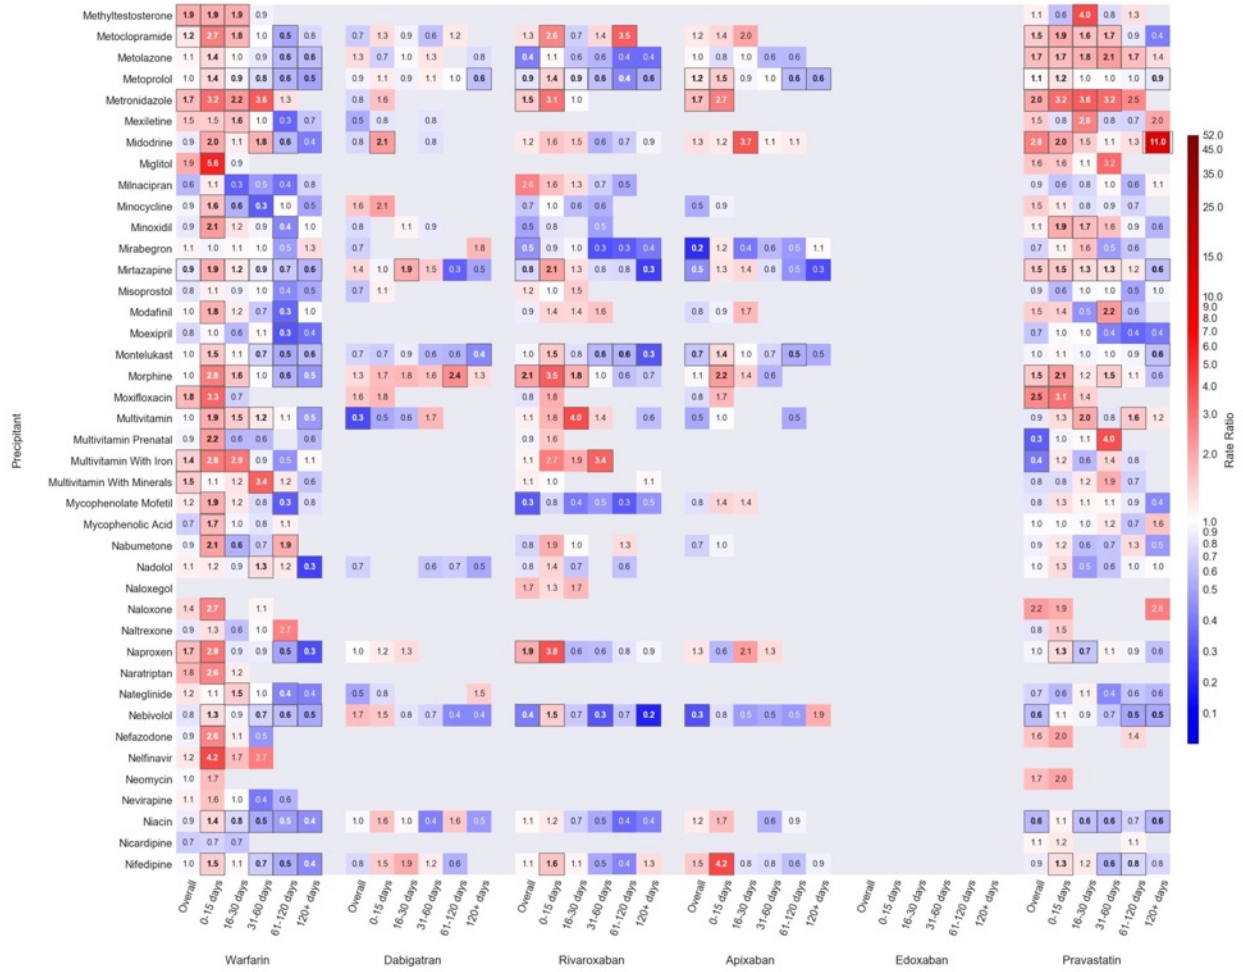

Precipitants are listed alphabetically. Rate ratios highlighted with bold text and a dark grey box are statistically significant (p<0.05). Panel J includes precipitants from methyltestosterone to nifedipine.

Figure S1. Continued.

K

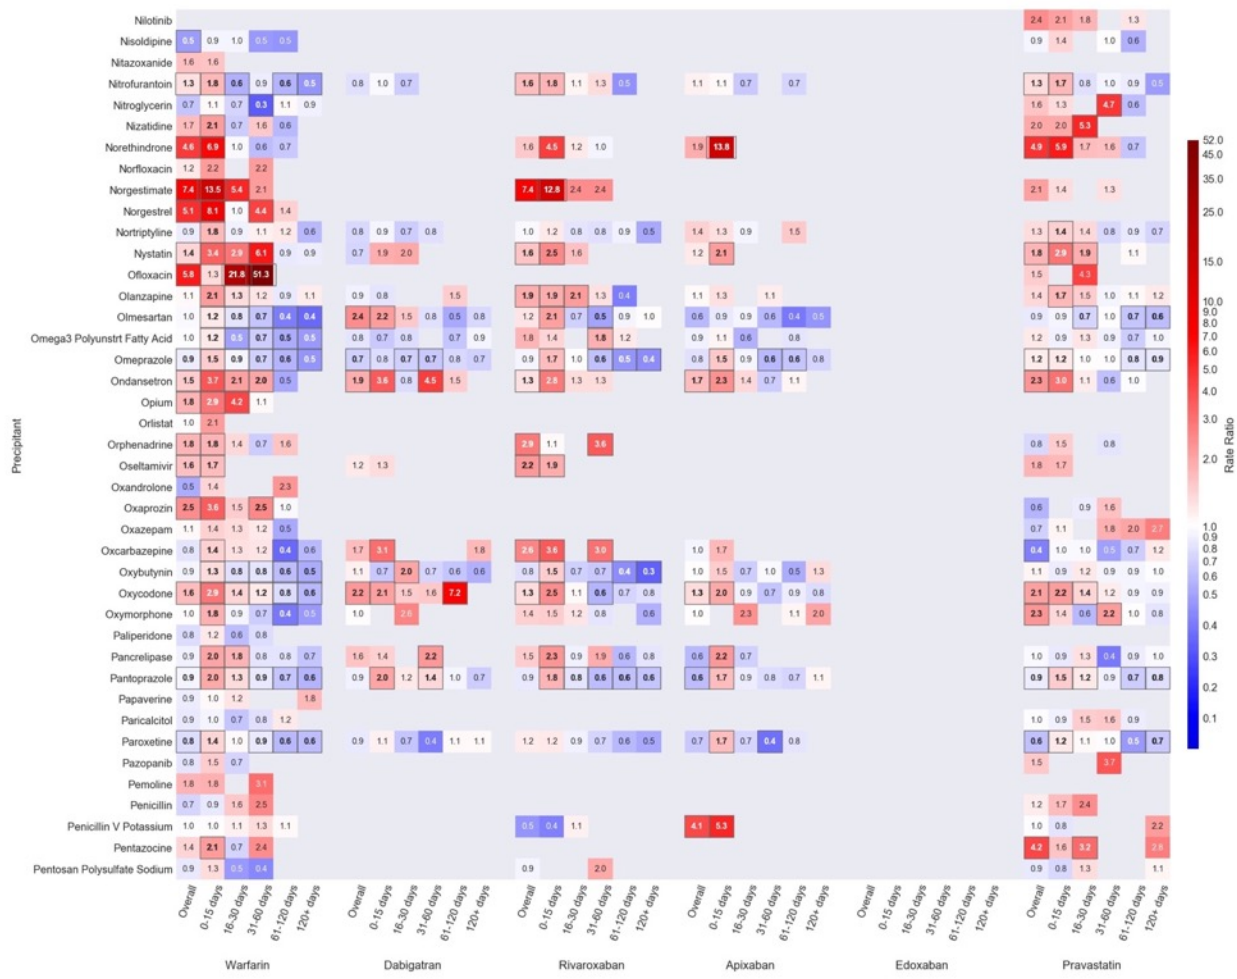

Precipitants are listed alphabetically. Rate ratios highlighted with bold text and a dark grey box are statistically significant (p<0.05). Panel K includes precipitants from niloitinib to pentosane polysulfate sodium.

Figure S1. Continued.

L

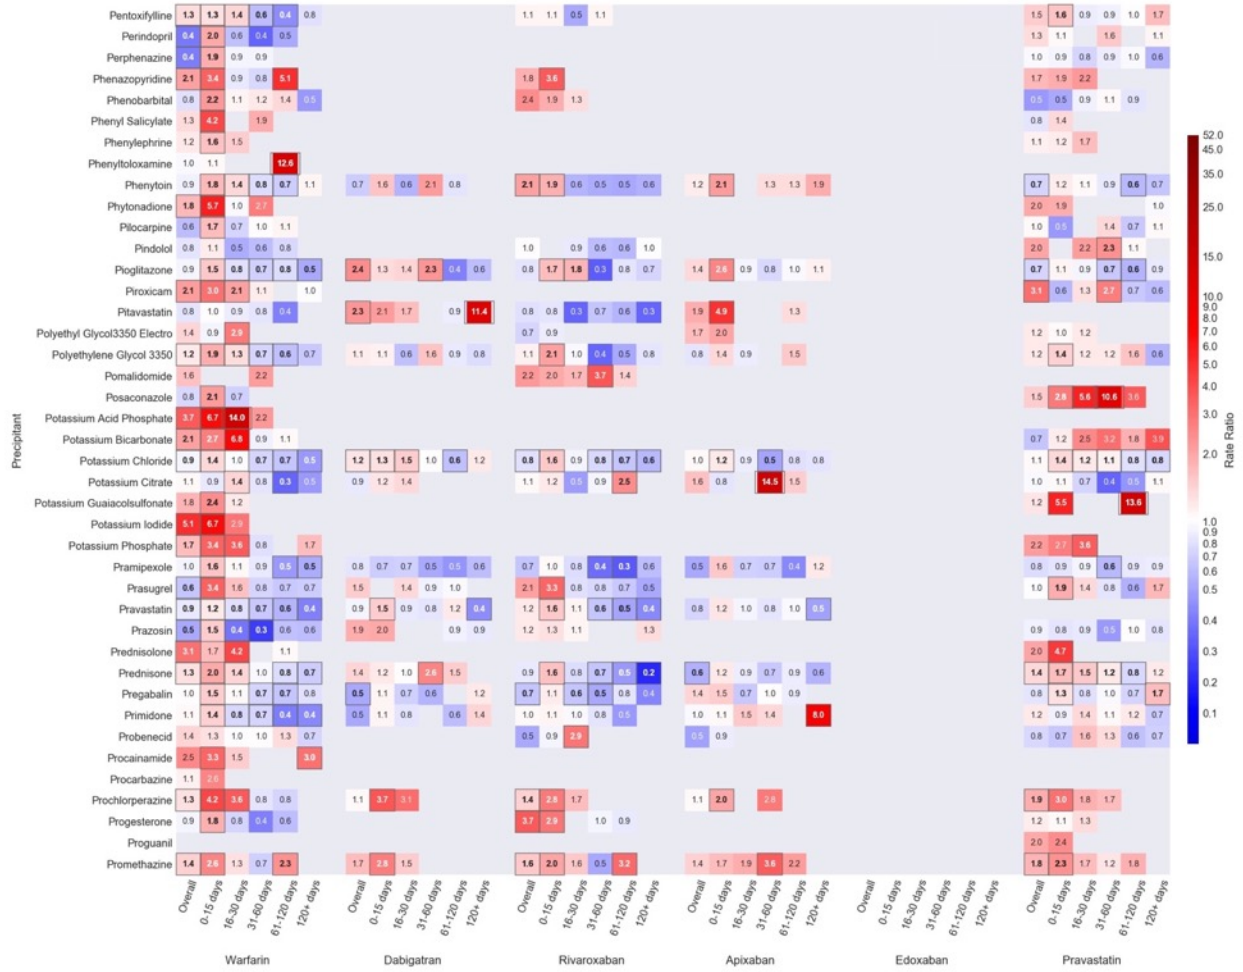

Precipitants are listed alphabetically. Rate ratios highlighted with bold text and a dark grey box are statistically significant ( $p < 0.05$ ). Panel L includes precipitants from pentoxifylline to promethazine.

Figure S1. Continued.

M

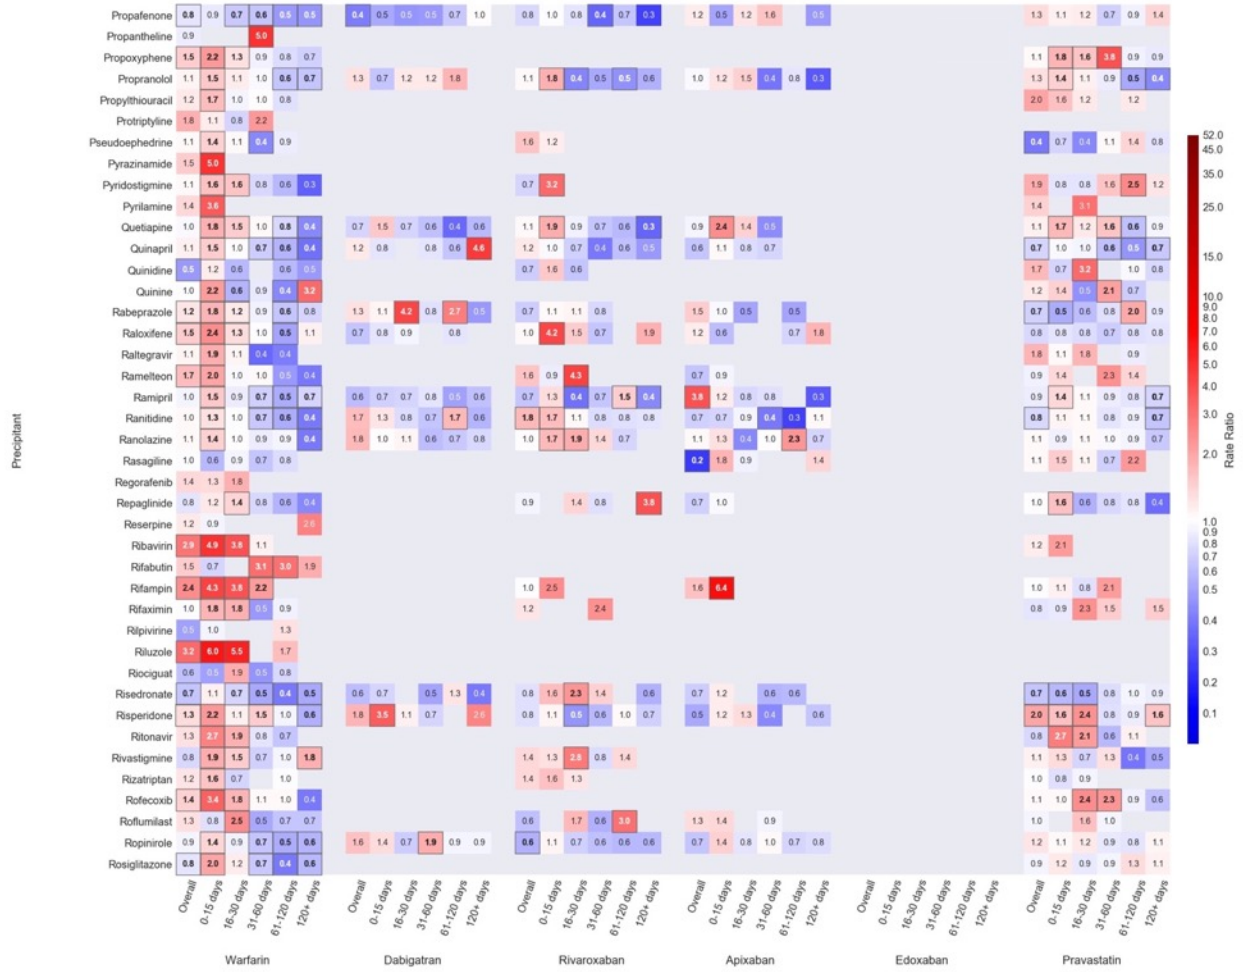

Precipitants are listed alphabetically. Rate ratios highlighted with bold text and a dark grey box are statistically significant (p<0.05). Panel M includes precipitants from propafenone to rosiglitazone.

Figure S1. Continued.

N

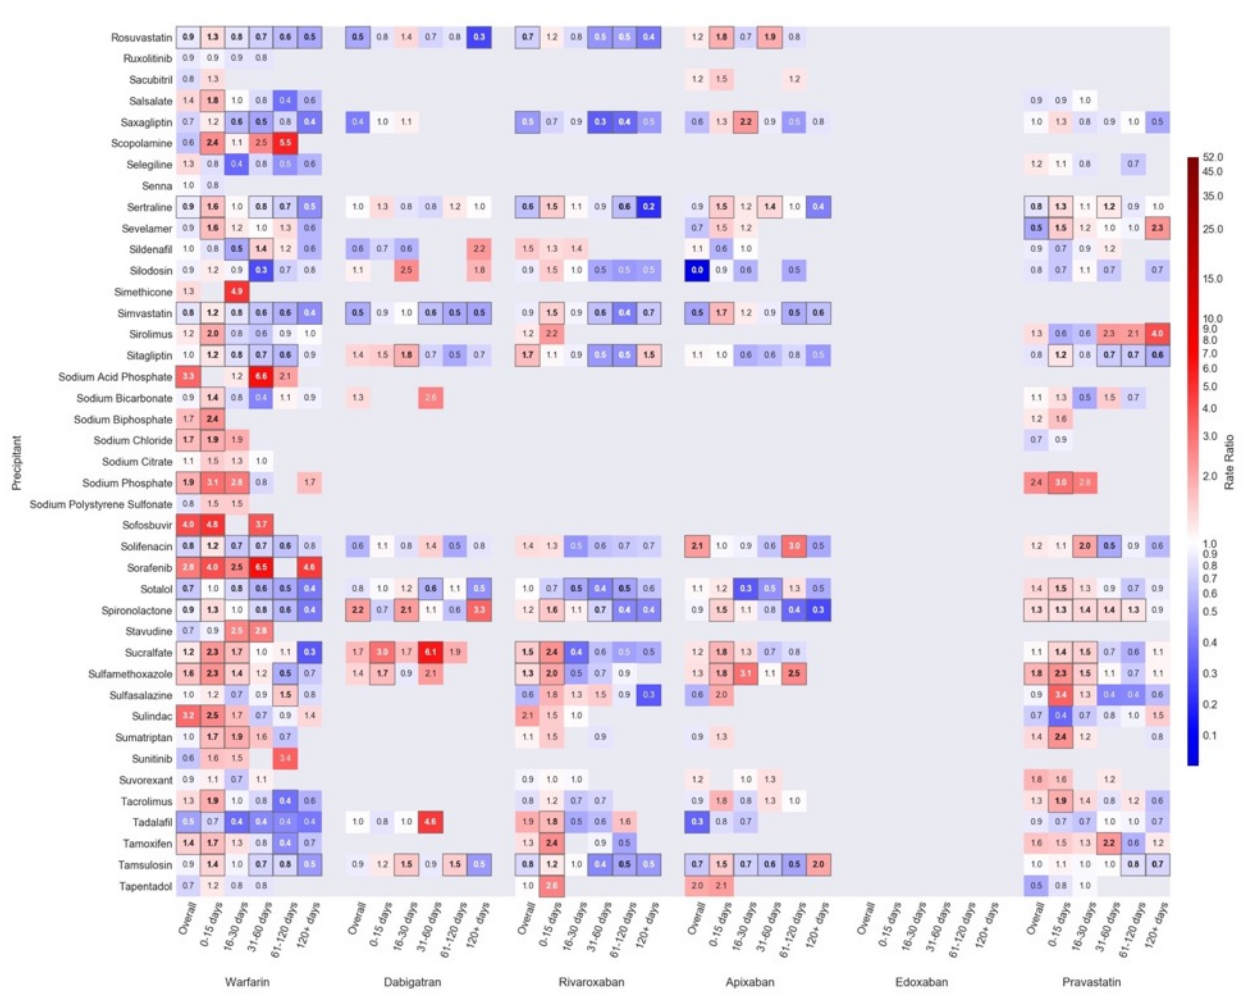

Precipitants are listed alphabetically. Rate ratios highlighted with bold text and a dark grey box are statistically significant ( $p < 0.05$ ). Panel N includes precipitants from rosuvastatin to tapentadol.

Figure S1. Continued.

O

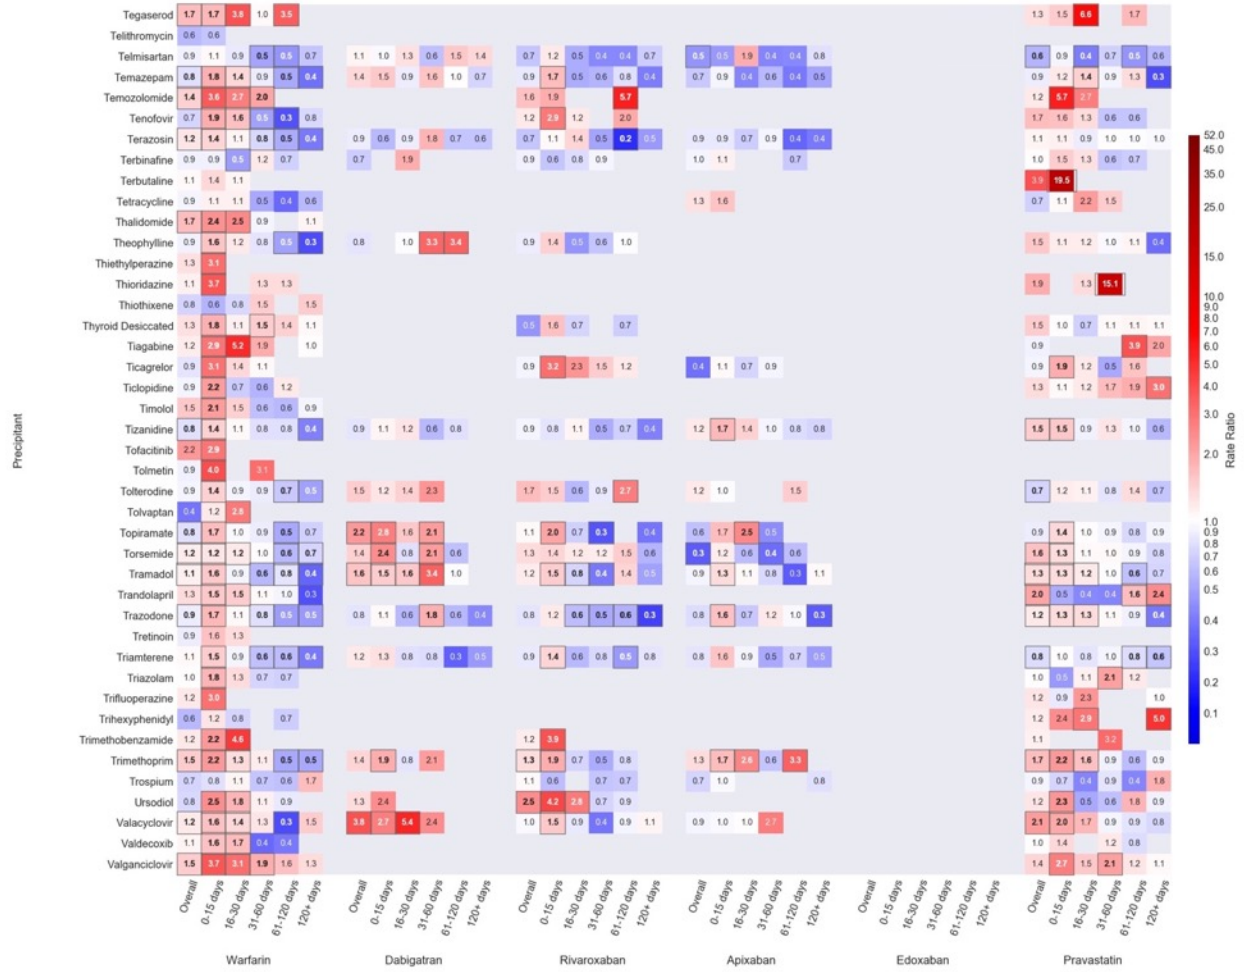

Precipitants are listed alphabetically. Rate ratios highlighted with bold text and a dark grey box are statistically significant ( $p < 0.05$ ). Panel O includes precipitants from tegaserod to valganciclovir.

Figure S1. Continued.

P

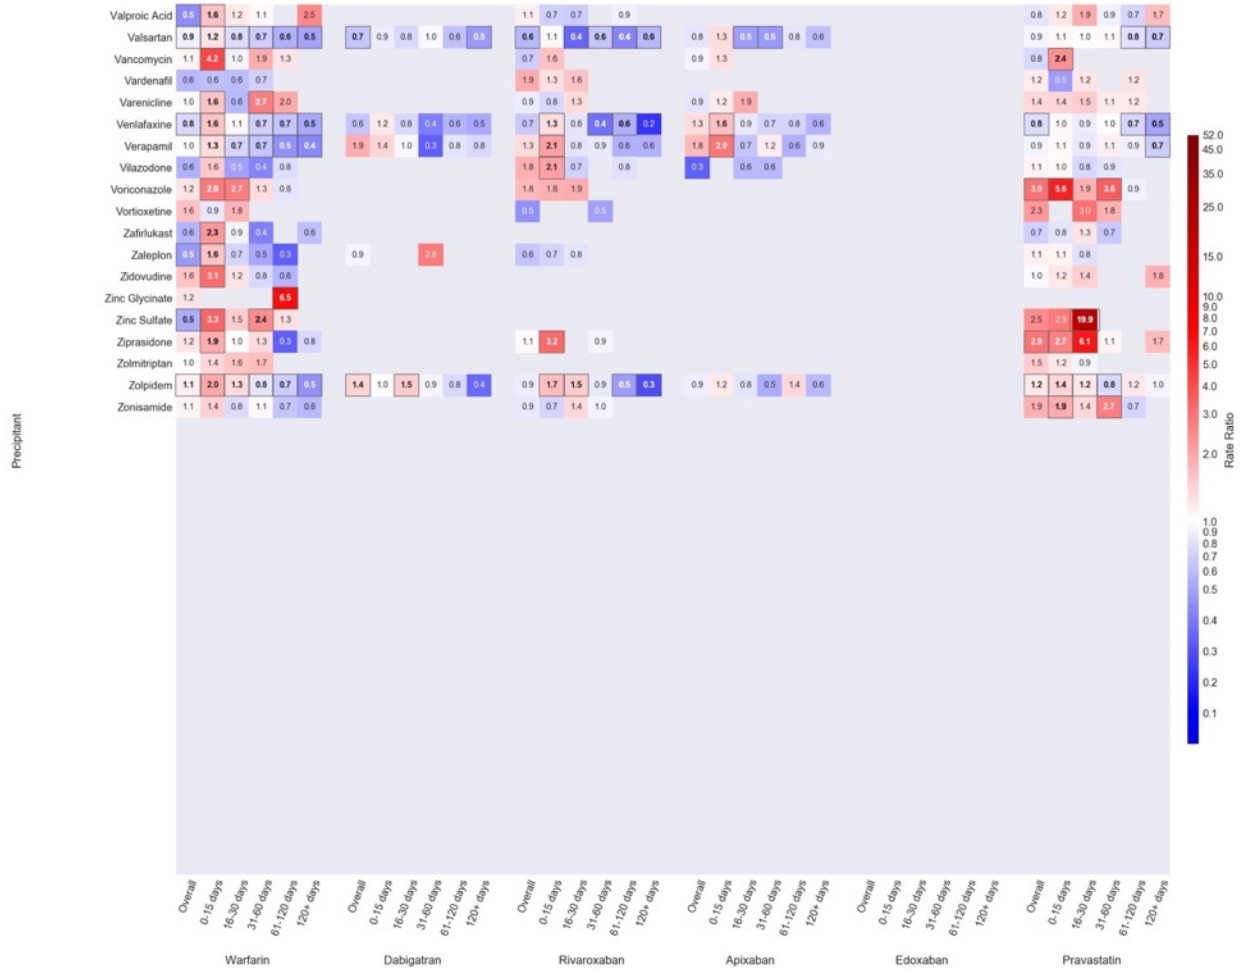

Precipitants are listed alphabetically. Rate ratios highlighted with bold text and a dark grey box are statistically significant ( $p < 0.05$ ). Panel P includes precipitants from valproic acid to zonisamide.



**Figure S2.** Heatmaps presenting ratio of rate ratios comparing precipitant exposed time vs. precipitant unexposed time.

A

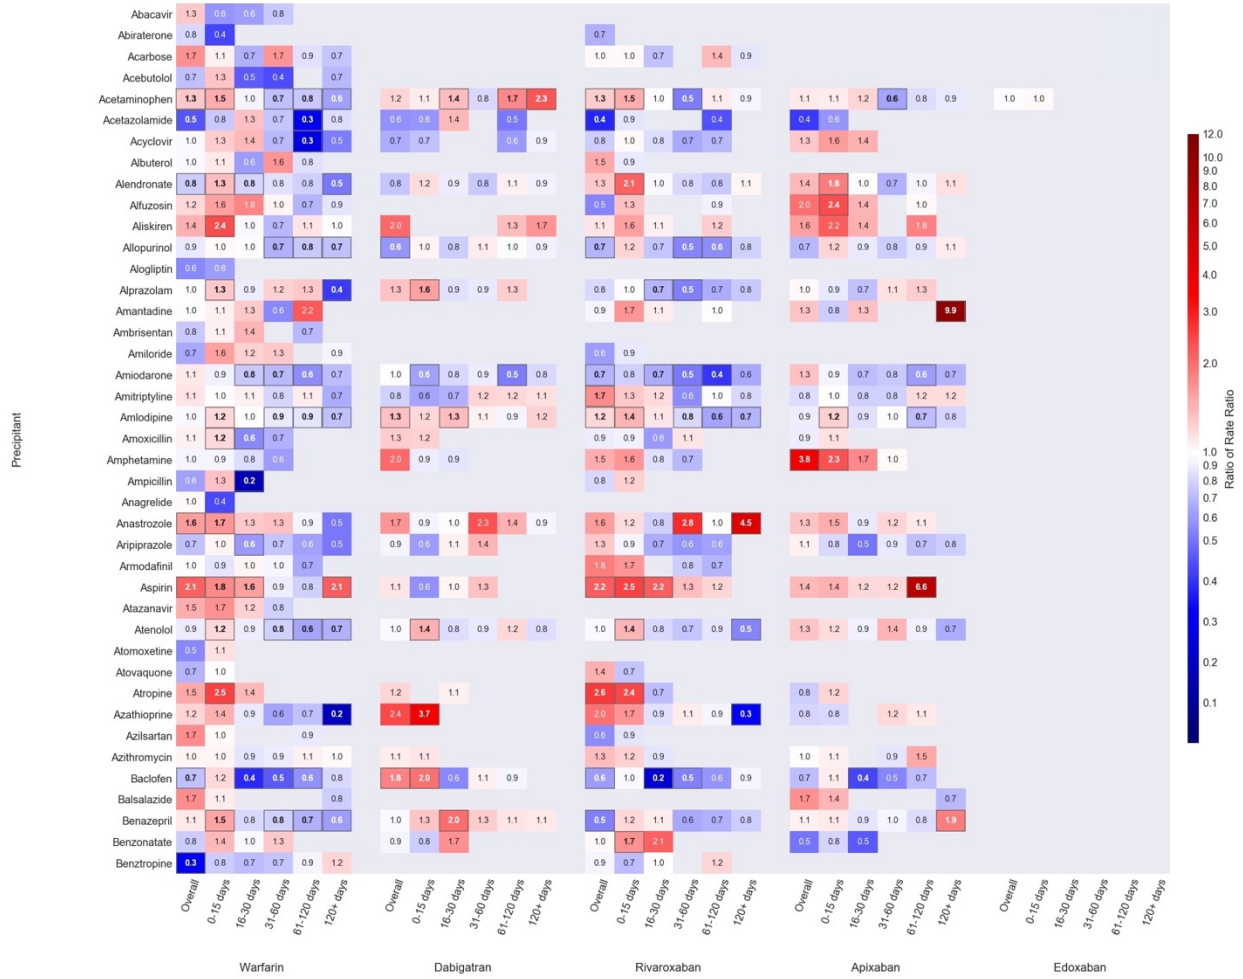

Precipitants are listed alphabetically. Ratio of rate ratios highlighted with bold text and a dark grey box are statistically significant (p<0.05). Panel A includes precipitants from abacavir to benzotropine.

Figure S2. Continued.

B

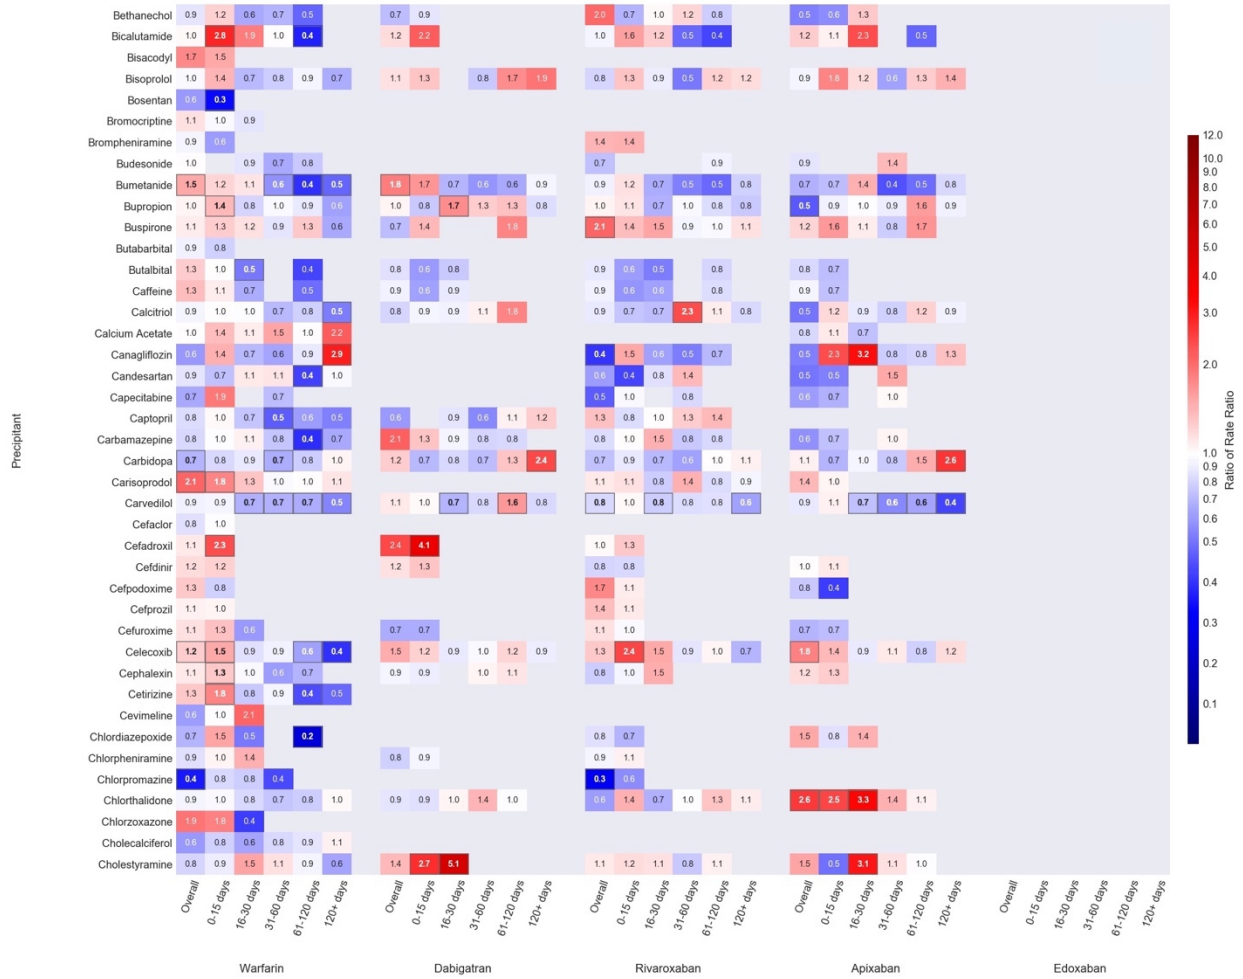

Precipitants are listed alphabetically. Ratio of rate ratios highlighted with bold text and a dark grey box are statistically significant (p < 0.05). Panel B includes precipitants from bethanechol to cholestyramine.

Figure S2. Continued.

C

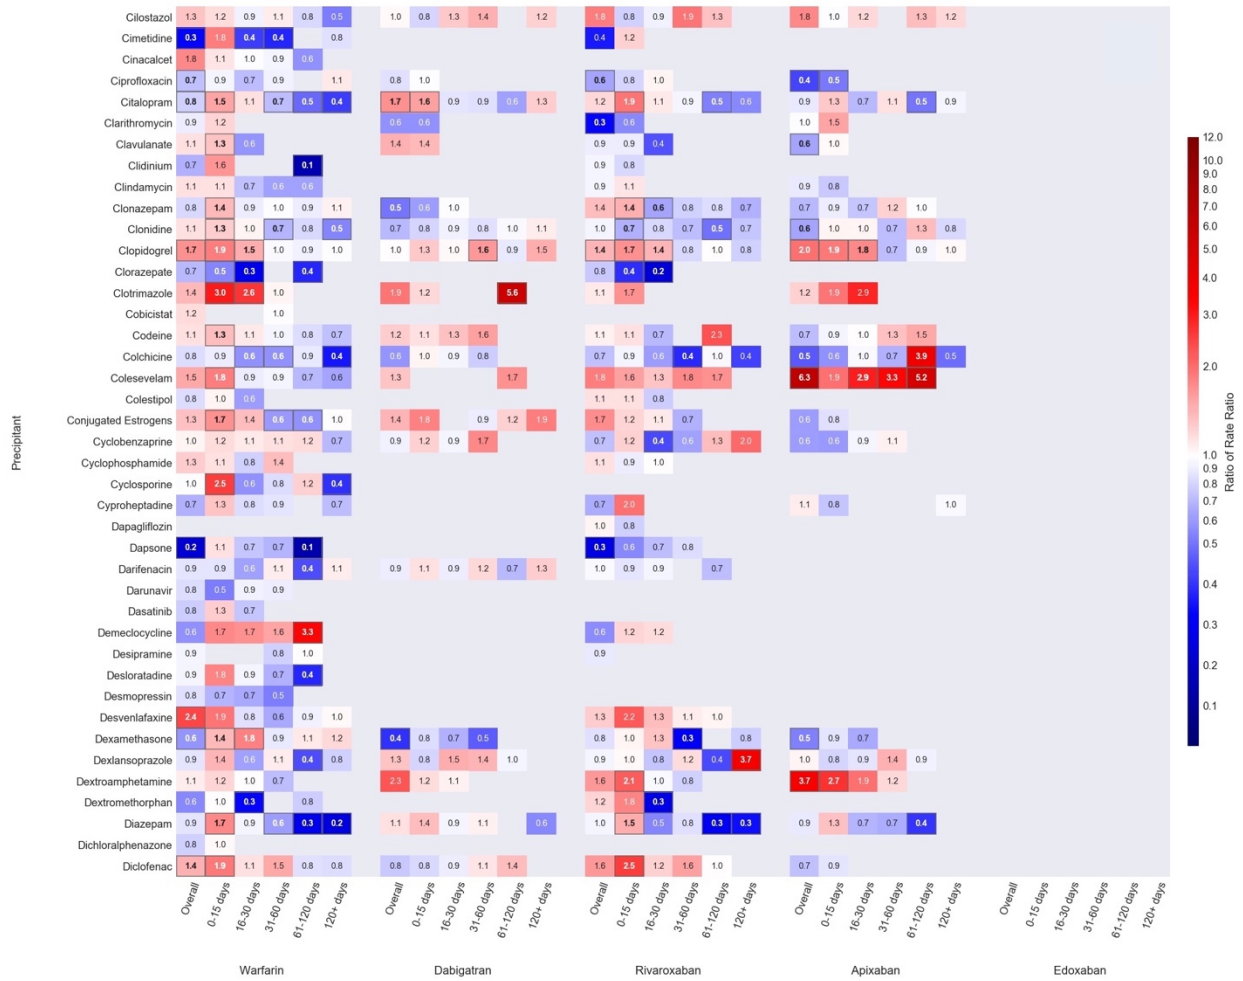

Precipitants are listed alphabetically. Ratio of rate ratios highlighted with bold text and a dark grey box are statistically significant ( $p < 0.05$ ). Panel C includes precipitants from cilostazol to diclofenac.

Figure S2. Continued.

D

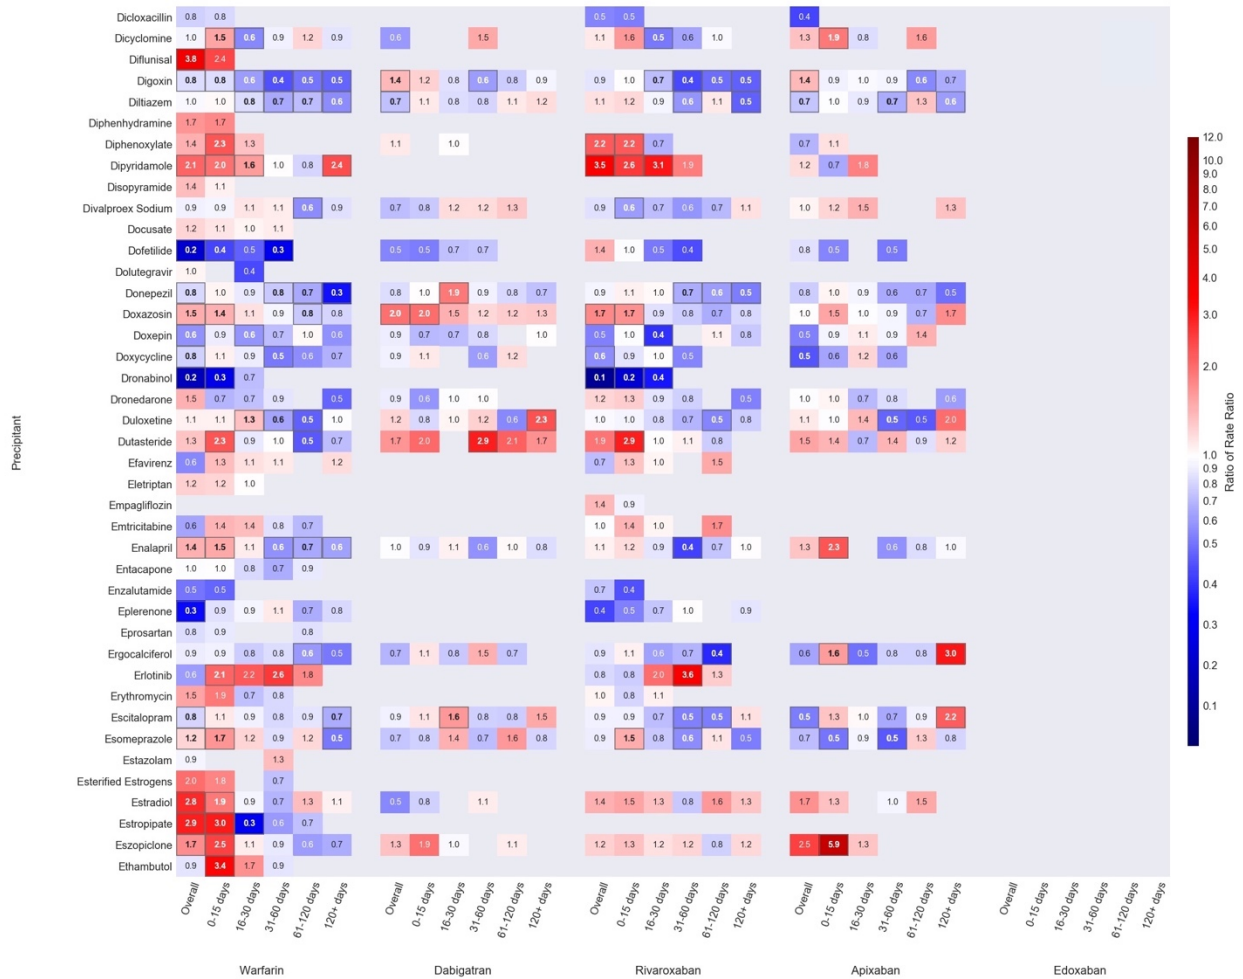

Precipitants are listed alphabetically. Ratio of rate ratios highlighted with bold text and a dark grey box are statistically significant ( $p < 0.05$ ). Panel D includes precipitants from dicloxacillin to ethambutol.

Figure S2. Continued.

E

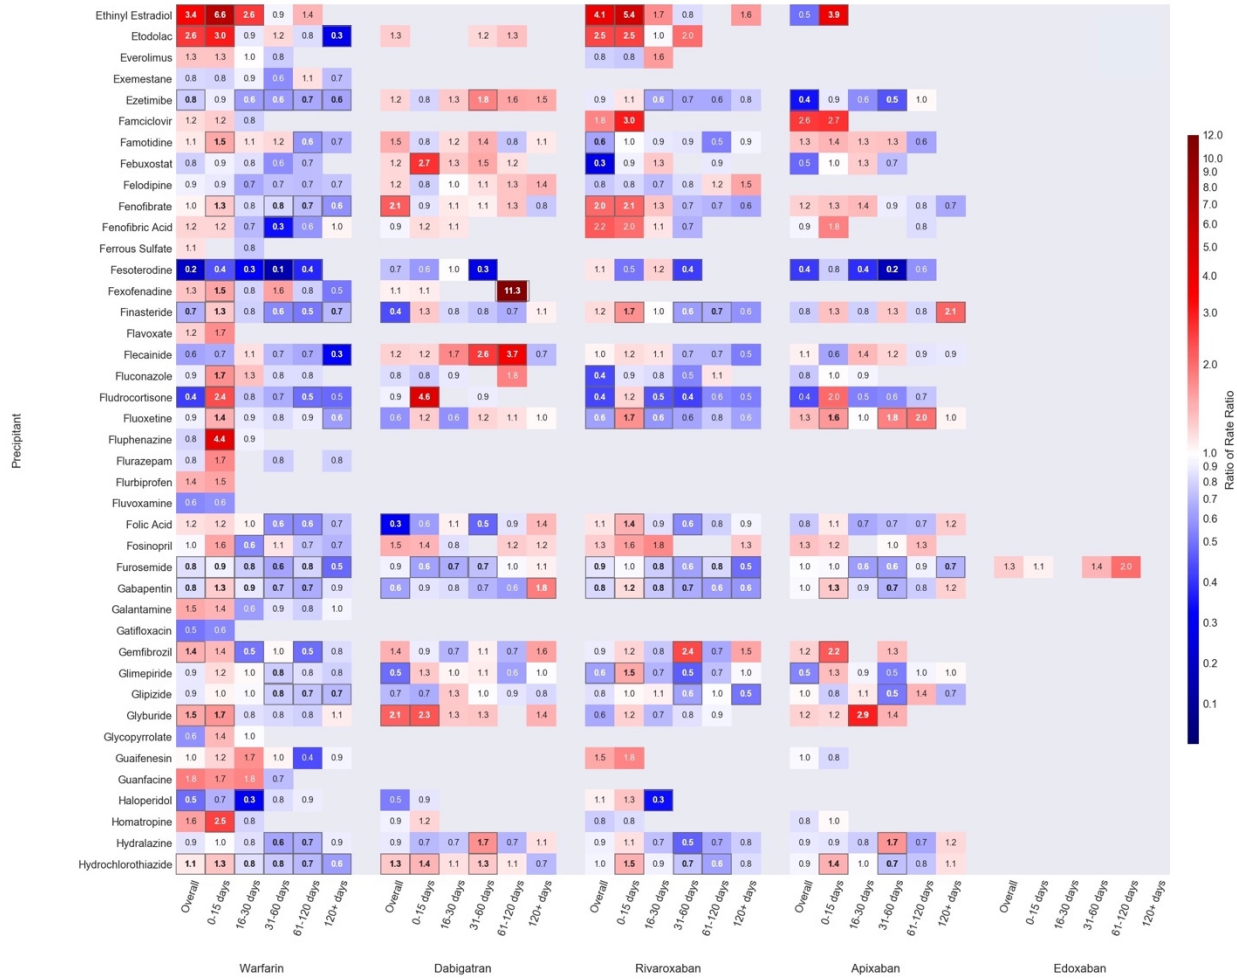

Precipitants are listed alphabetically. Ratio of rate ratios highlighted with bold text and a dark grey box are statistically significant (p < 0.05). Panel E includes precipitants from ethinyl estradiol to hydrochlorothiazide.

Figure S2. Continued.

F

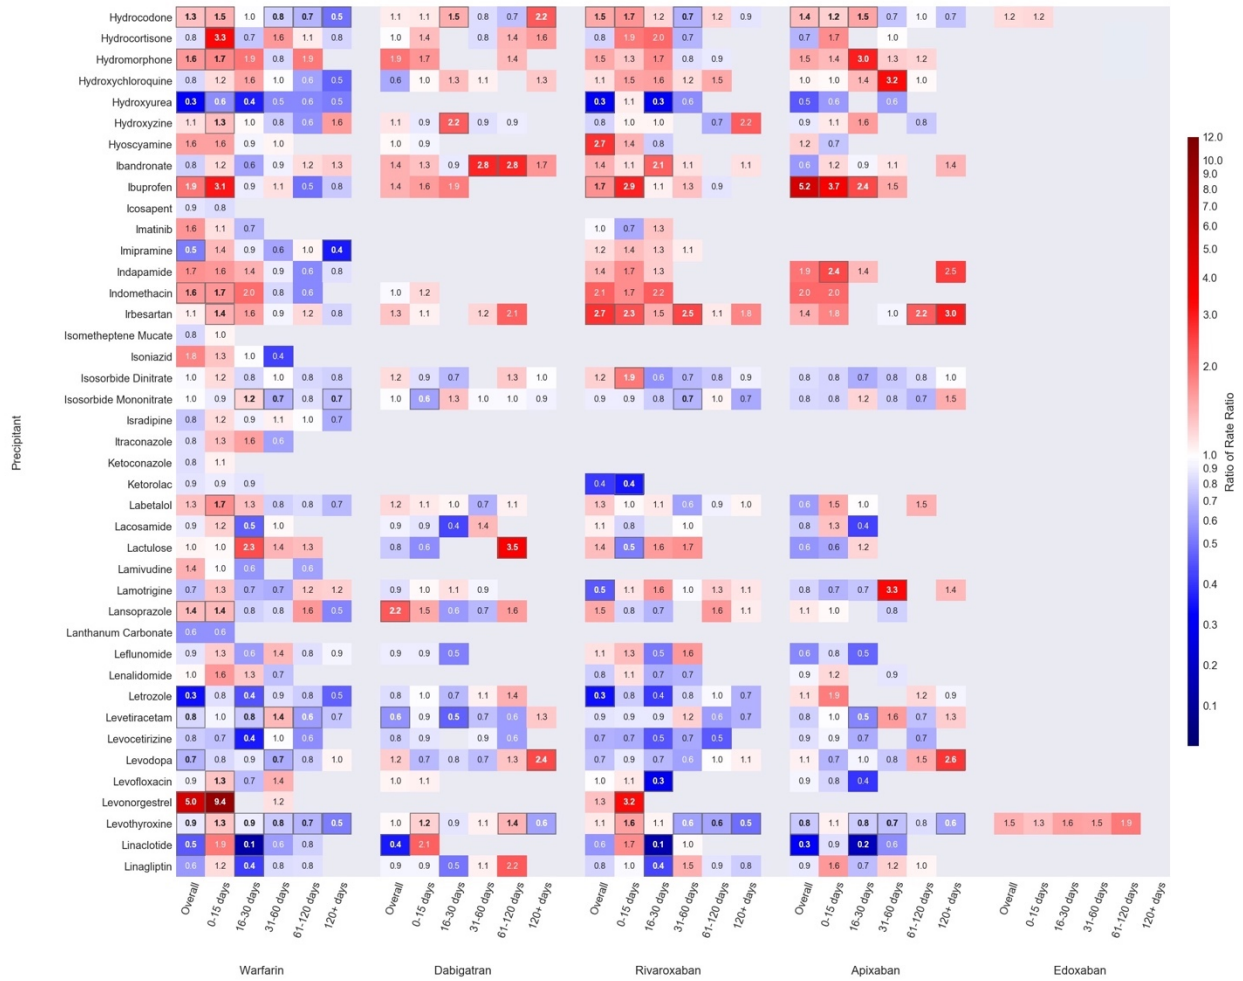

Precipitants are listed alphabetically. Ratio of rate ratios highlighted with bold text and a dark grey box are statistically significant (p<0.05). Panel F includes precipitants from hydrocodone to linagliptin.

Figure S2. Continued.

G

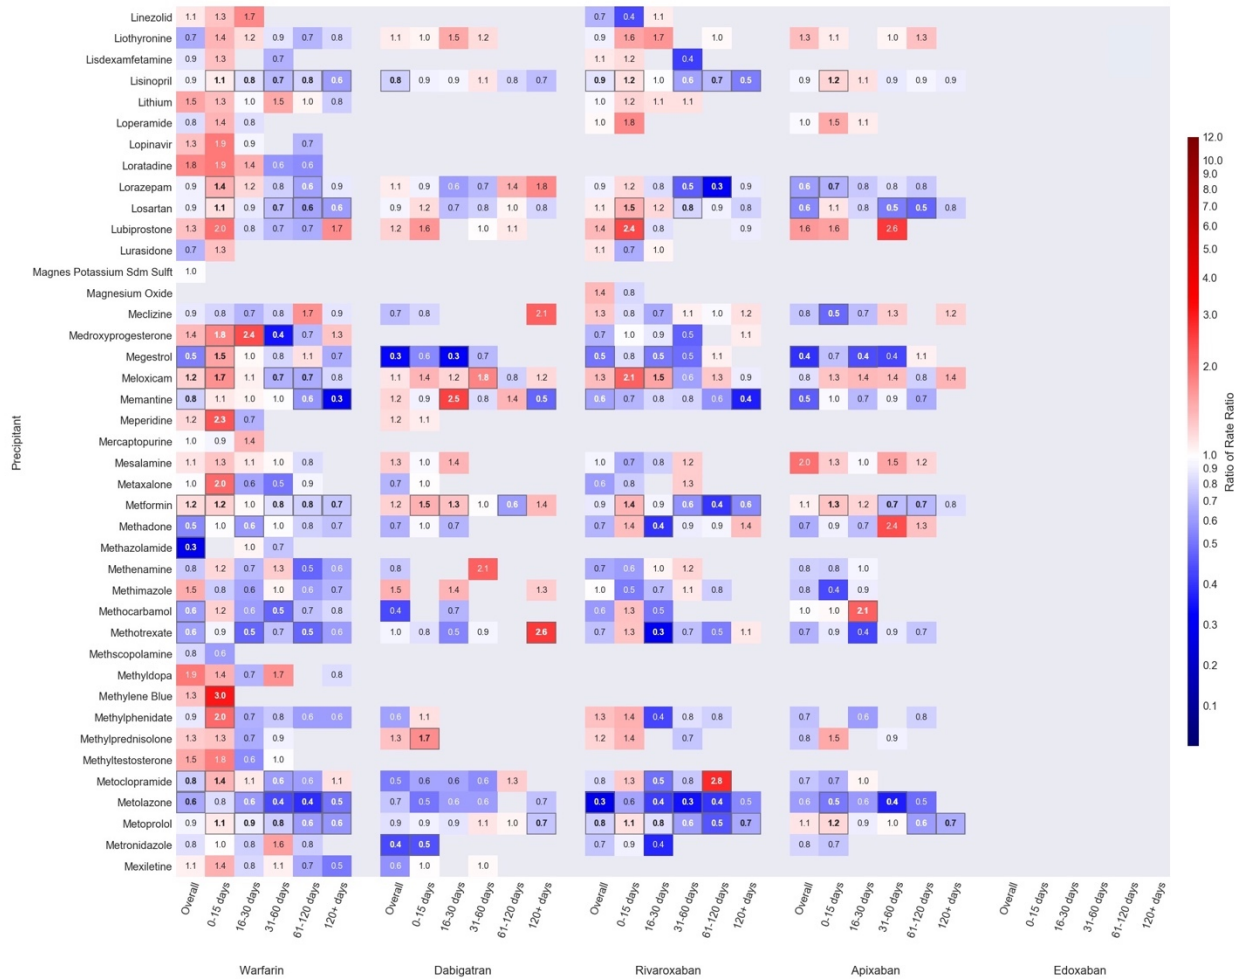

Precipitants are listed alphabetically. Ratio of rate ratios highlighted with bold text and a dark grey box are statistically significant (p < 0.05). Panel G includes precipitants from linezolid to mexiletine.

Figure S2. Continued.

H

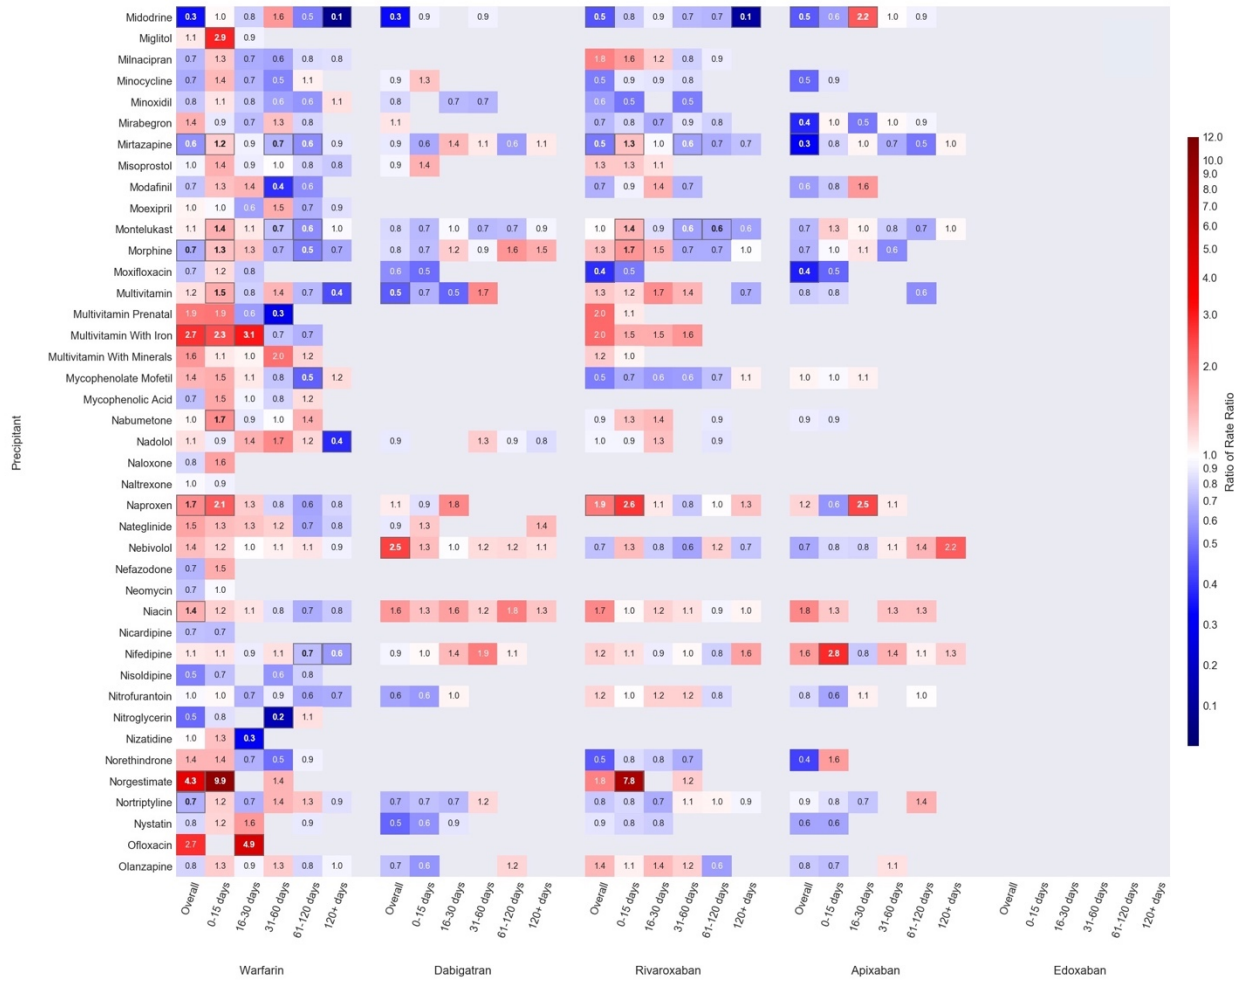

Precipitants are listed alphabetically. Ratio of rate ratios highlighted with bold text and a dark grey box are statistically significant (p < 0.05). Panel H includes precipitants from midodrine to olanzapine.



Figure S2. Continued.

I

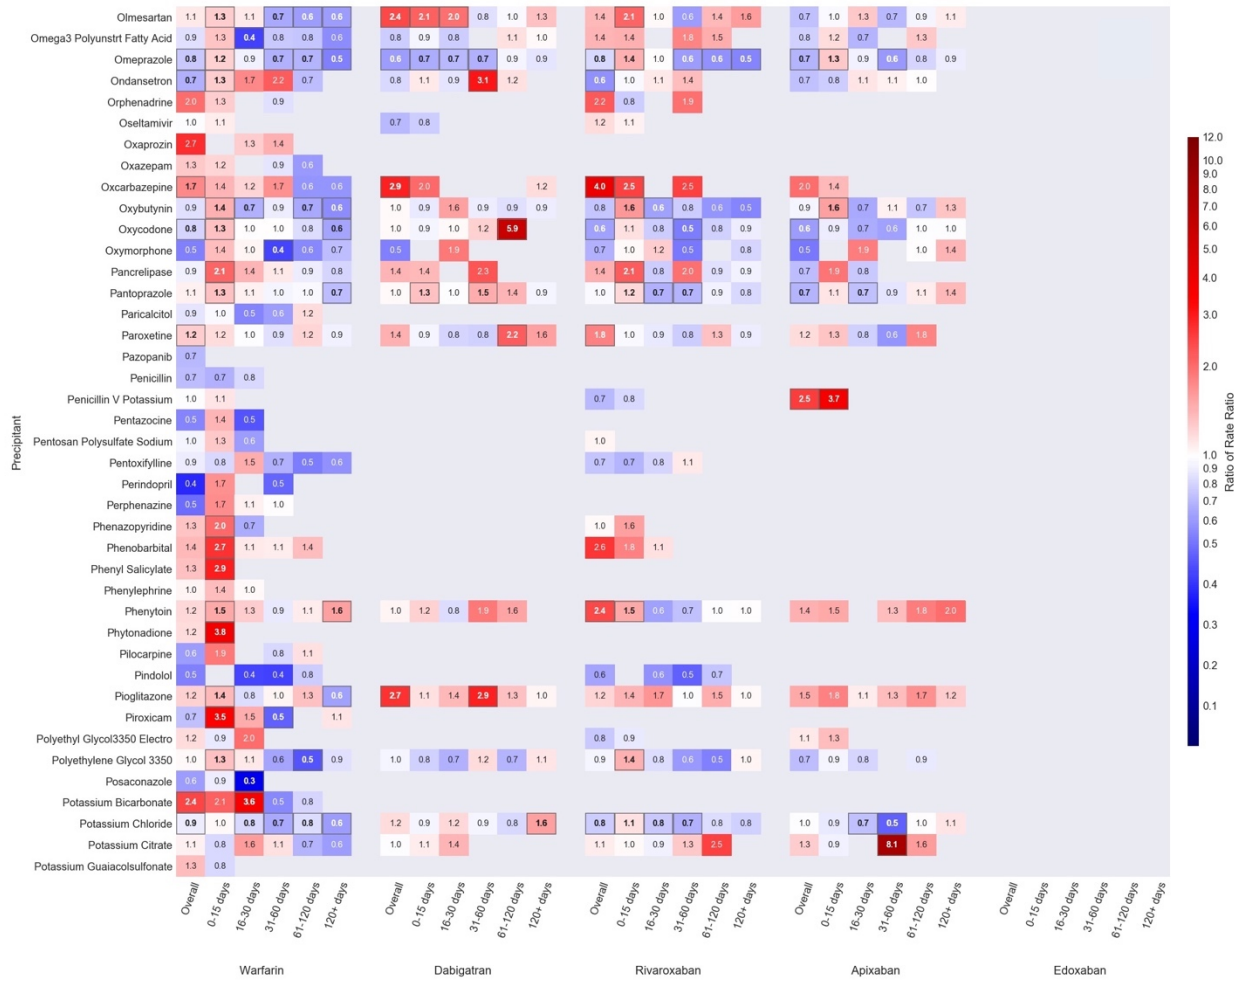

Precipitants are listed alphabetically. Ratio of rate ratios highlighted with bold text and a dark grey box are statistically significant (p<0.05). Panel I includes precipitants from olmesartan to potassium guaiacolsulfonate.

Figure S2. Continued.

J

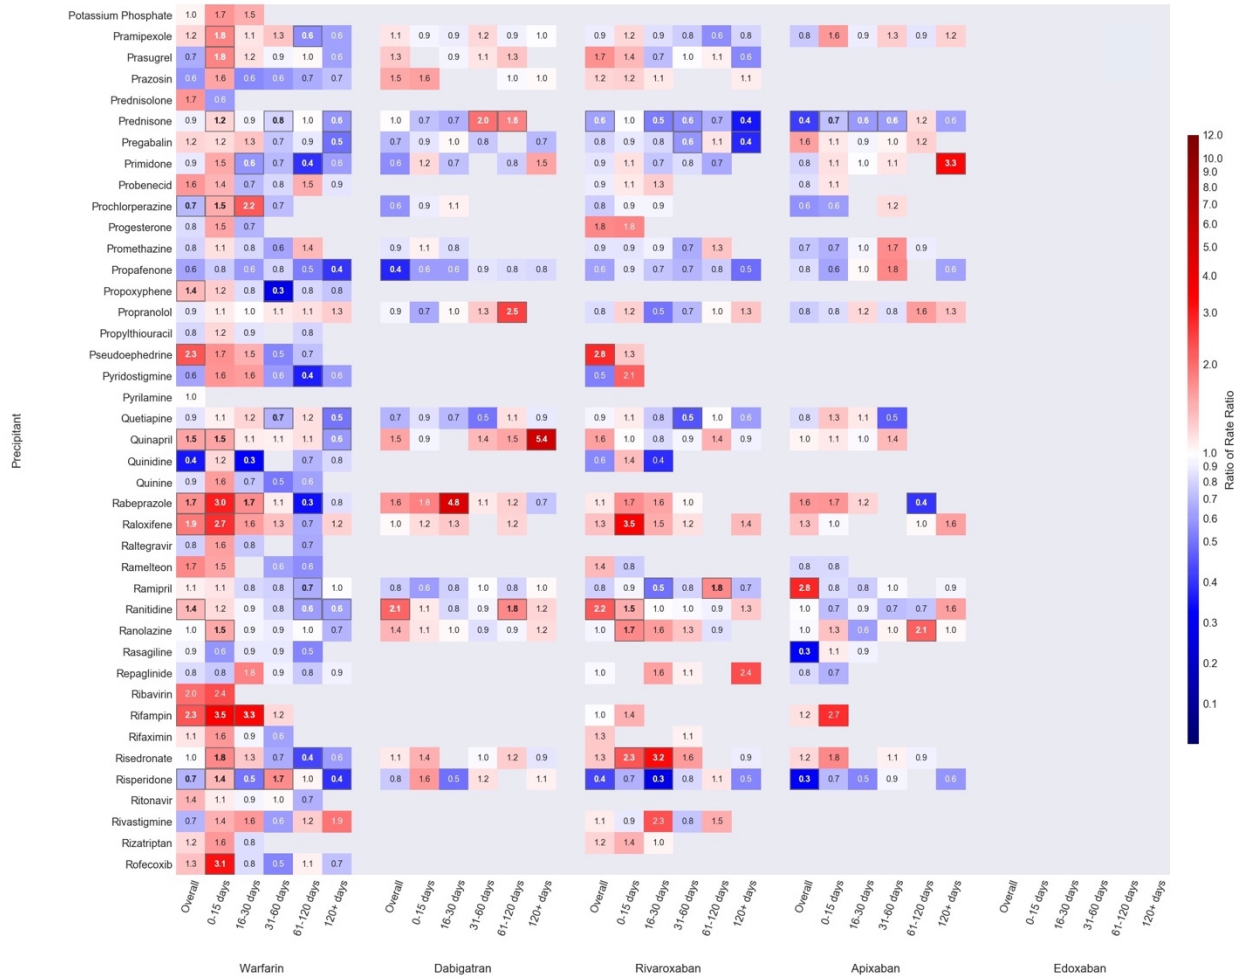

Precipitants are listed alphabetically. Ratio of rate ratios highlighted with bold text and a dark grey box are statistically significant (p<0.05). Panel J includes precipitants from potassium phosphate rofecoxib.

Figure S2. Continued.

K

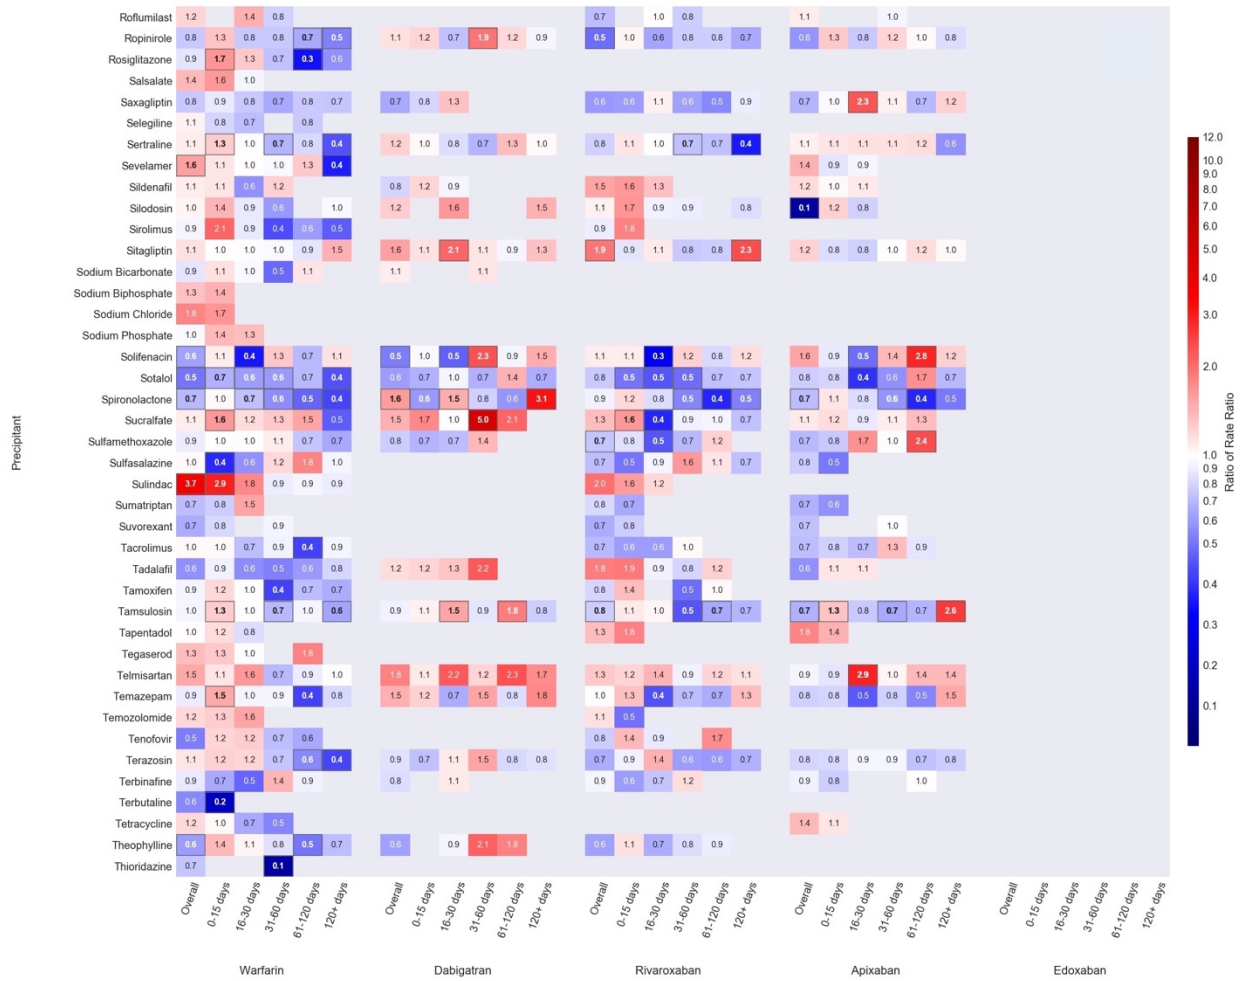

Precipitants are listed alphabetically. Ratio of rate ratios highlighted with bold text and a dark grey box are statistically significant ( $p < 0.05$ ). Panel K includes precipitants from roflumilast to thioridazine.

Figure S2. Continued.

L

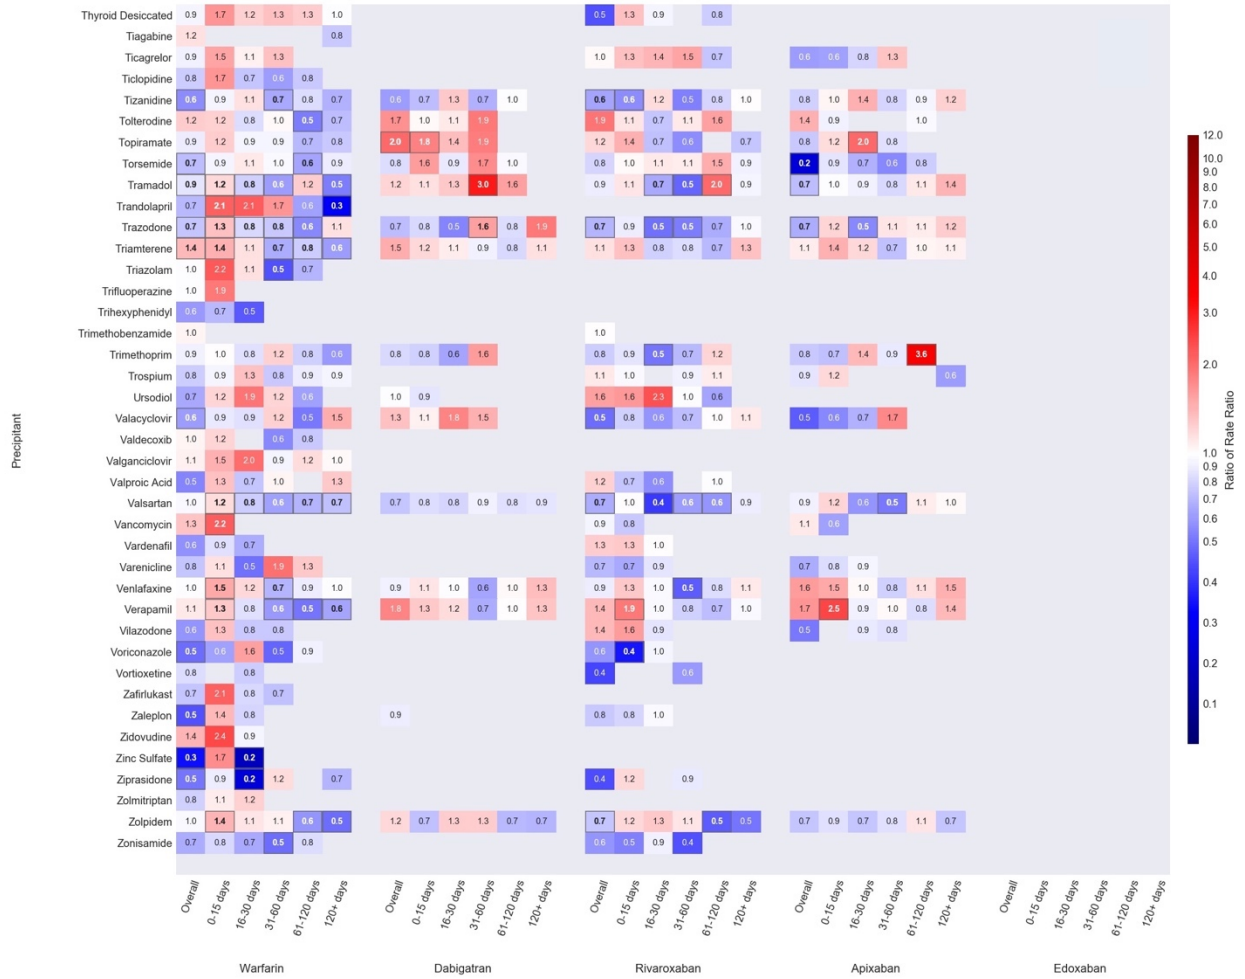

Precipitants are listed alphabetically. Ratio of rate ratios highlighted with bold text and a dark grey box are statistically significant (p < 0.05). Panel L includes precipitants from thyroid desiccated to zonisamide.

**Figure S3.** Heatmaps presenting ratio of rate ratios comparing precipitant exposed time vs. precipitant unexposed time in the secondary analysis.

A

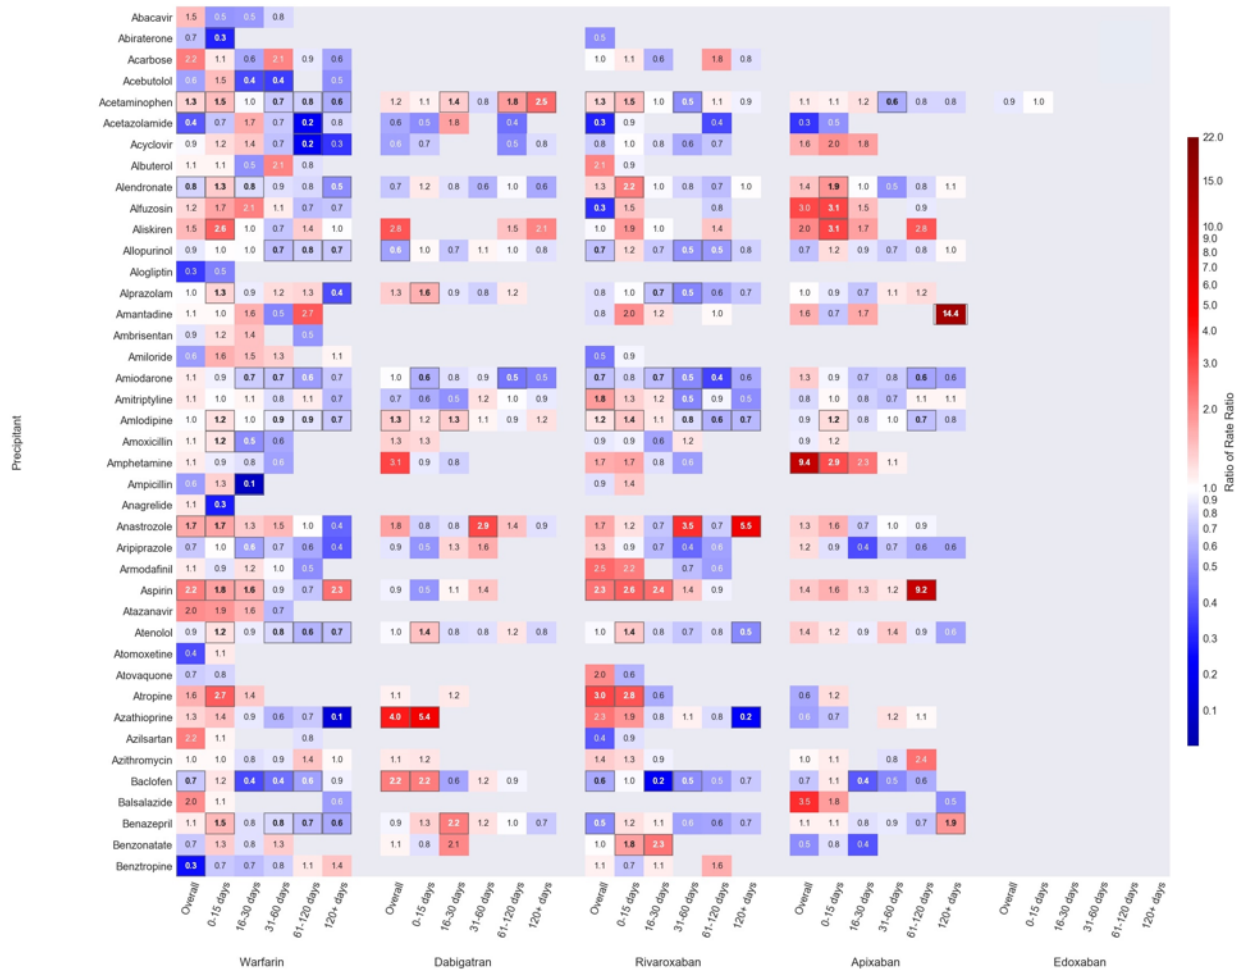

Precipitants are listed alphabetically. Ratio of rate ratios highlighted with bold text and a dark grey box are statistically significant (p < 0.05). Panel A includes precipitants from abacavir to benzotropine.

Figure S3. Continued.

B

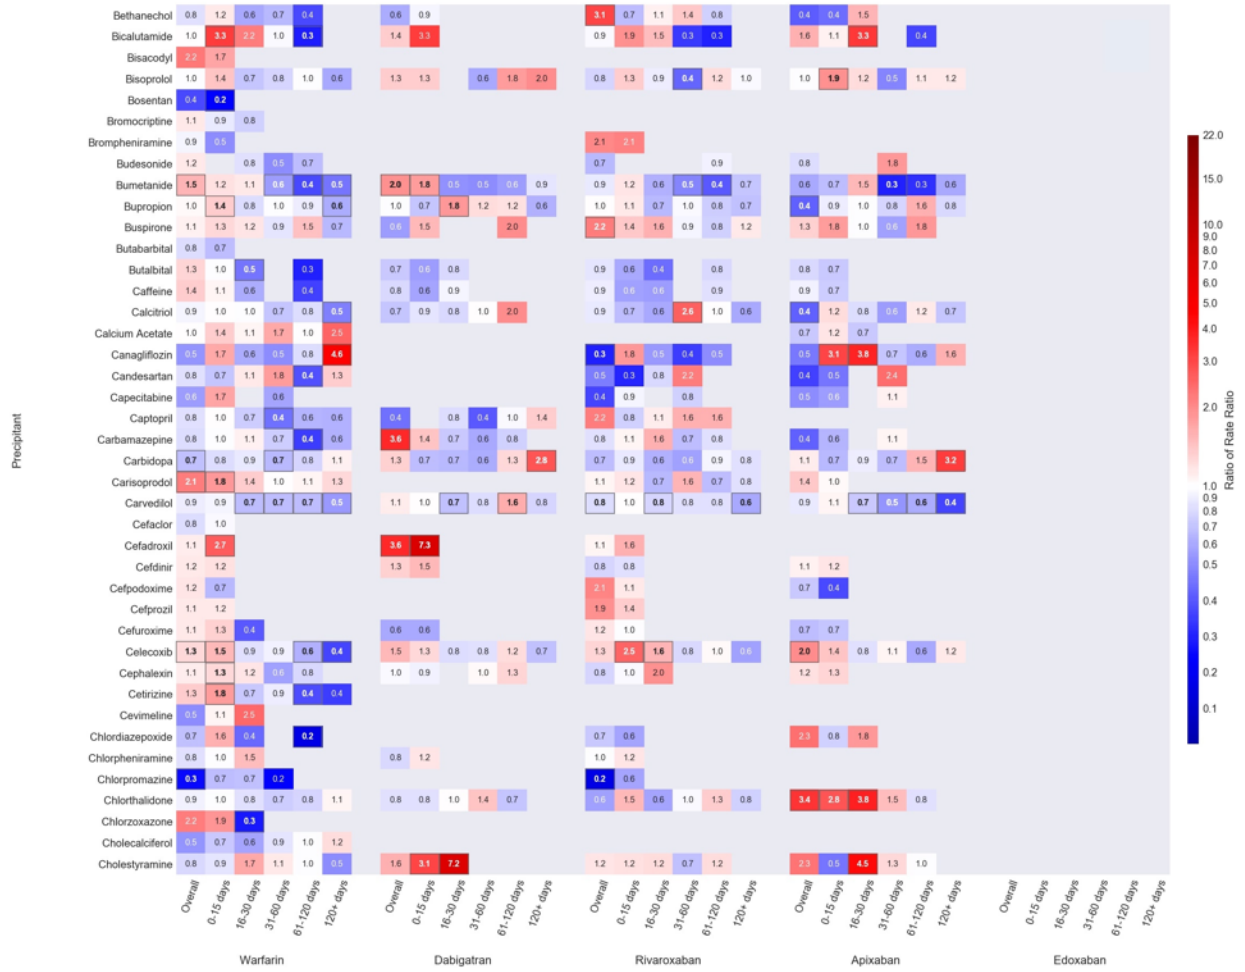

Precipitants are listed alphabetically. Ratio of rate ratios highlighted with bold text and a dark grey box are statistically significant (p < 0.05). Panel B includes precipitants from bethanechol to cholestyramine.

Figure S3. Continued.

C

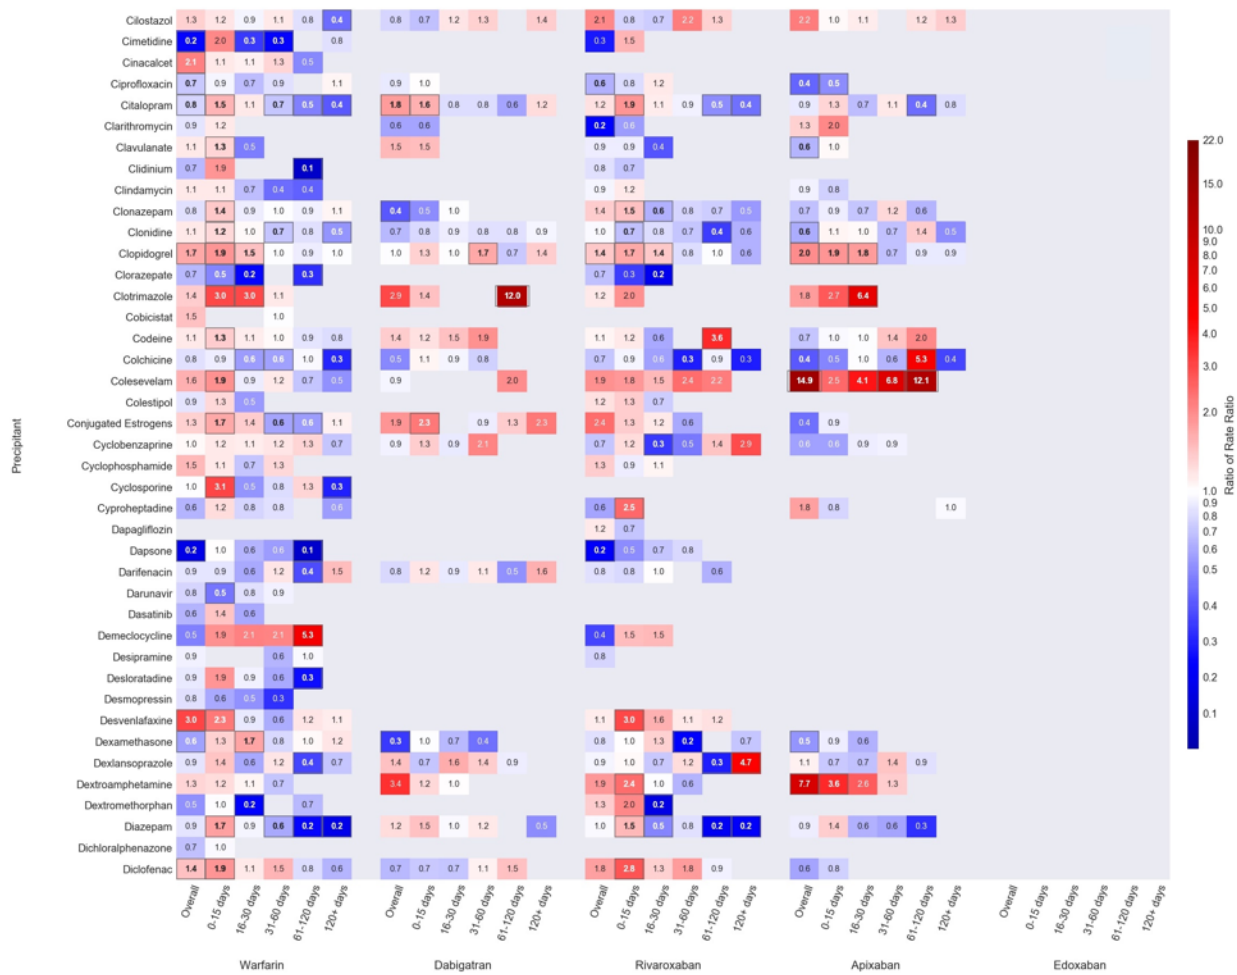

Precipitants are listed alphabetically. Ratio of rate ratios highlighted with bold text and a dark grey box are statistically significant ( $p < 0.05$ ). Panel C includes precipitants from cilostazol to diclofenac.

Figure S3. Continued.

D

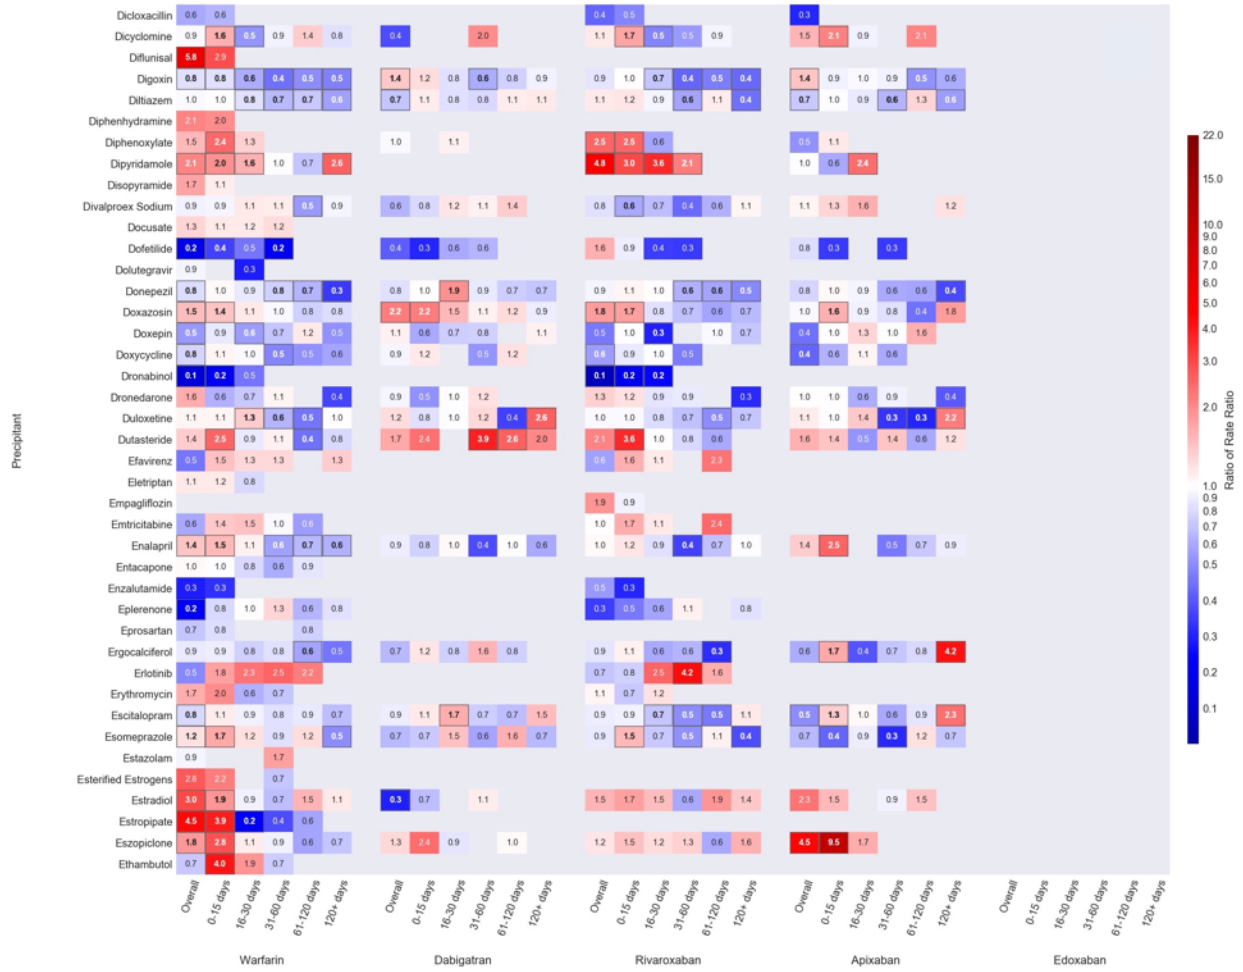

Precipitants are listed alphabetically. Ratio of rate ratios highlighted with bold text and a dark grey box are statistically significant ( $p < 0.05$ ). Panel D includes precipitants from dicloxacillin to ethambutol.



Figure S3. Continued.

E

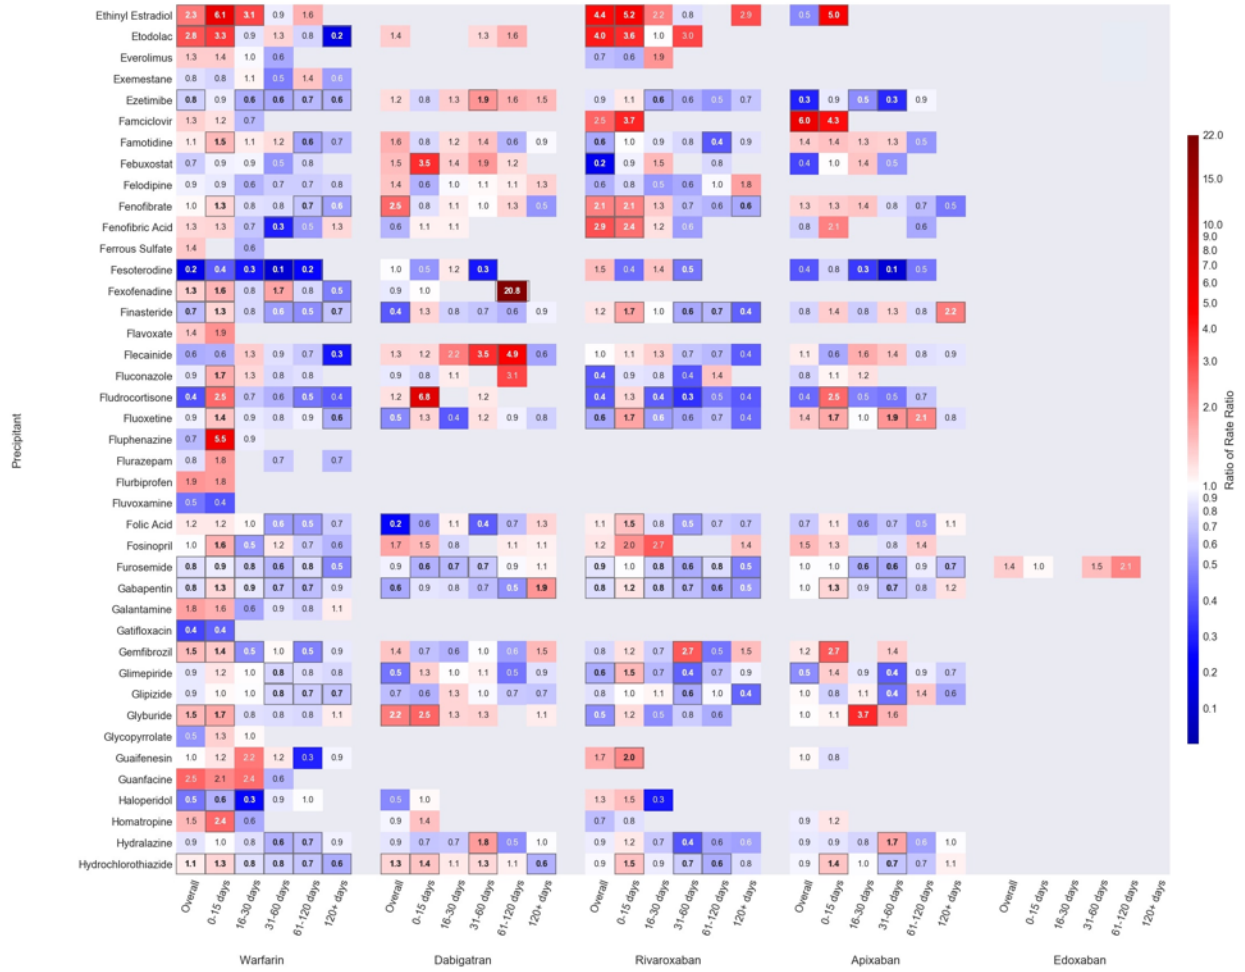

Precipitants are listed alphabetically. Ratio of rate ratios highlighted with bold text and a dark grey box are statistically significant (p < 0.05). Panel E includes precipitants from ethinyl estradiol to hydrochlorothiazide.

Figure S3. Continued.

F

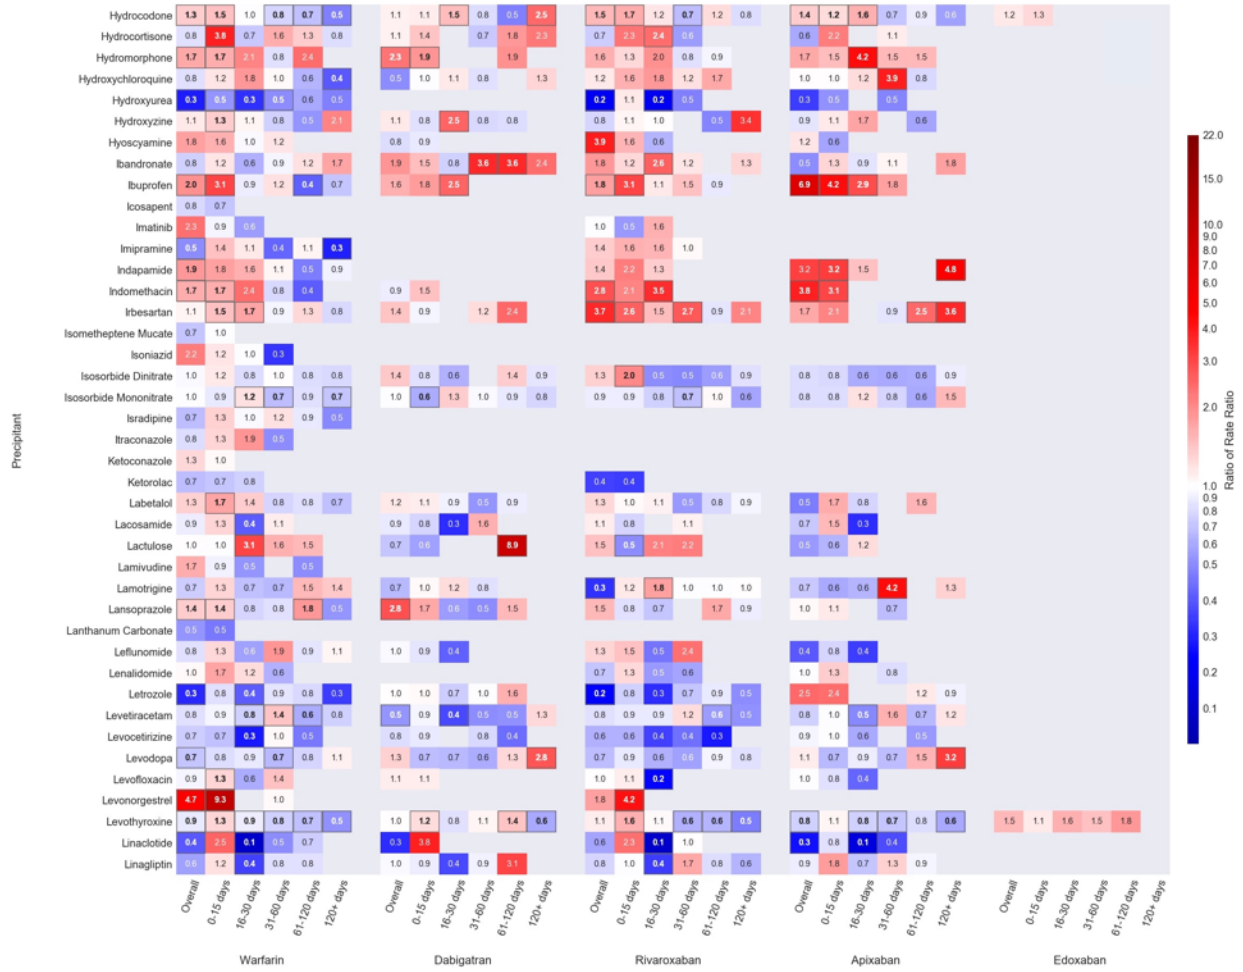

Precipitants are listed alphabetically. Ratio of rate ratios highlighted with bold text and a dark grey box are statistically significant (p < 0.05). Panel F includes precipitants from hydrocodone to linagliptin.

Figure S3. Continued.

G

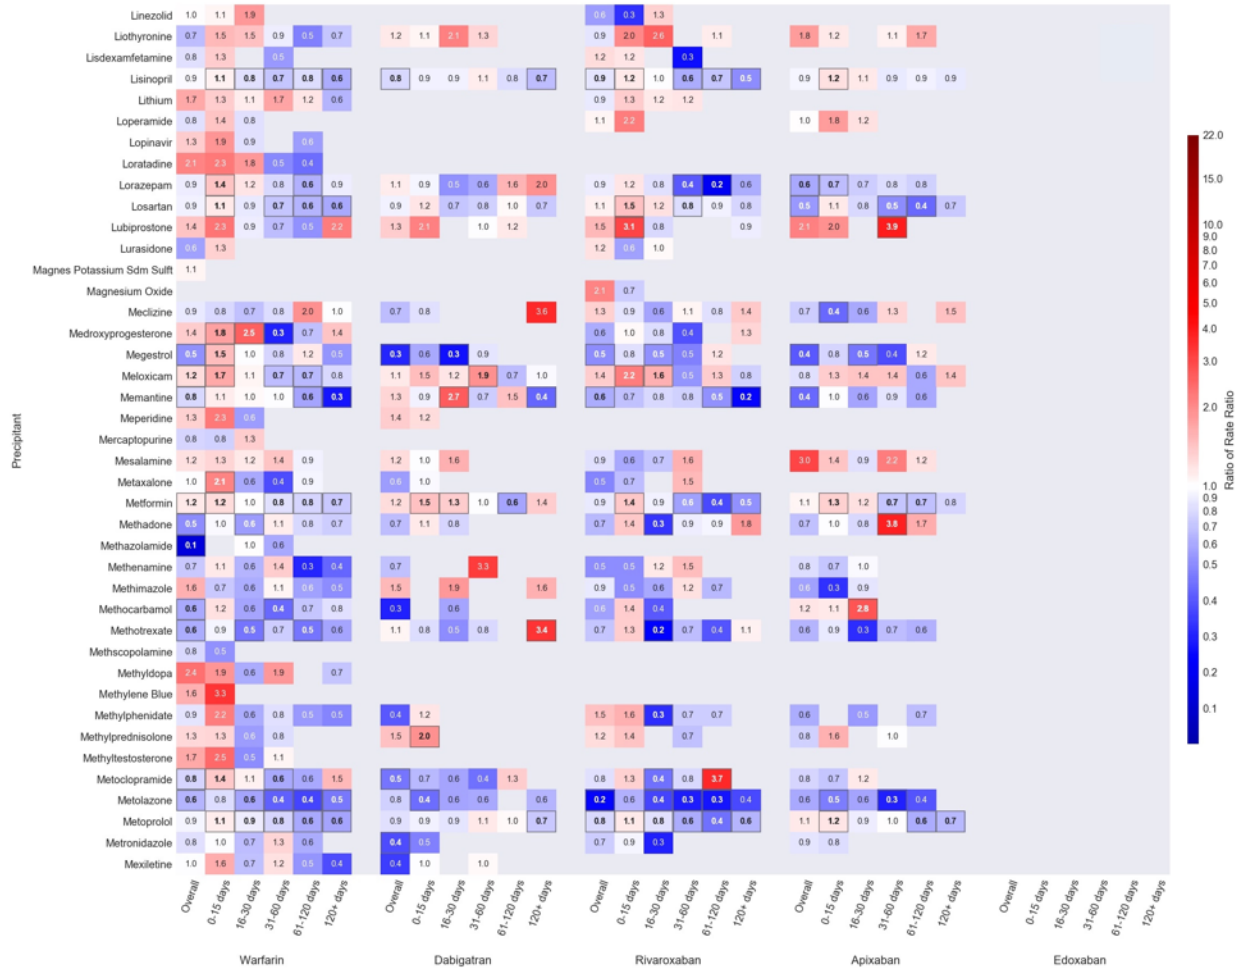

Precipitants are listed alphabetically. Ratio of rate ratios highlighted with bold text and a dark grey box are statistically significant (p < 0.05). Panel G includes precipitants from linezolid to mexiletine.

Figure S3. Continued.

H

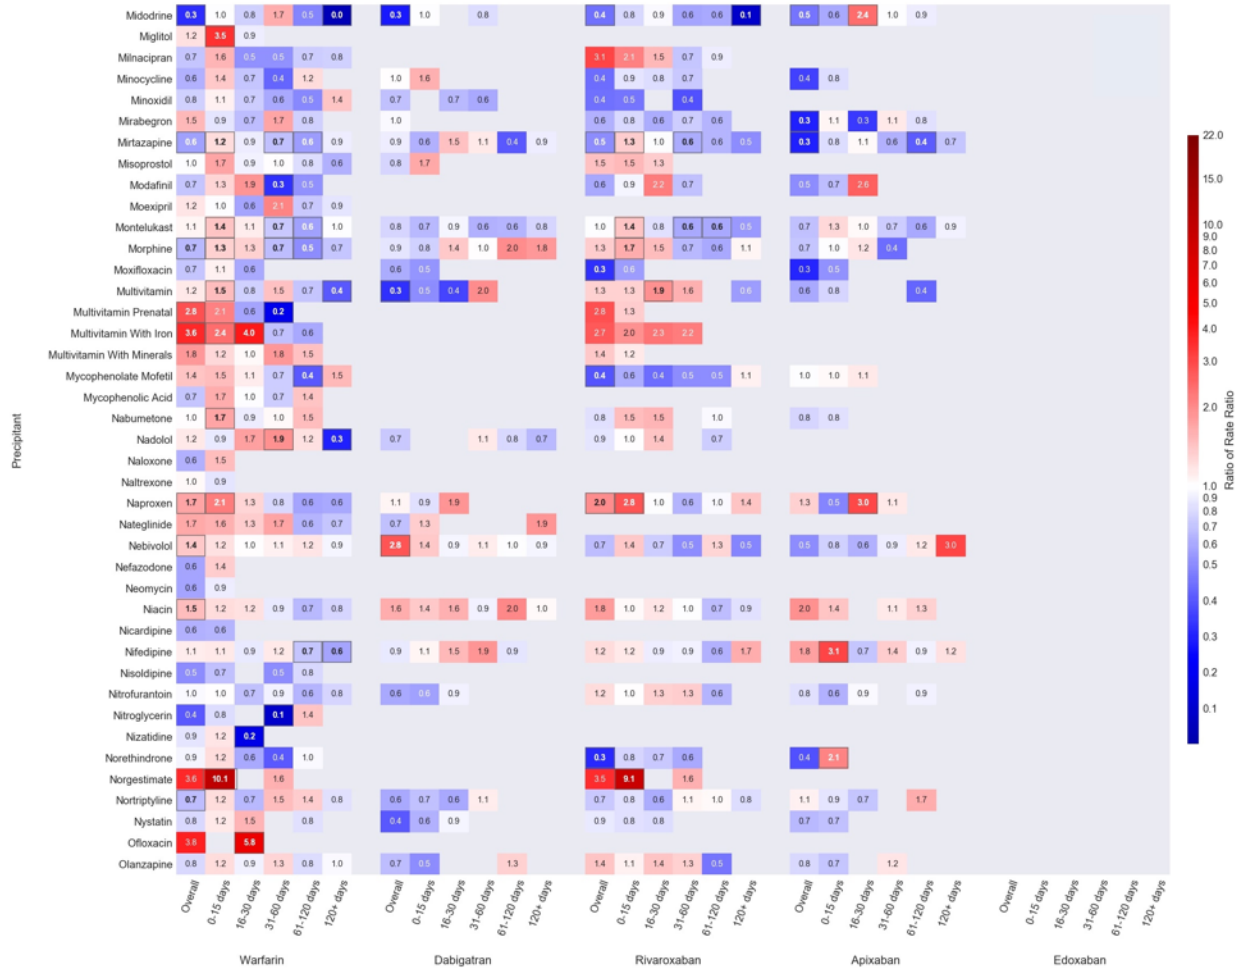

Precipitants are listed alphabetically. Ratio of rate ratios highlighted with bold text and a dark grey box are statistically significant ( $p < 0.05$ ). Panel H includes precipitants from midodrine to olanzapine.

Figure S3. Continued.

I

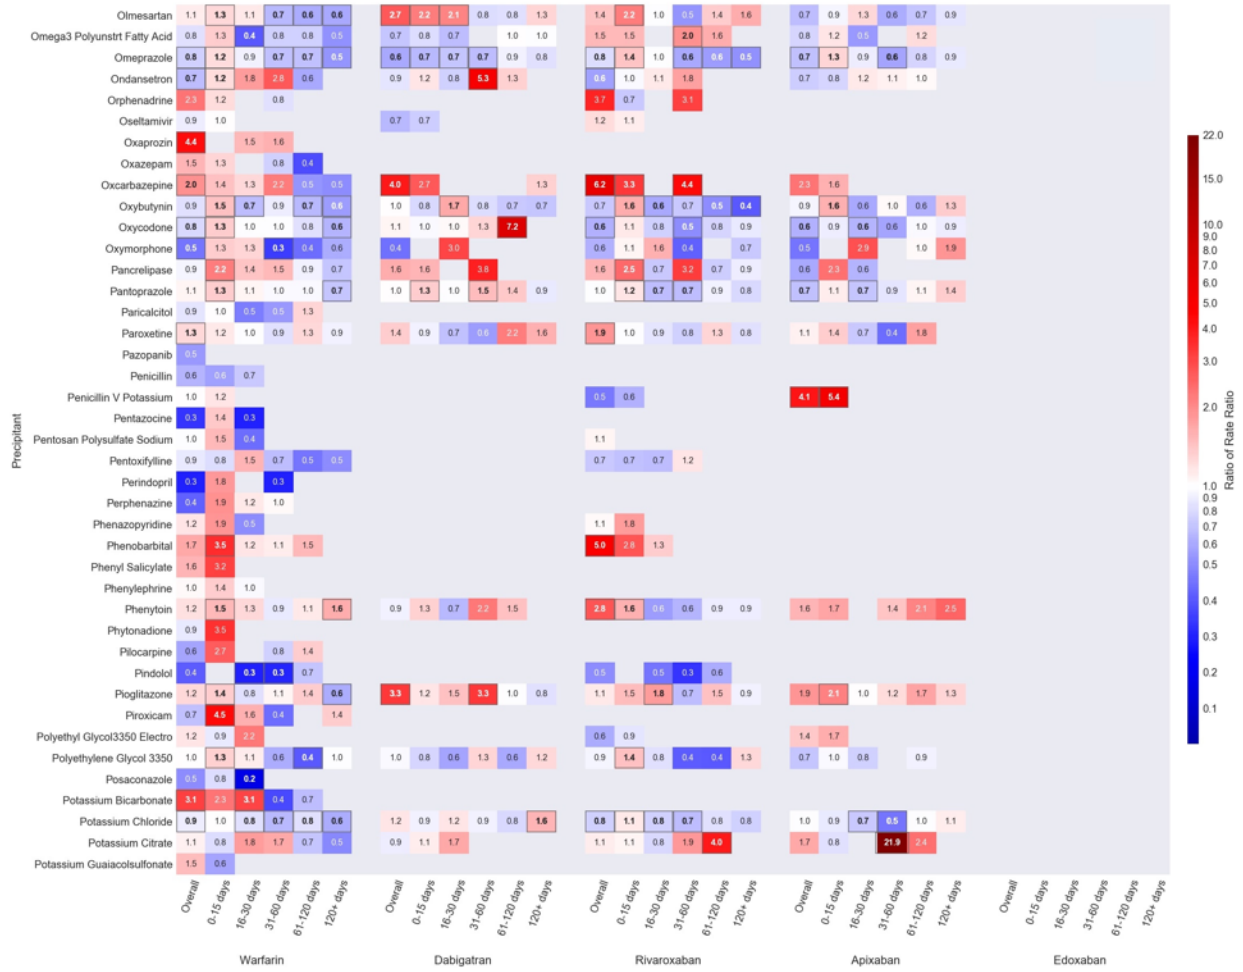

Precipitants are listed alphabetically. Ratio of rate ratios highlighted with bold text and a dark grey box are statistically significant ( $p < 0.05$ ). Panel I includes precipitants from olmesartan to potassium guaiacolsulfonate.

Figure S3. Continued.

J

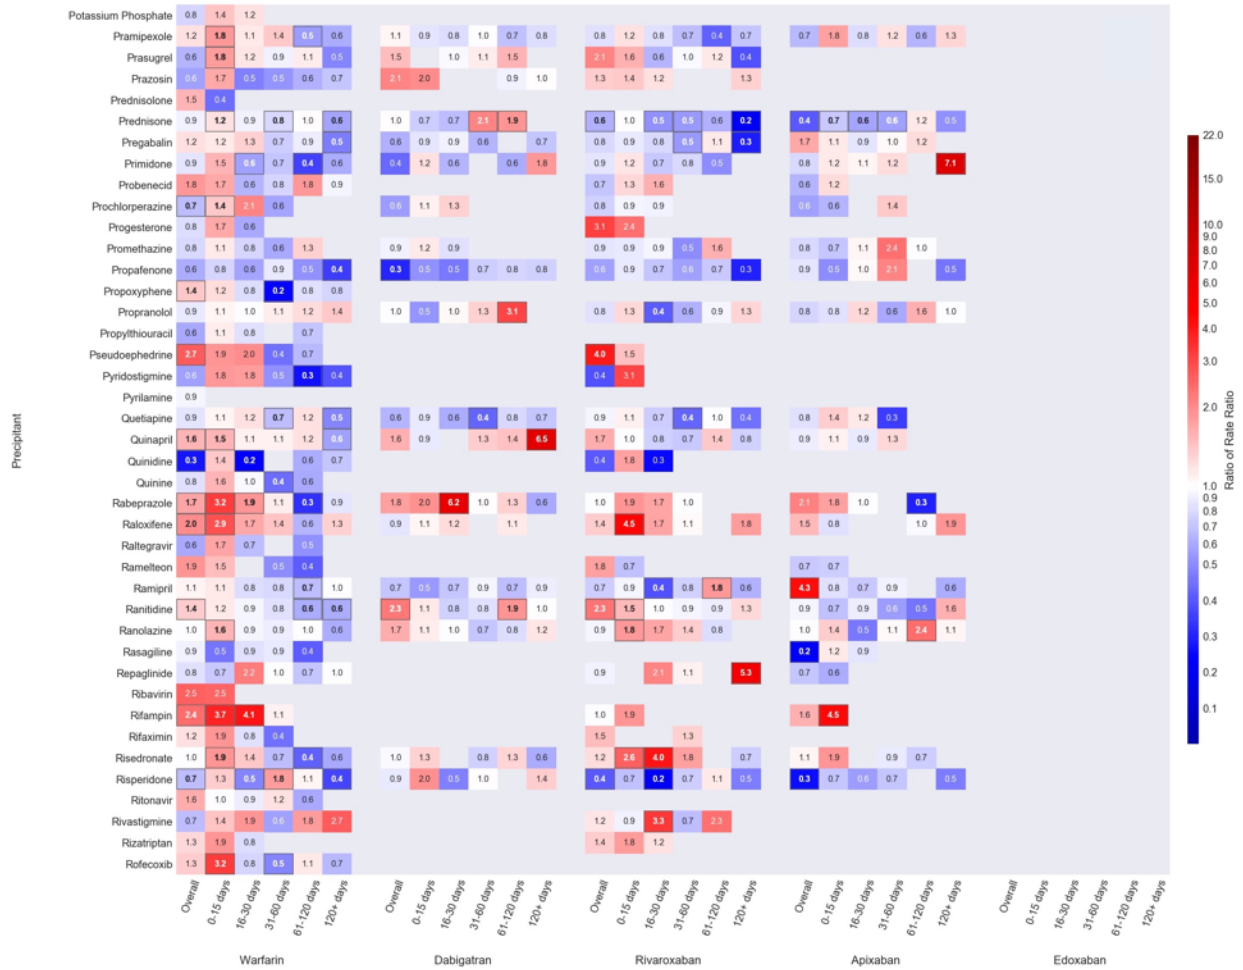

Precipitants are listed alphabetically. Ratio of rate ratios highlighted with bold text and a dark grey box are statistically significant (p<0.05). Panel J includes precipitants from potassium phosphate rofecoxib.

Figure S3. Continued.  
K

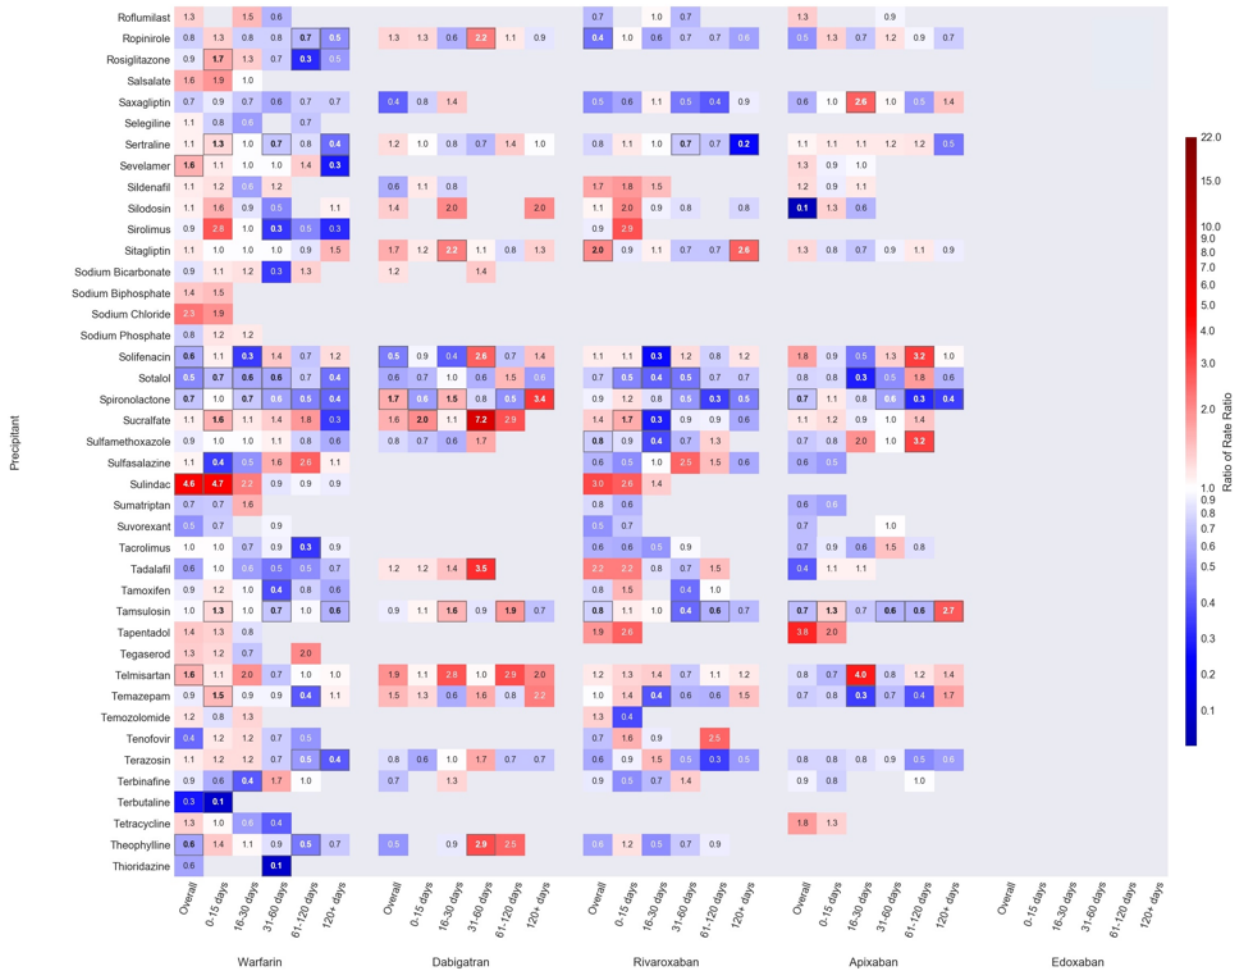

Precipitants are listed alphabetically. Ratio of rate ratios highlighted with bold text and a dark grey box are statistically significant (p<0.05). Panel K includes precipitants from roflumilast to thioridazine.

**Figure S3.** Continued.  
L

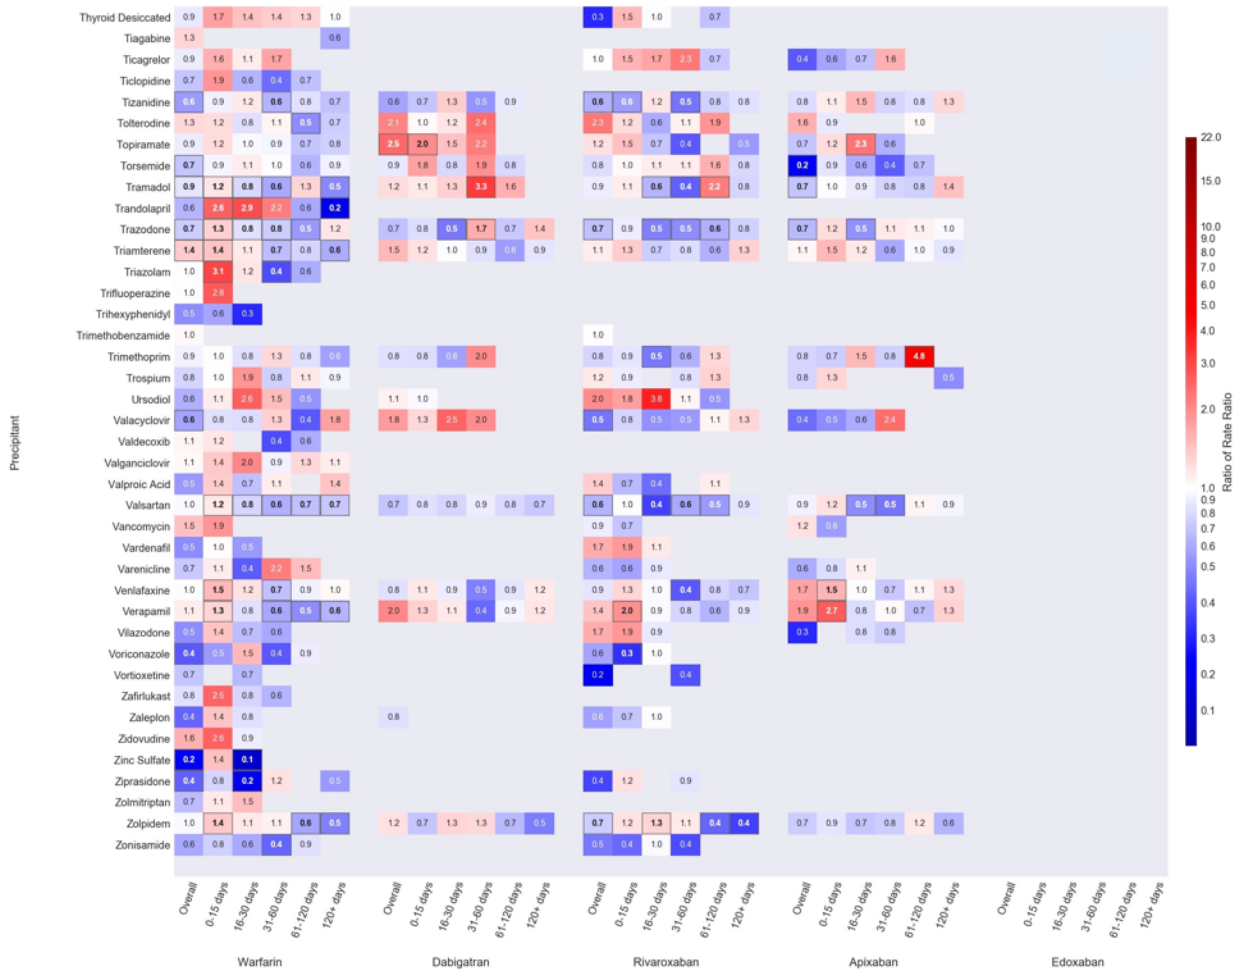

Precipitants are listed alphabetically. Ratio of rate ratios highlighted with bold text and a dark grey box are statistically significant ( $p < 0.05$ ). Panel L includes precipitants from thyroid desiccated to zonisamide.



**Figure S4.** Heatmaps presenting rate ratios comparing precipitant exposed time vs. precipitant unexposed time in the secondary analysis.

A

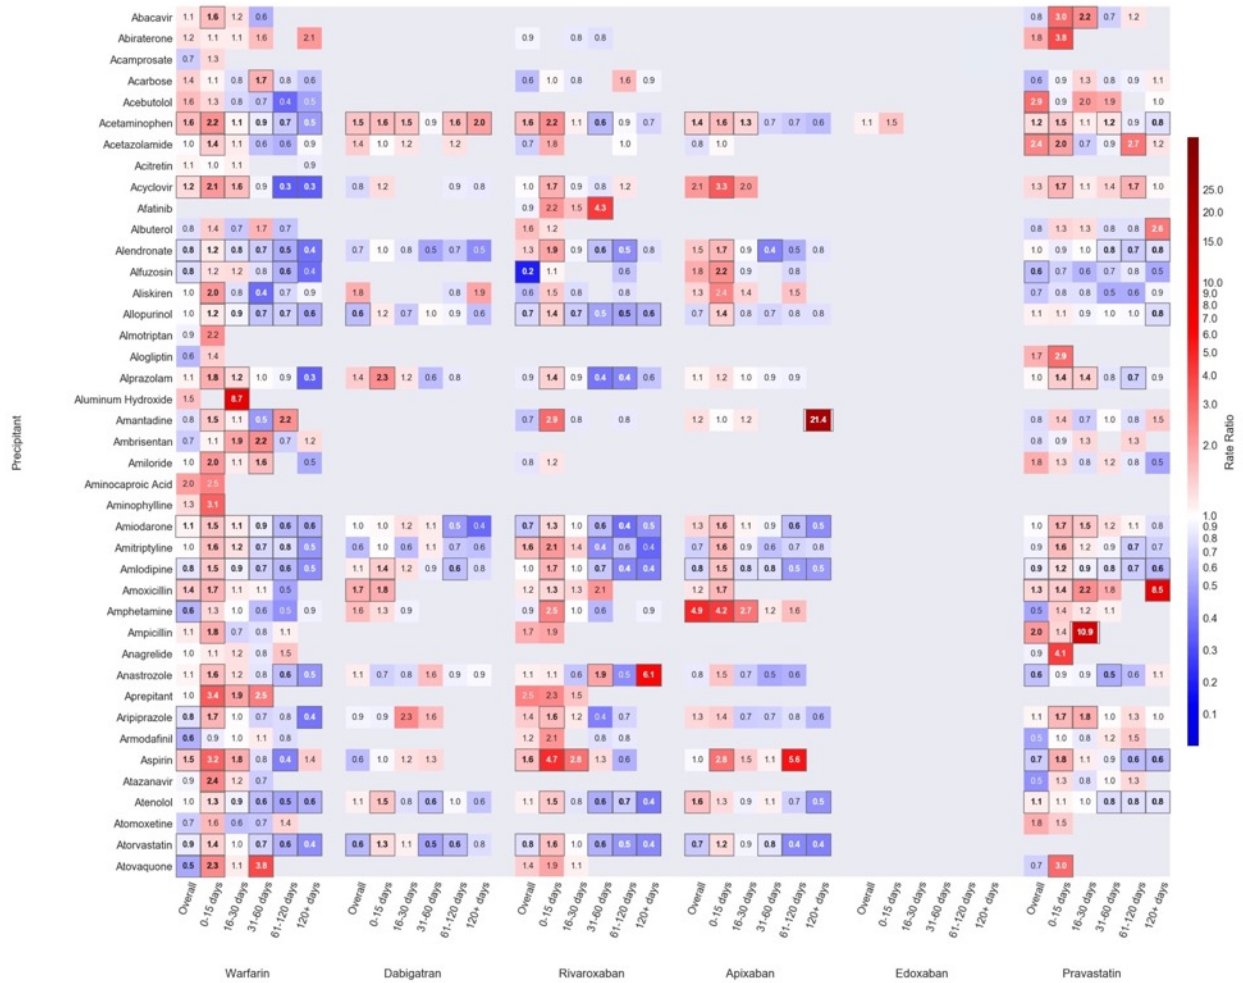

Precipitants are listed alphabetically. Rate ratios highlighted with bold text and a dark grey box are statistically significant (p < 0.05). Panel A includes precipitants from abacavir to atovaquone.

Figure S4. Continued.

B

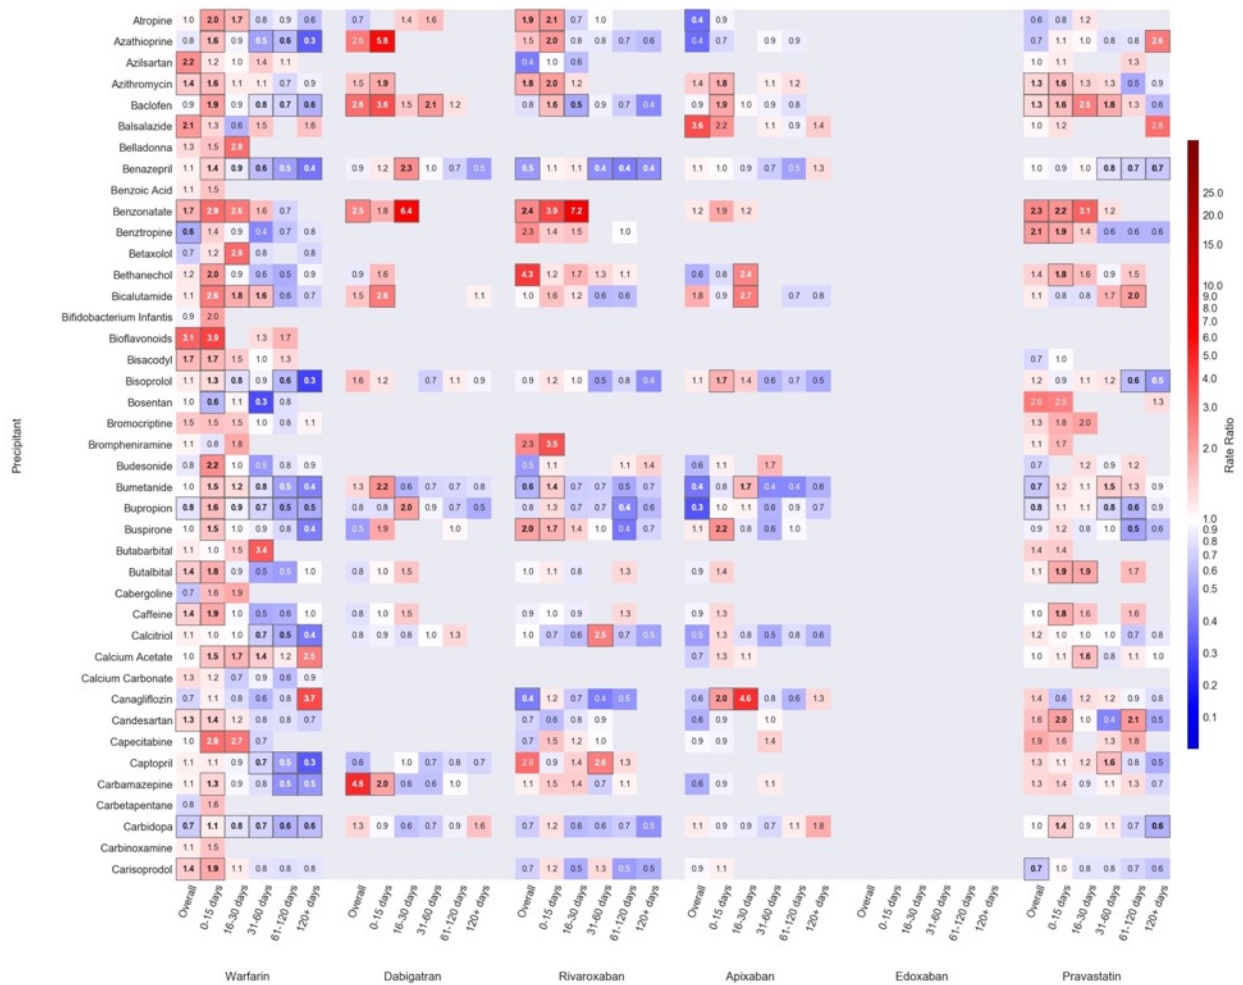

Precipitants are listed alphabetically. Rate ratios highlighted with bold text and a dark grey box are statistically significant ( $p < 0.05$ ). Panel B includes precipitants from atropine to carisoprodol.

Figure S4. Continued.

C

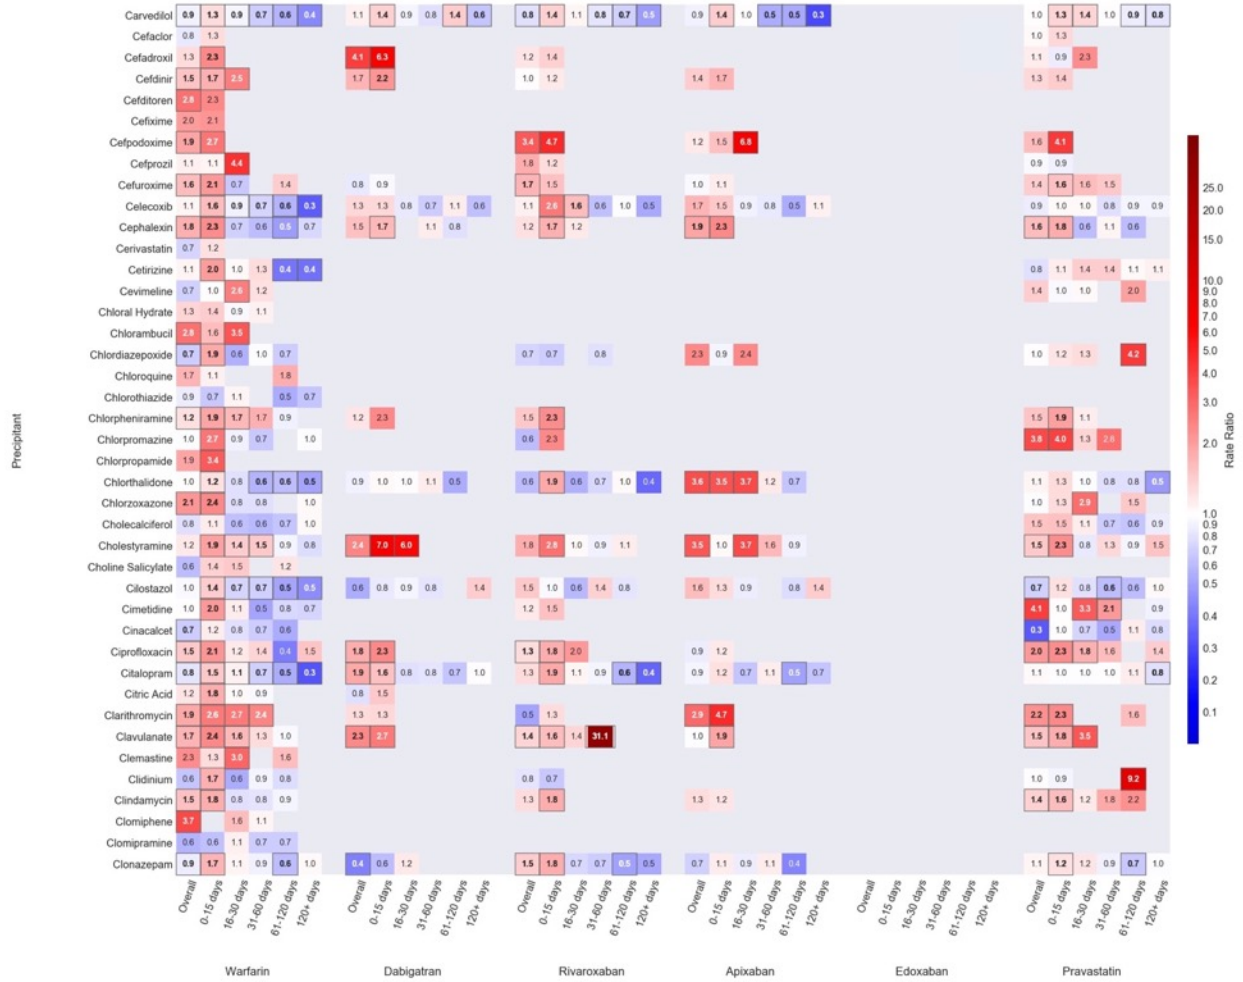

Precipitants are listed alphabetically. Rate ratios highlighted with bold text and a dark grey box are statistically significant ( $p < 0.05$ ). Panel C includes precipitants from carvedilol to clonazepam.

Figure S4. Continued.

D

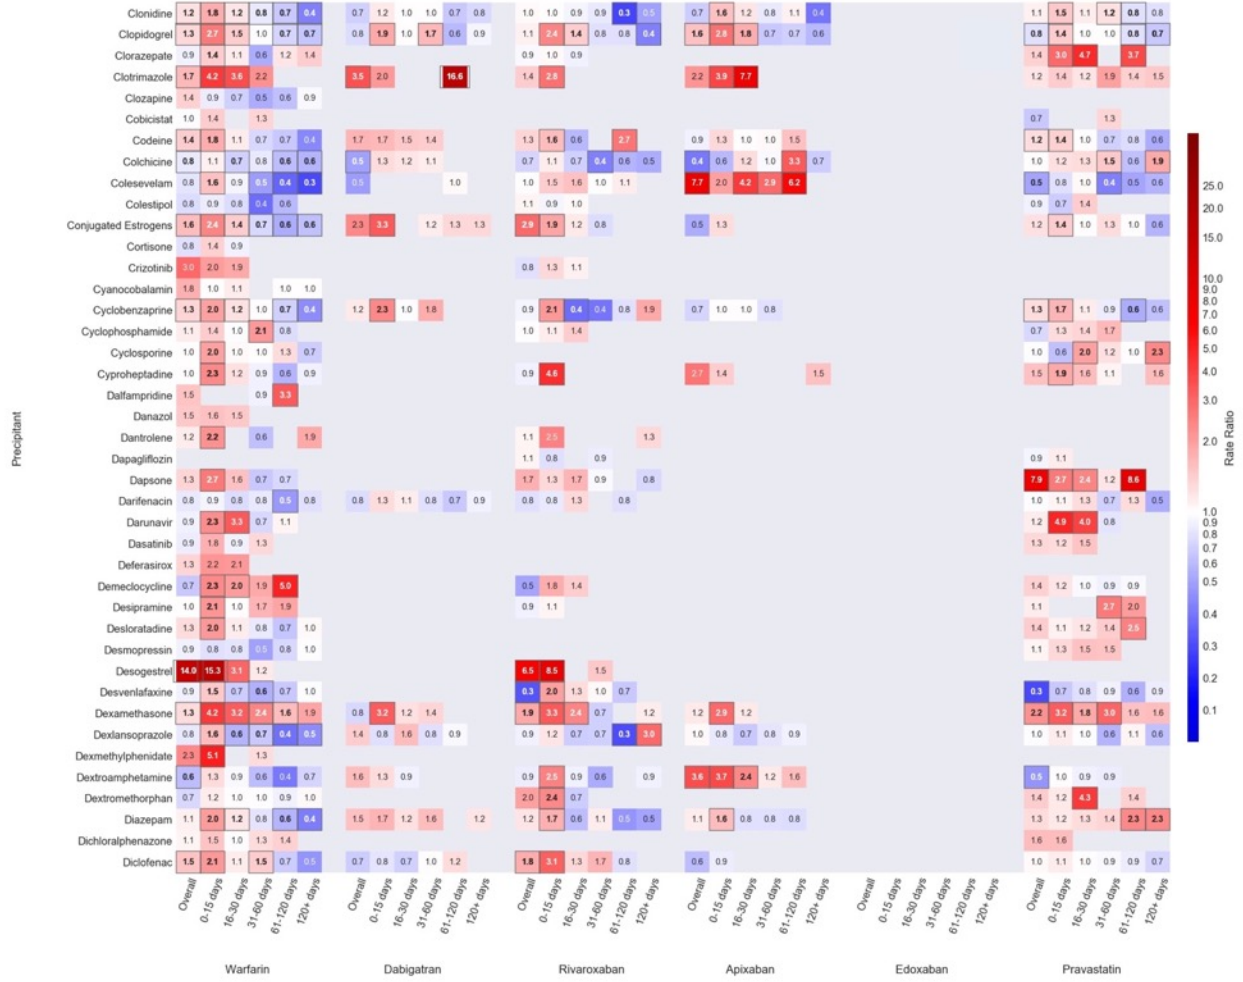

Precipitants are listed alphabetically. Rate ratios highlighted with bold text and a dark grey box are statistically significant (p < 0.05). Panel D includes precipitants from clonidine to diclofenac.

Figure S4. Continued.

E

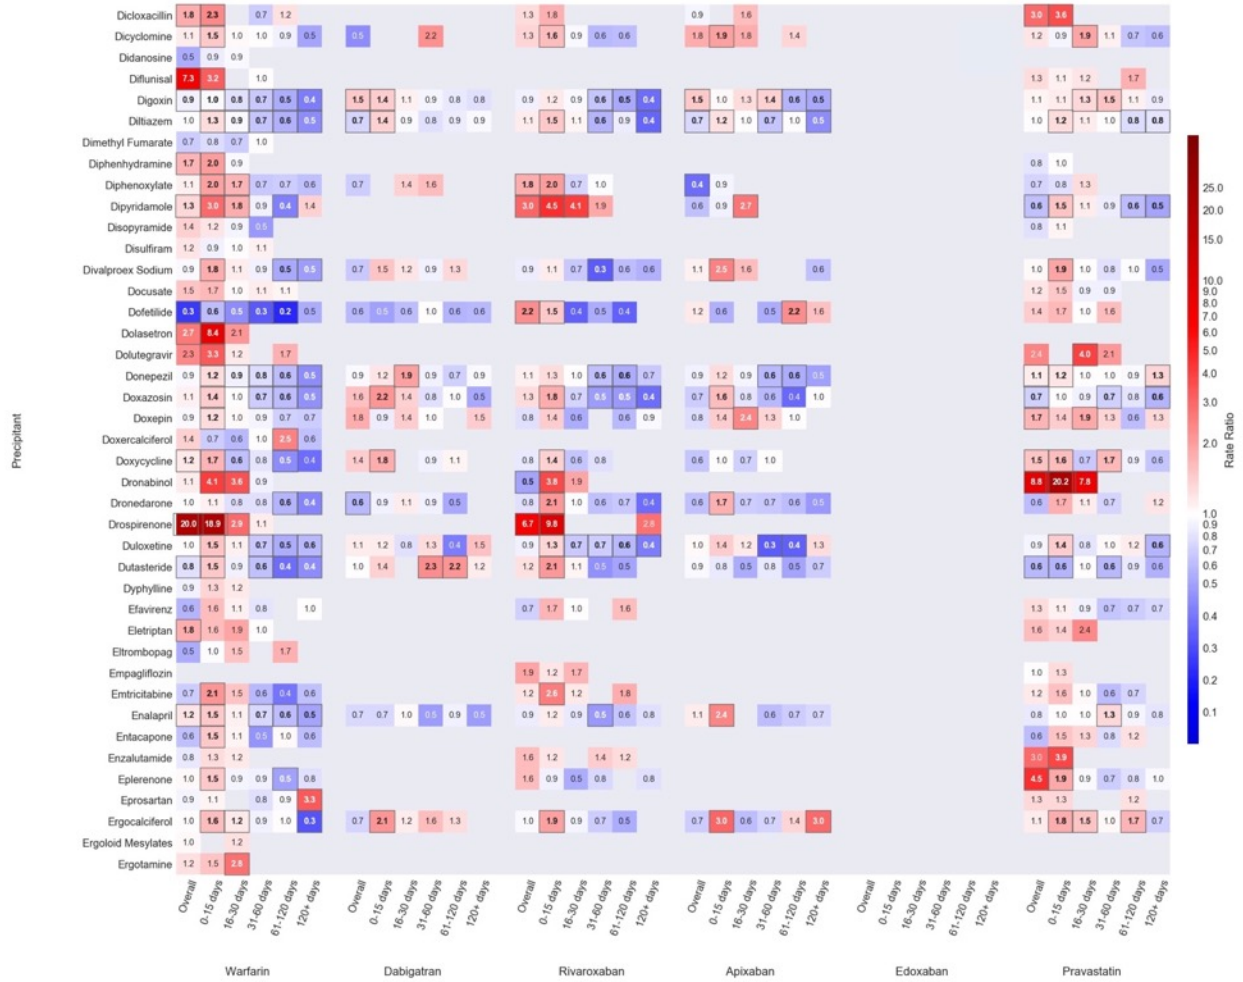

Precipitants are listed alphabetically. Rate ratios highlighted with bold text and a dark grey box are statistically significant ( $p < 0.05$ ). Panel E includes precipitants from dicloxacillin to ergotamine.

Figure S4. Continued.

F

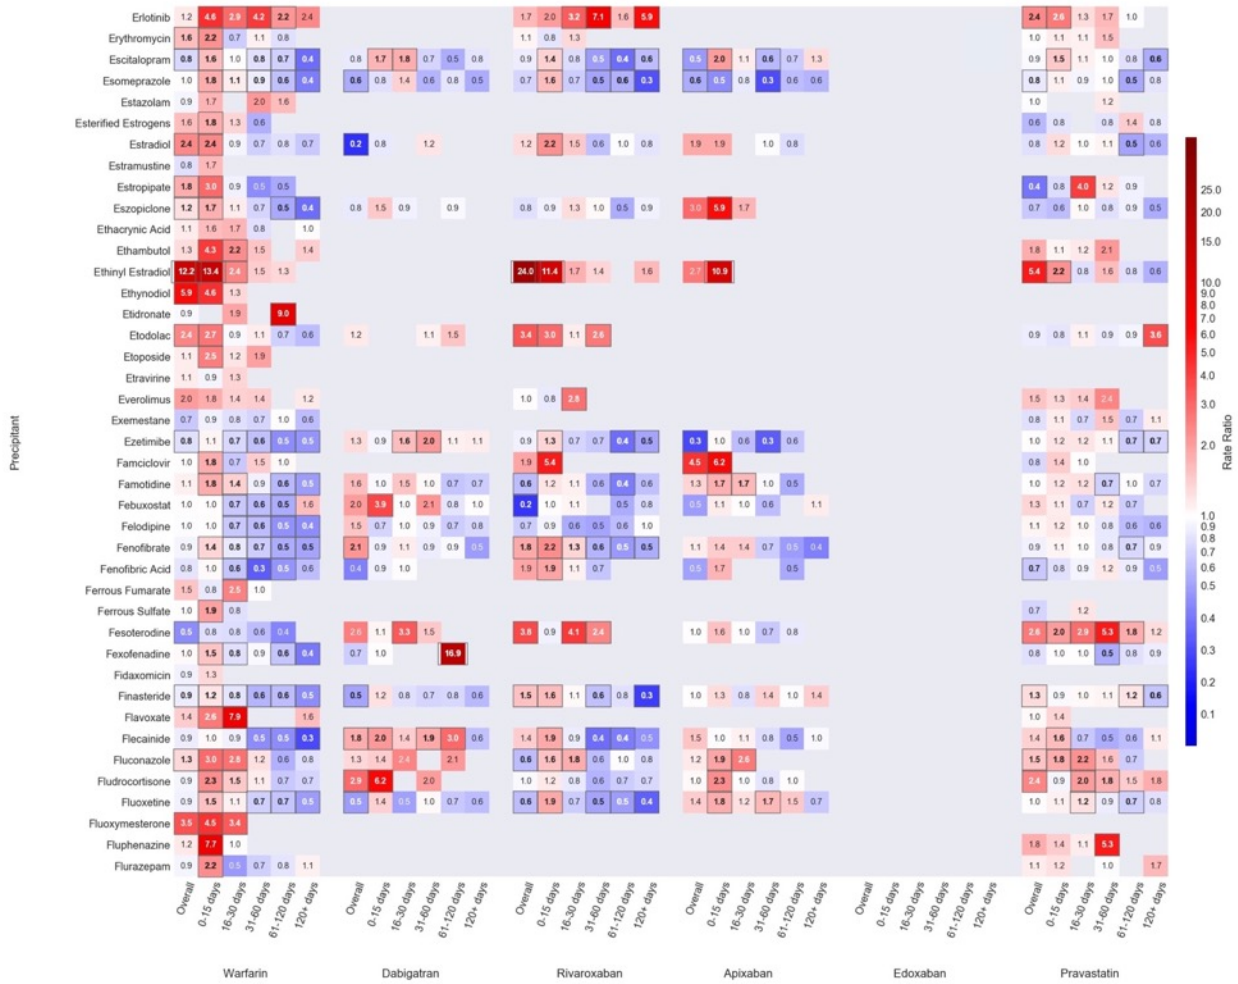

Precipitants are listed alphabetically. Rate ratios highlighted with bold text and a dark grey box are statistically significant ( $p < 0.05$ ). Panel F includes precipitants from erlotinib to flurazepam.

Figure S4. Continued.  
G

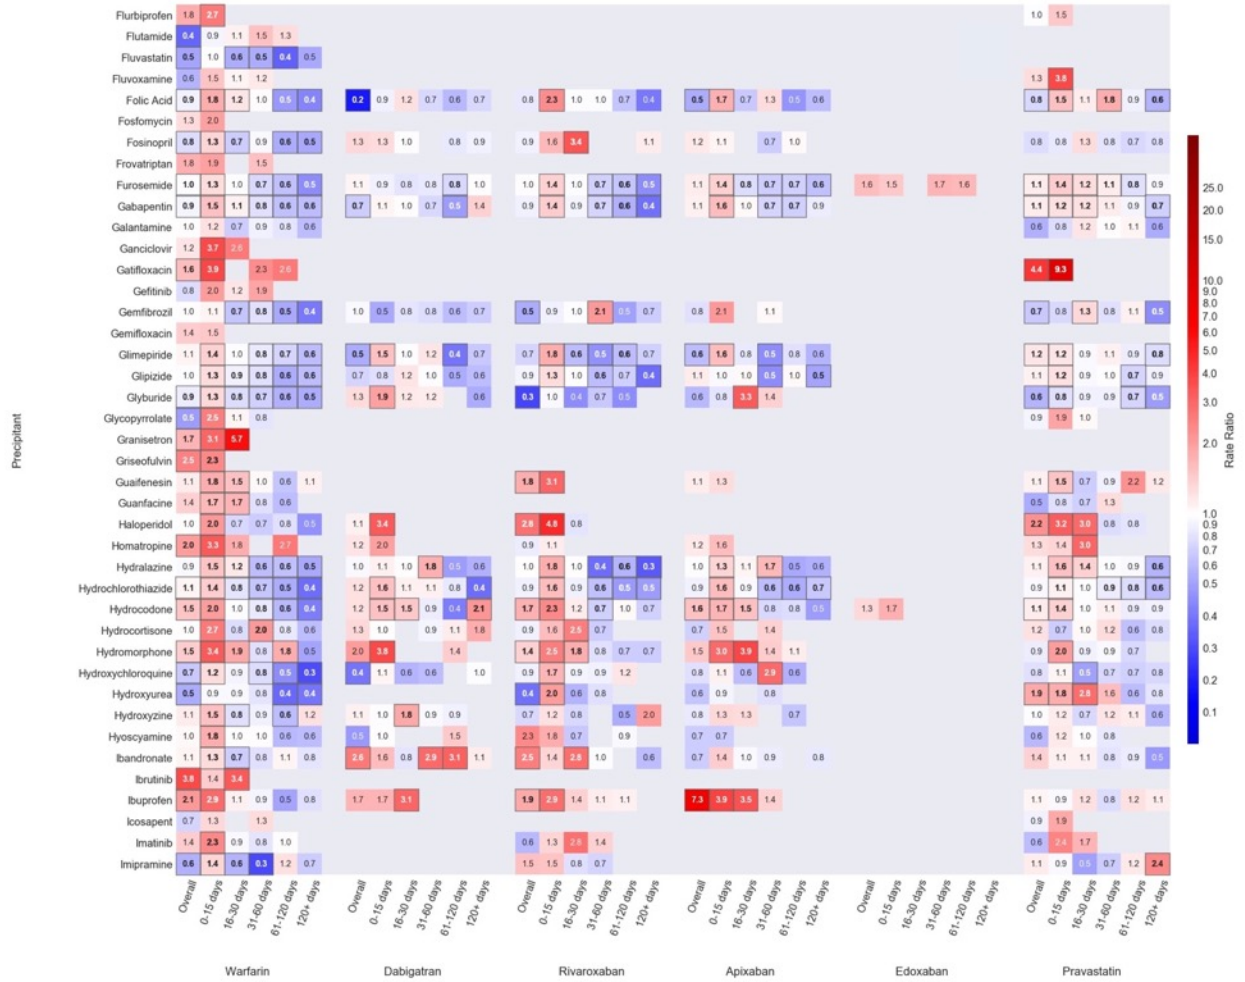

Precipitants are listed alphabetically. Rate ratios highlighted with bold text and a dark grey box are statistically significant (p < 0.05). Panel G includes precipitants from flurbiprofen to imipramine.

Figure S4. Continued.

H

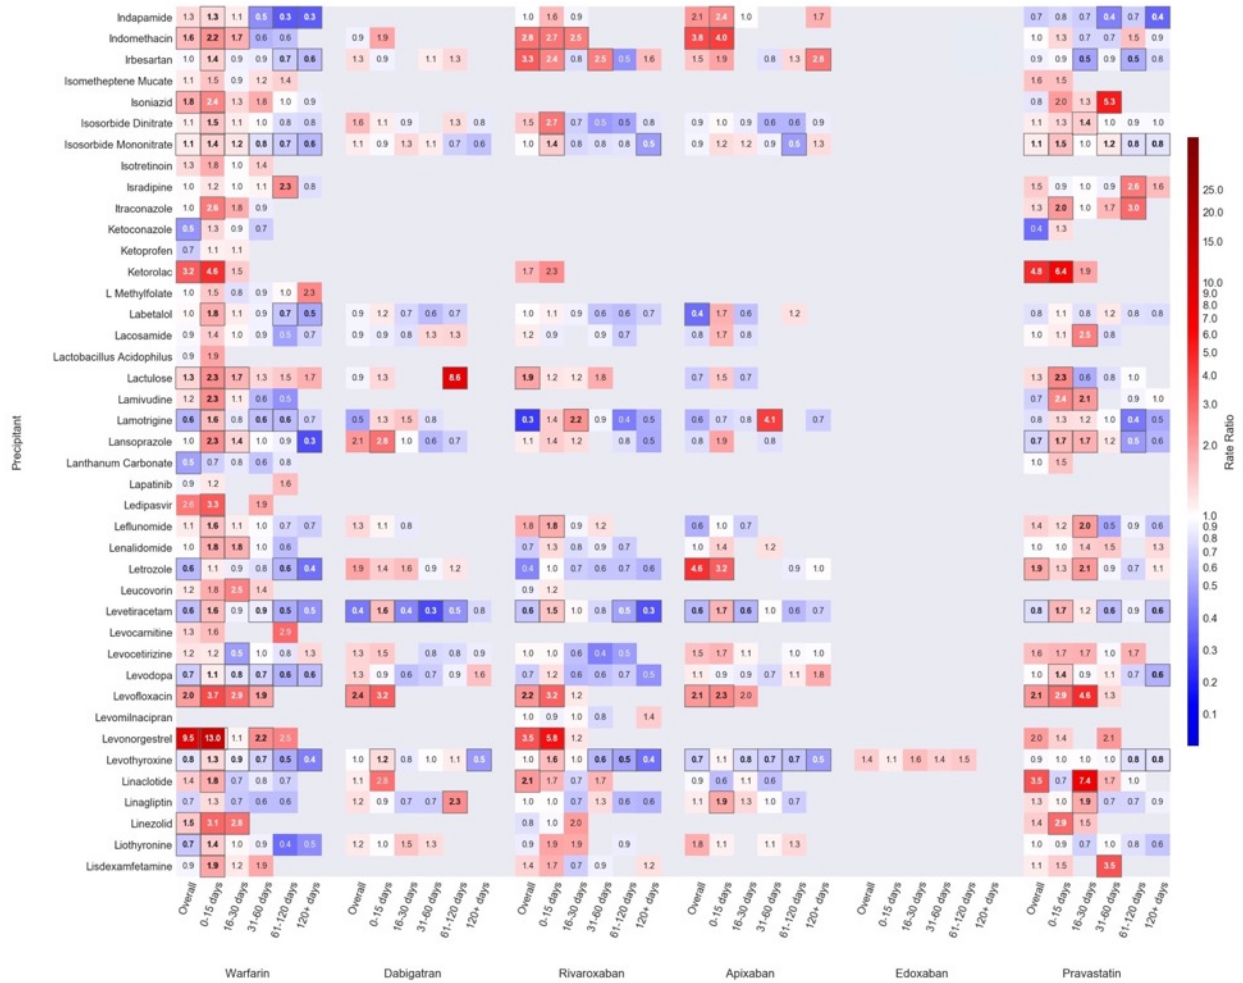

Precipitants are listed alphabetically. Rate ratios highlighted with bold text and a dark grey box are statistically significant (p < 0.05). Panel H includes precipitants from indapamide to lisdexamfetamine.



Figure S4. Continued.

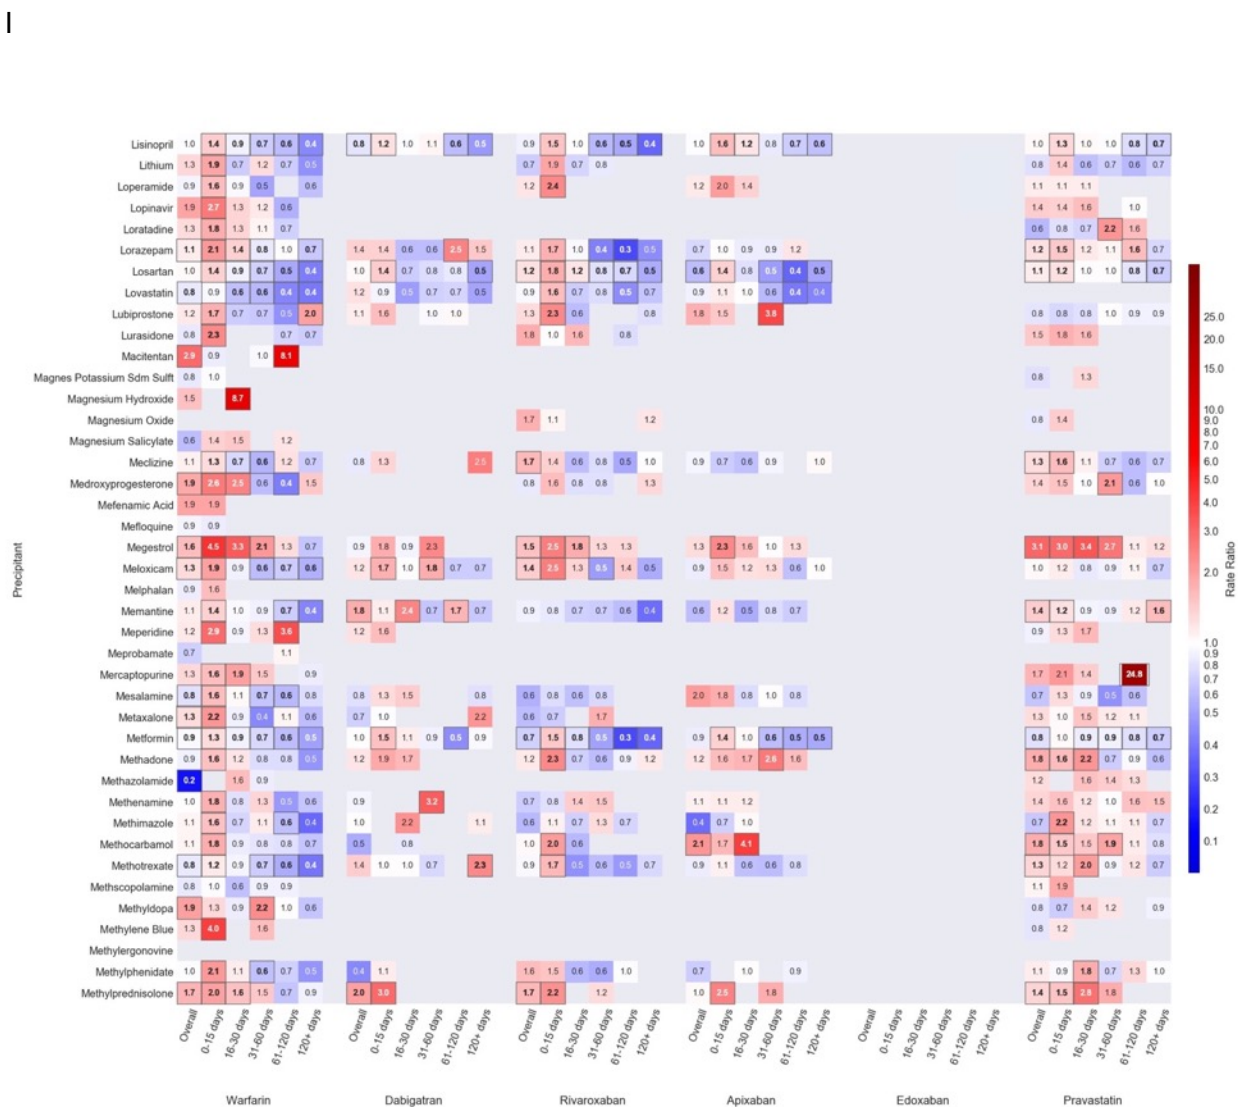

Precipitants are listed alphabetically. Rate ratios highlighted with bold text and a dark grey box are statistically significant (p < 0.05). Panel I includes precipitants from lisinopril to methylprednisolone.

Figure S4. Continued.

J

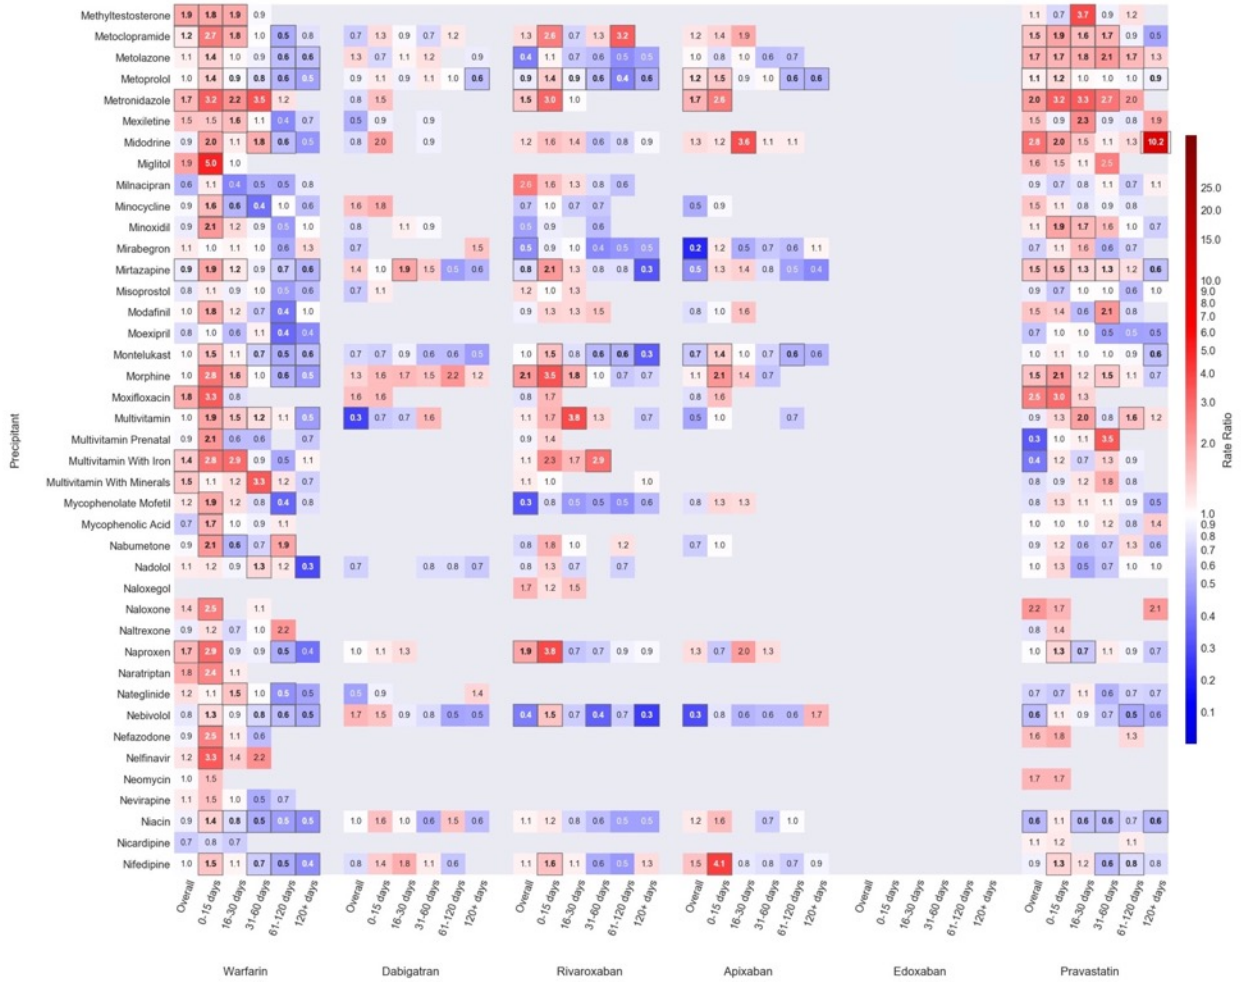

Precipitants are listed alphabetically. Rate ratios highlighted with bold text and a dark grey box are statistically significant (p<0.05). Panel J includes precipitants from methyltestosterone to nifedipine.

Figure S4. Continued.

K

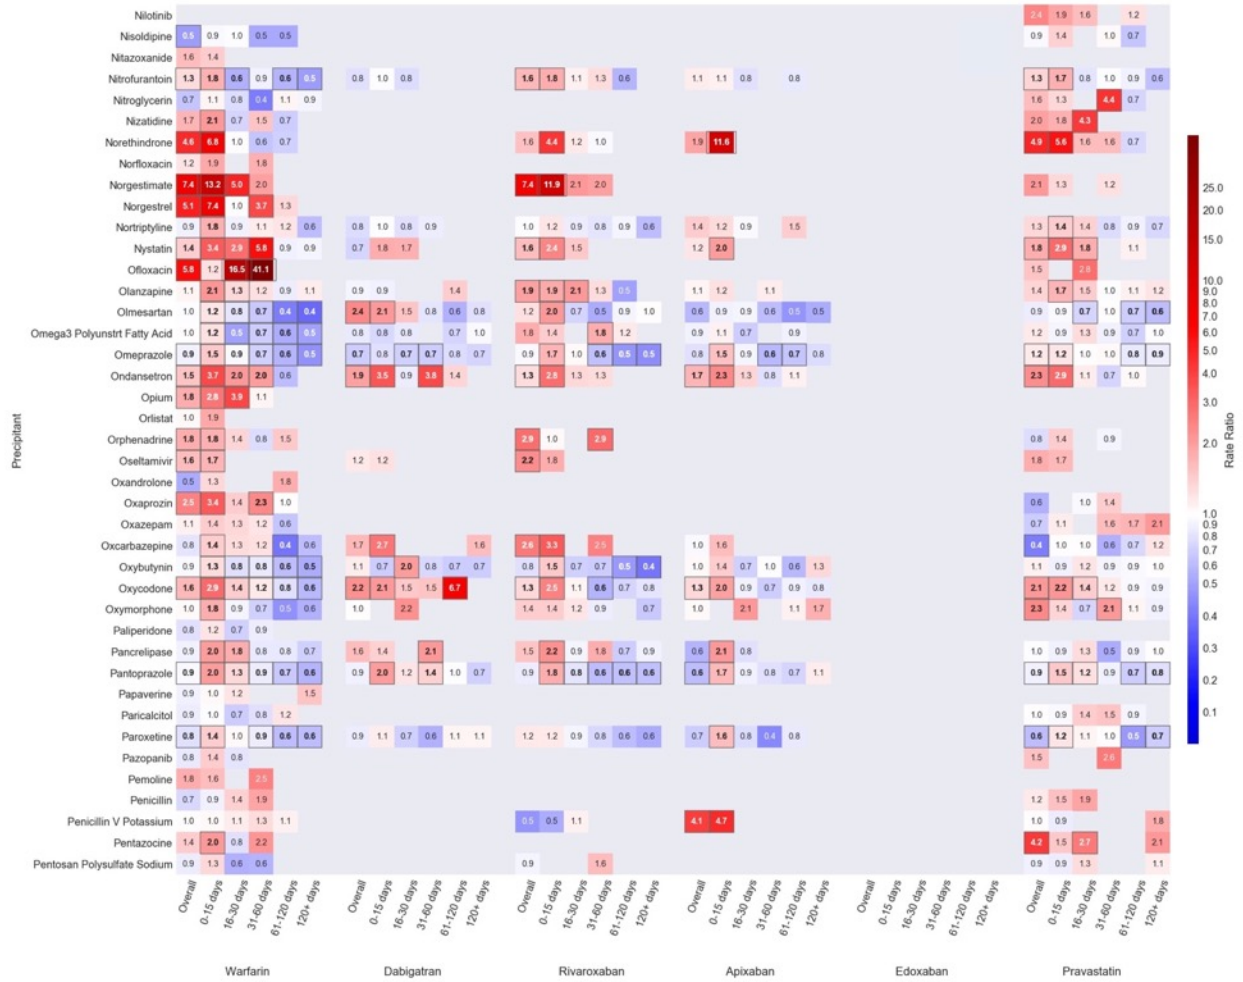

Precipitants are listed alphabetically. Rate ratios highlighted with bold text and a dark grey box are statistically significant ( $p < 0.05$ ). Panel K includes precipitants from nilotinib to pentosane polysulfate sodium.

Figure S4. Continued.

L

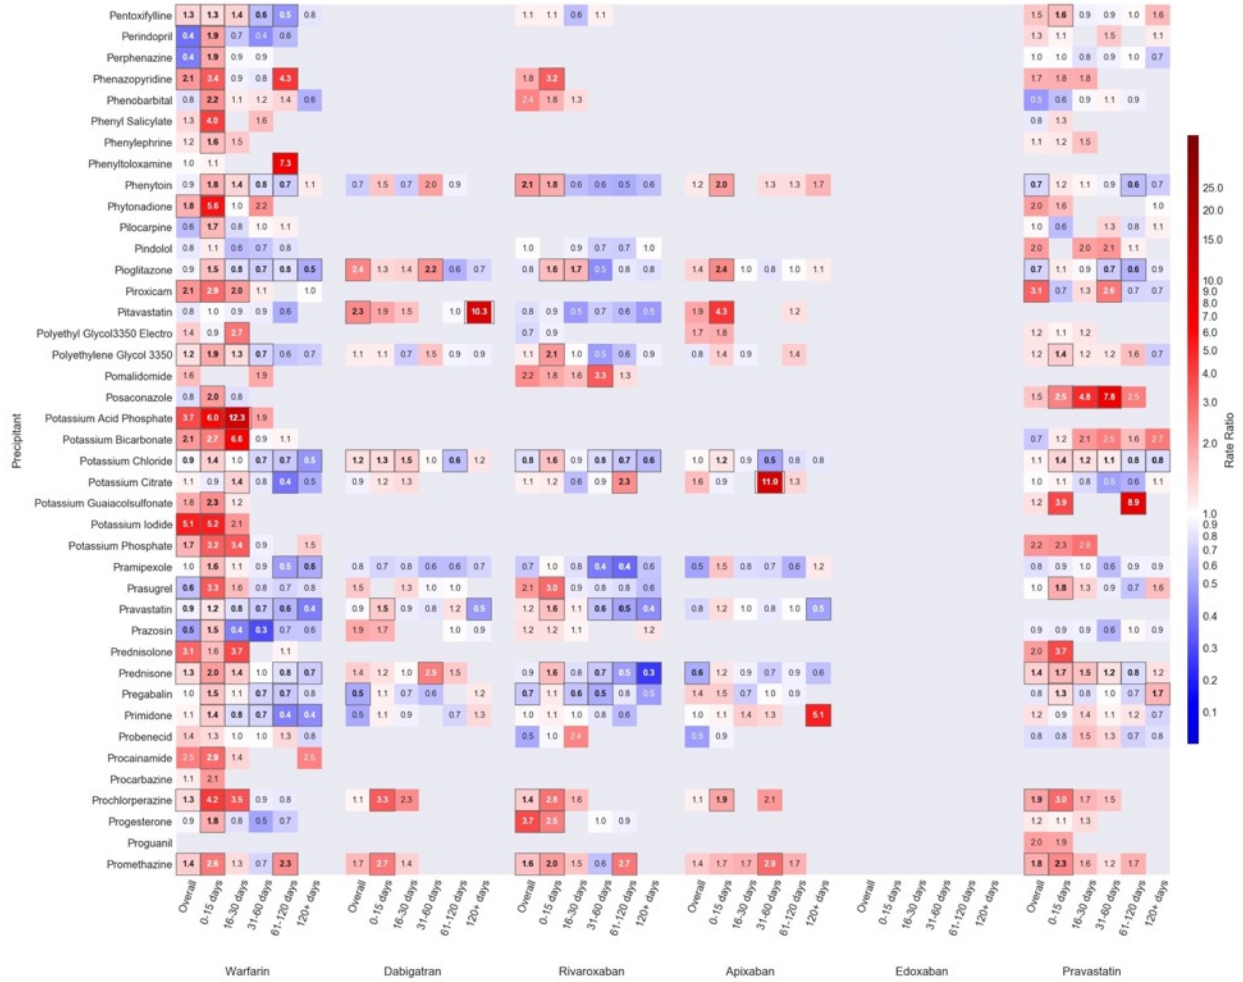

Precipitants are listed alphabetically. Rate ratios highlighted with bold text and a dark grey box are statistically significant (p<0.05). Panel L includes precipitants from pentoxifylline to promethazine.

Figure S4. Continued.

M

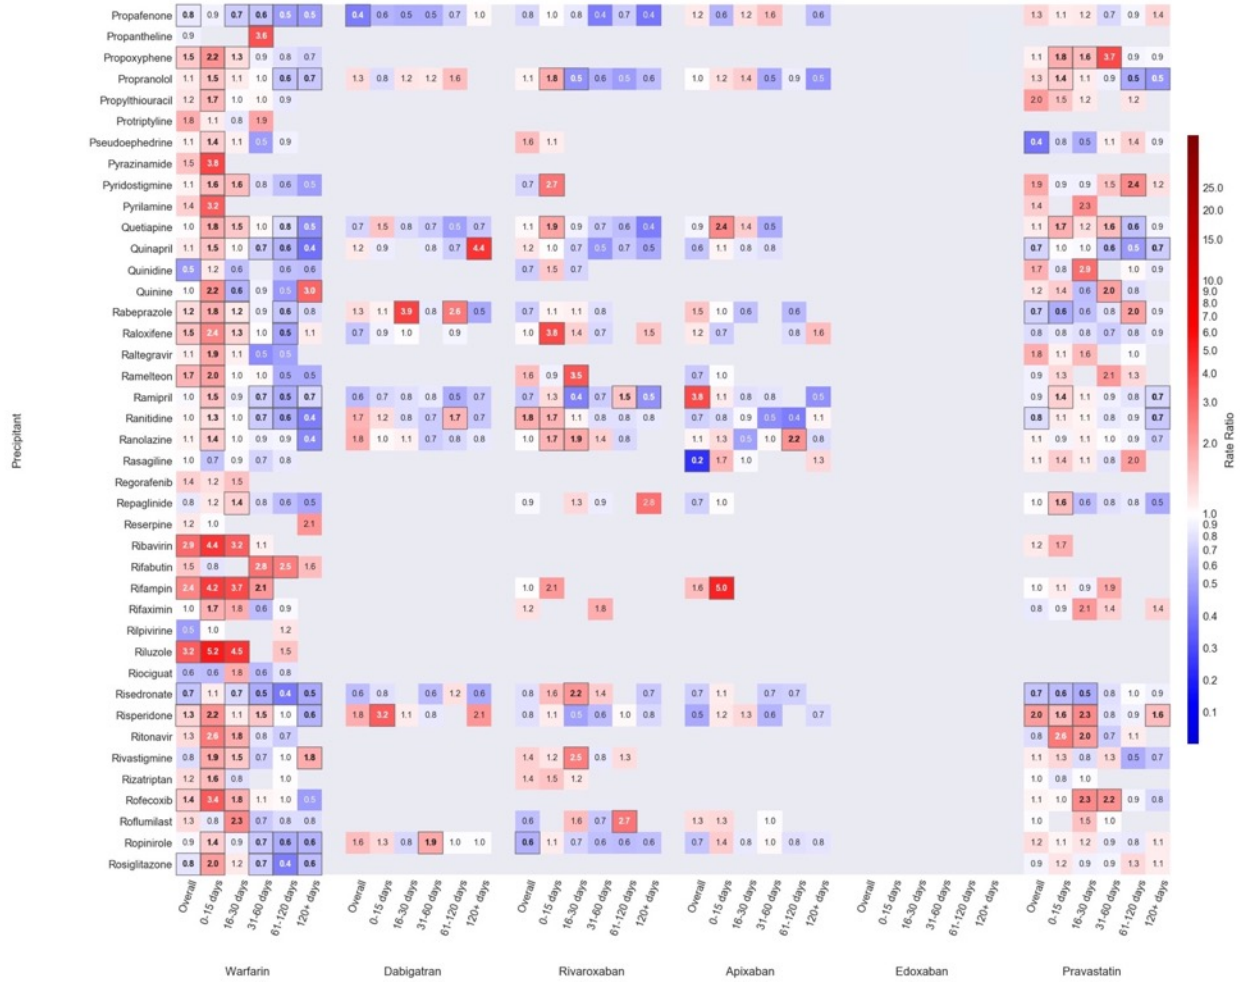

Precipitants are listed alphabetically. Rate ratios highlighted with bold text and a dark grey box are statistically significant (p < 0.05). Panel M includes precipitants from propafenone to rosiglitazone.

Figure S4. Continued.

N

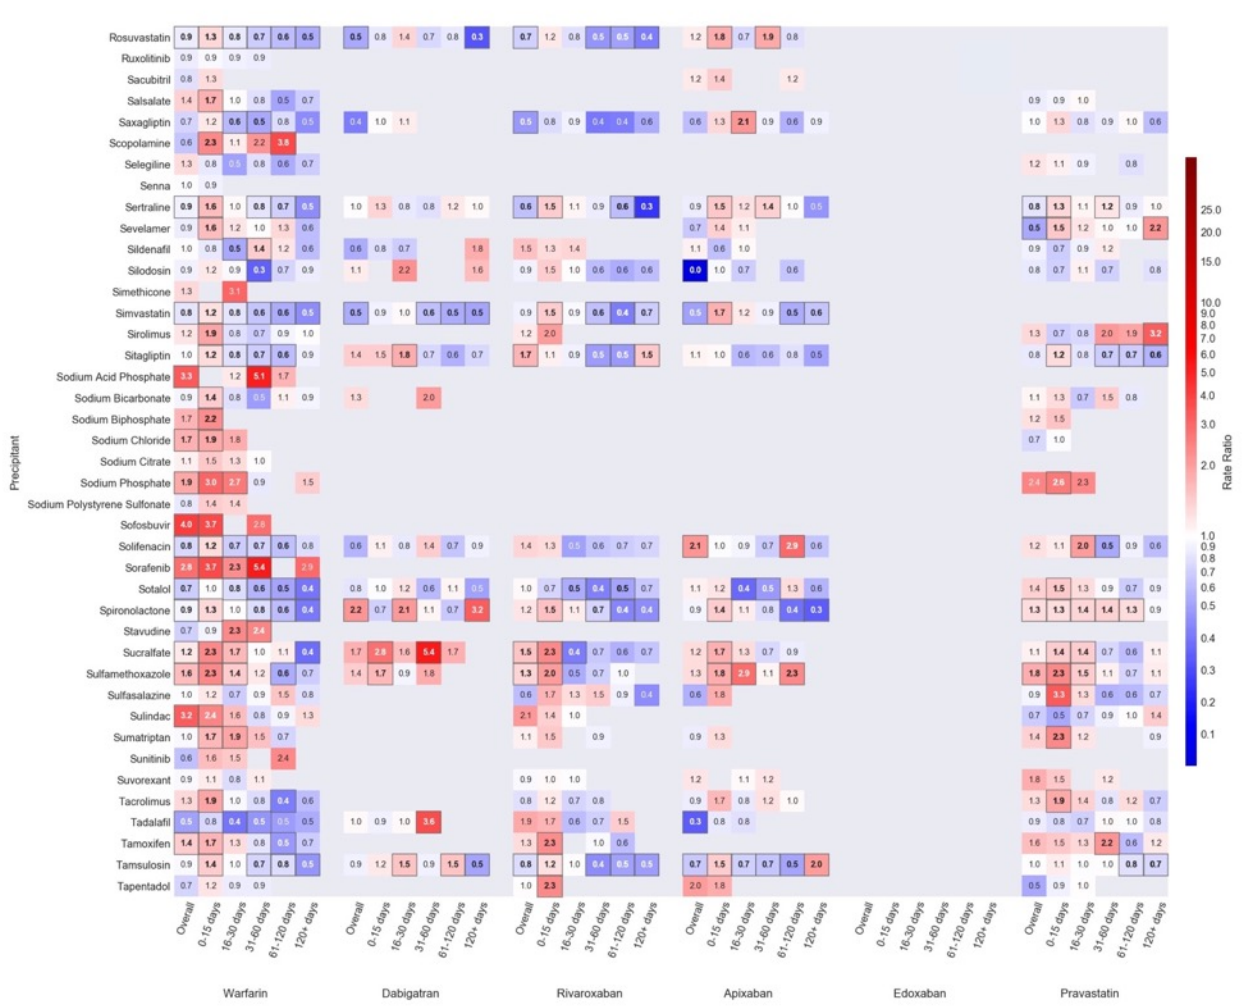

Precipitants are listed alphabetically. Rate ratios highlighted with bold text and a dark grey box are statistically significant (p < 0.05). Panel N includes precipitants from rosuvastatin to tapentadol.

Figure S4. Continued.

O

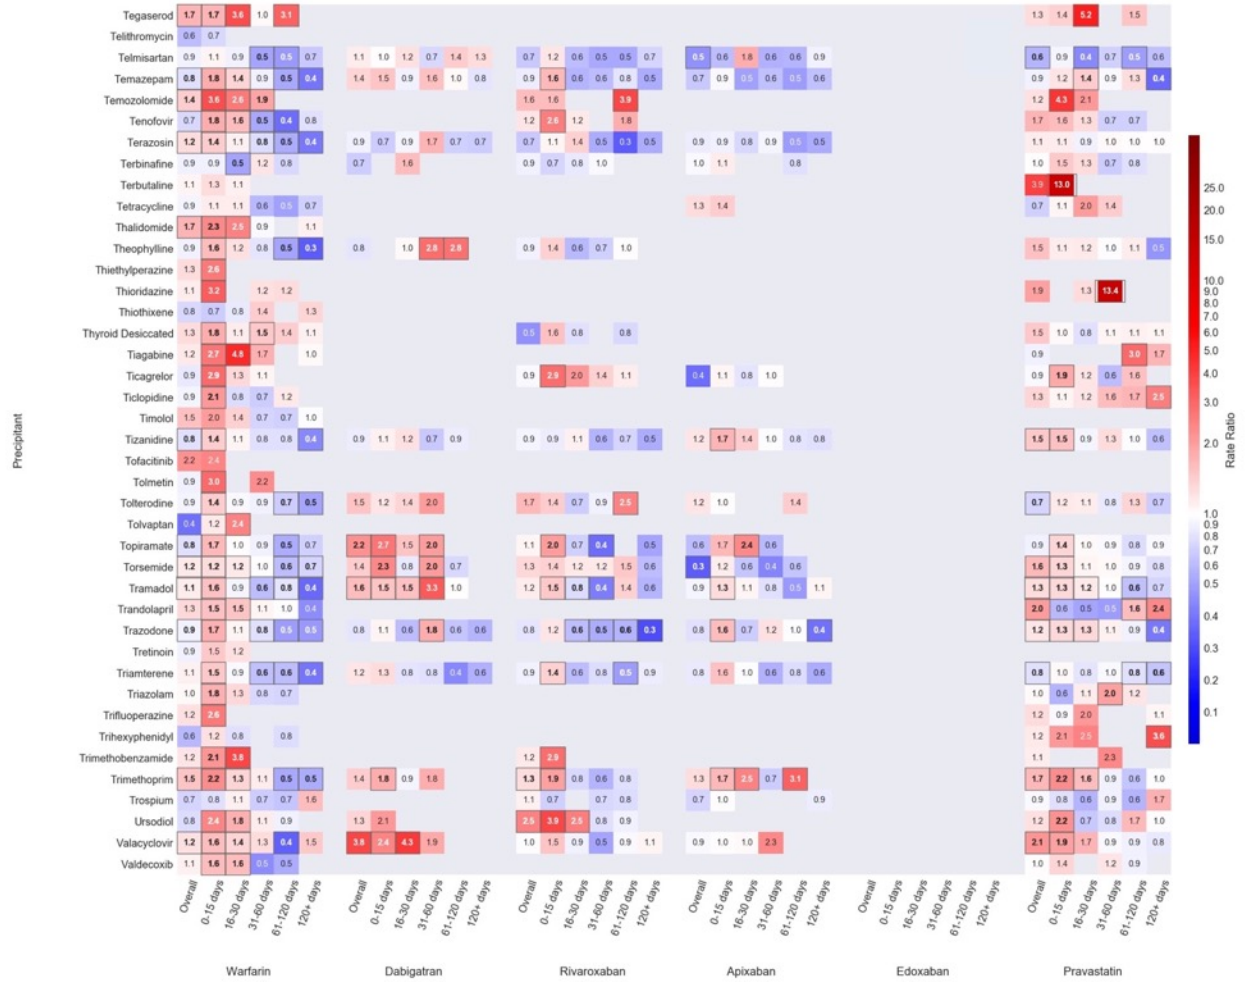

Precipitants are listed alphabetically. Rate ratios highlighted with bold text and a dark grey box are statistically significant (p < 0.05). Panel O includes precipitants from tegaserod to valganciclovir.

Figure S4. Continued.

P

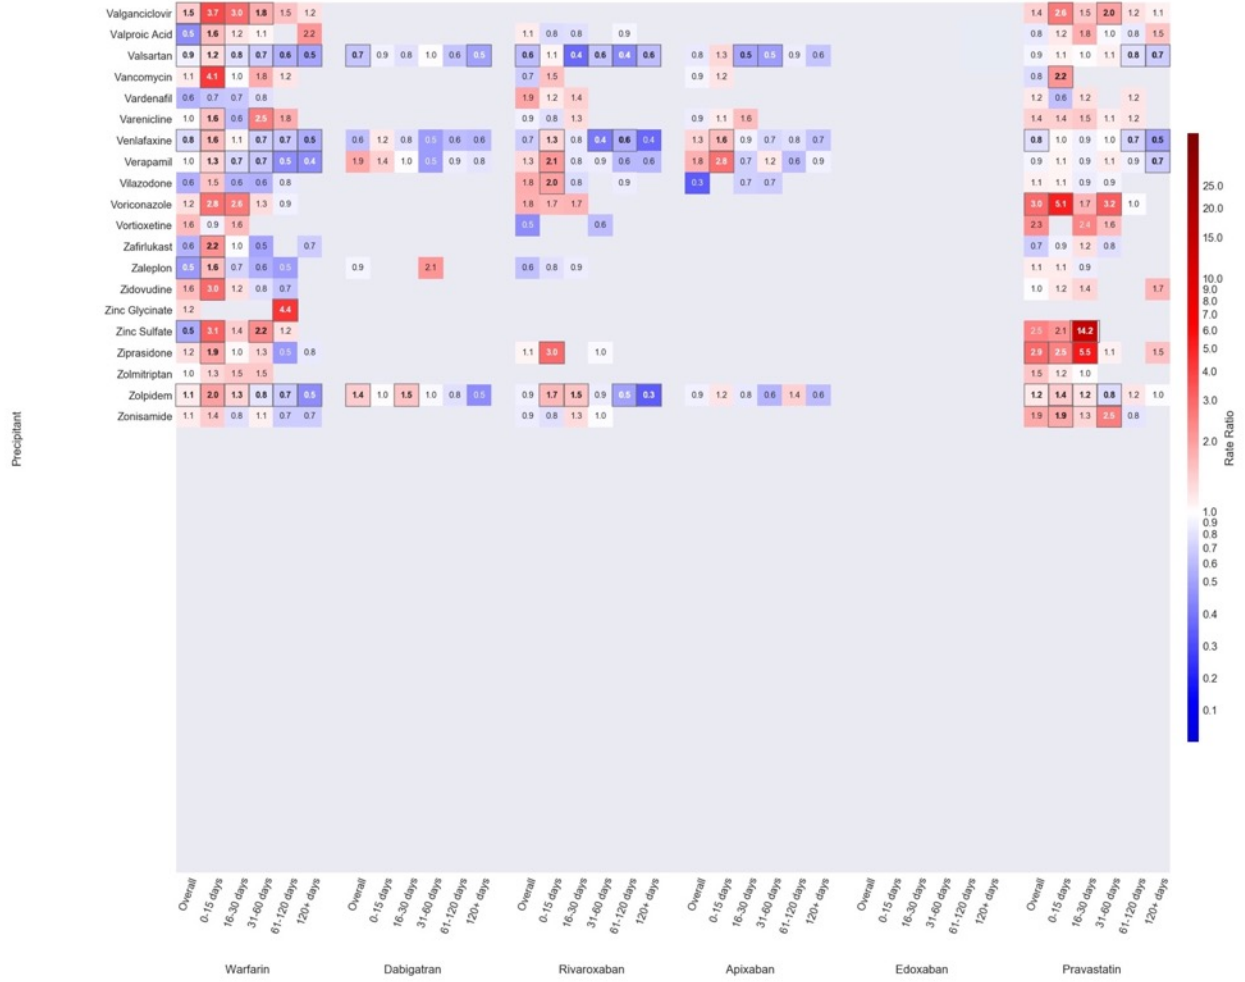

Precipitants are listed alphabetically. Rate ratios highlighted with bold text and a dark grey box are statistically significant ( $p < 0.05$ ). Panel P includes precipitants from valproic acid to zonisamide.



**Figure S5.** Heatmaps presenting the overall rate ratio comparing precipitant exposed time vs. precipitant unexposed time from the sensitivity analyses.

A

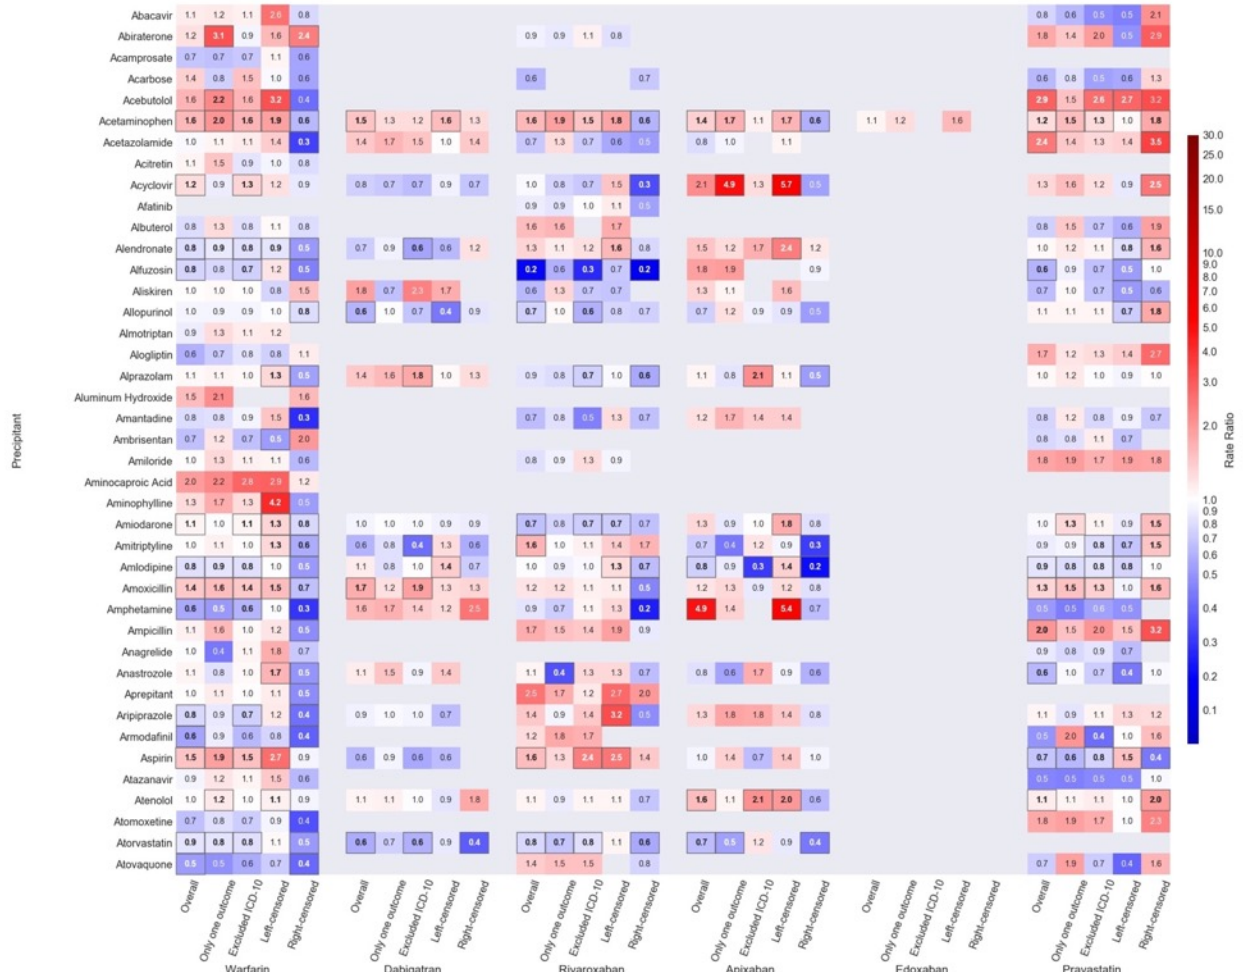

Precipitants are listed alphabetically. Rate ratios highlighted with bold text and a dark grey box are statistically significant (p < 0.05). Panel A includes precipitants from abacavir to atovaquone.

Figure S5. Continued.

B

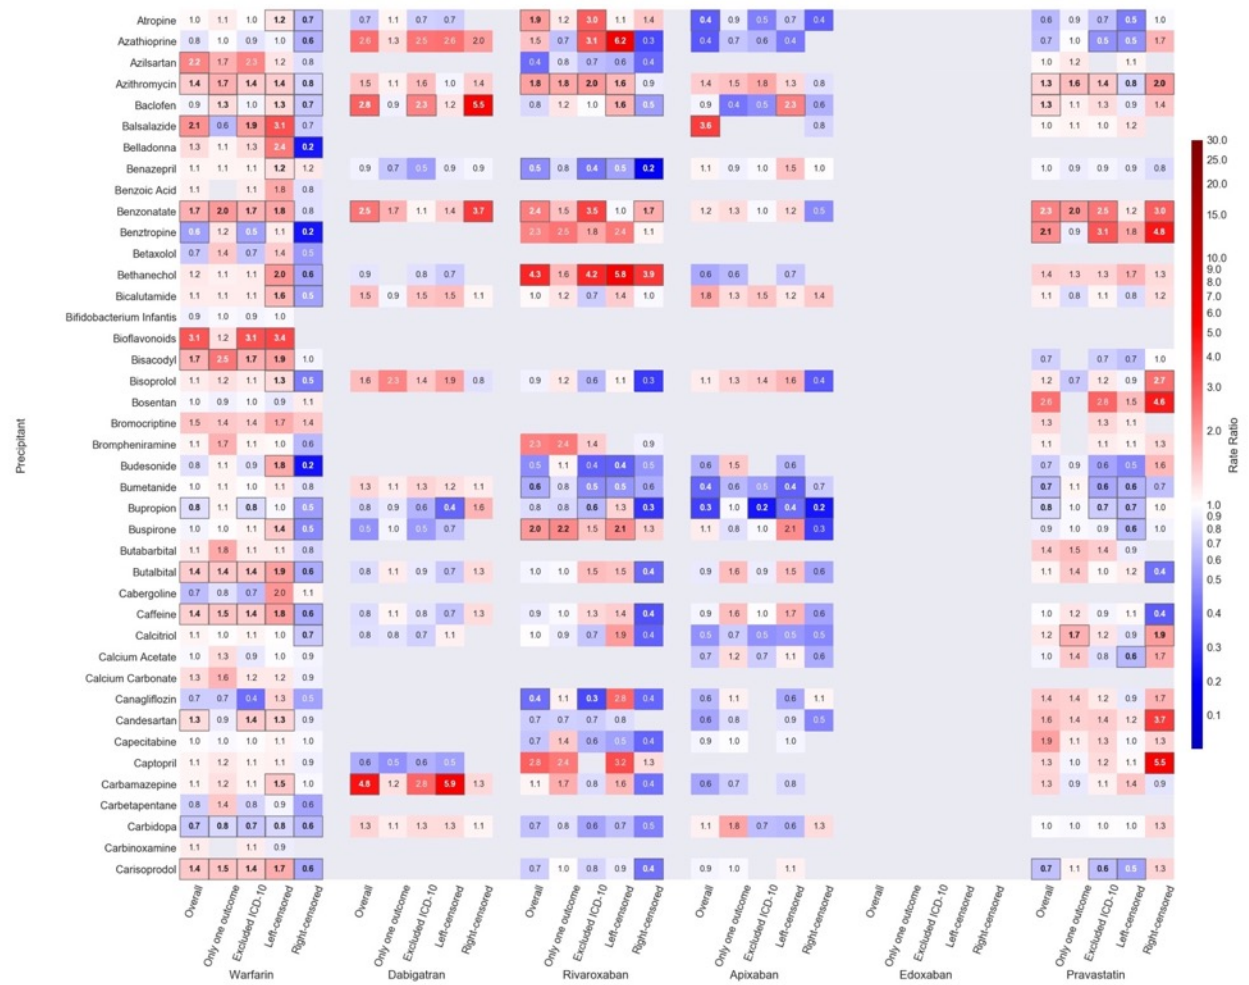

Precipitants are listed alphabetically. Rate ratios highlighted with bold text and a dark grey box are statistically significant ( $p < 0.05$ ). Panel B includes precipitants from atropine to carisoprodol.

Figure S5. Continued.

C

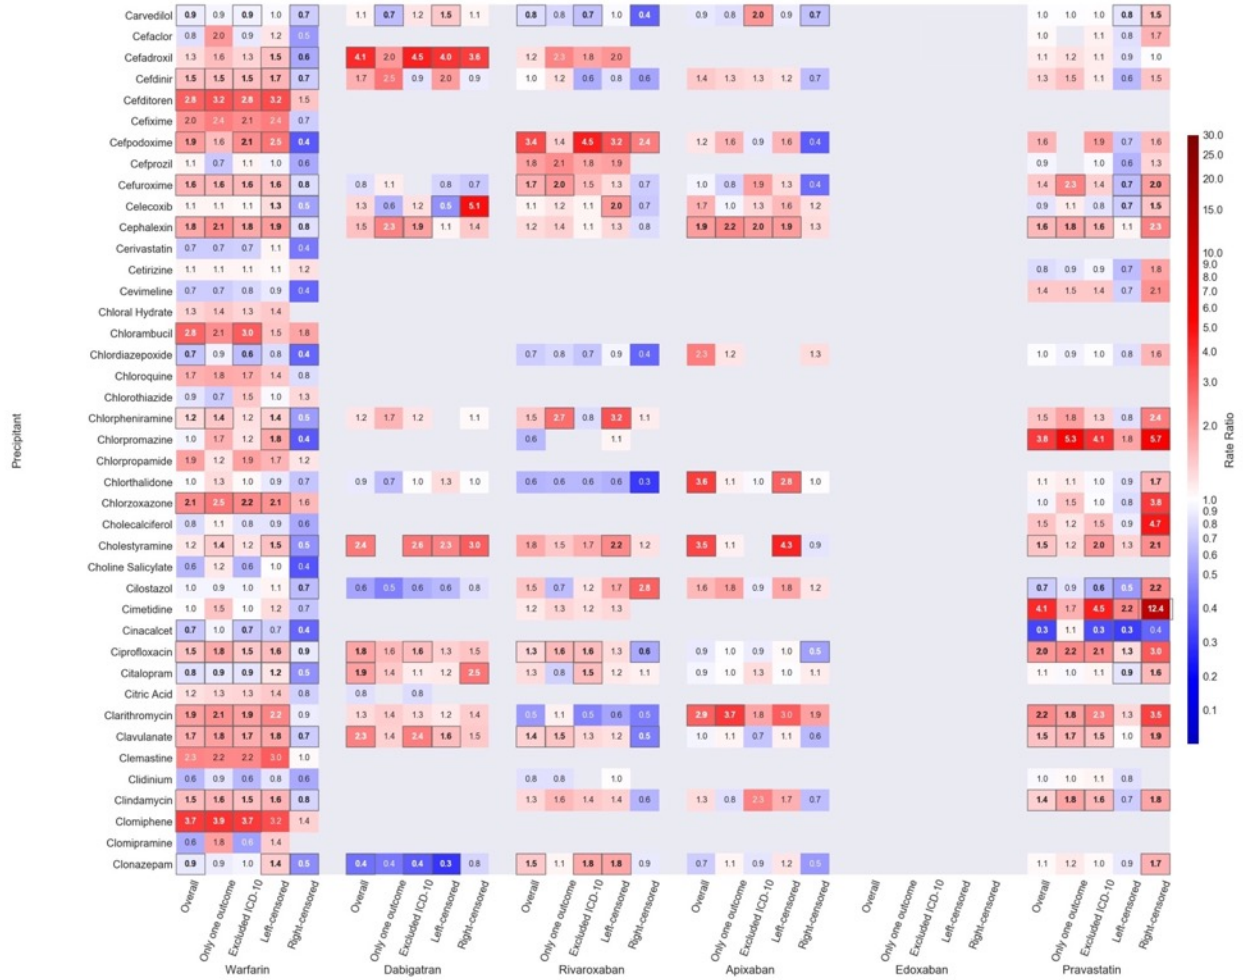

Precipitants are listed alphabetically. Rate ratios highlighted with bold text and a dark grey box are statistically significant (p < 0.05). Panel C includes precipitants from carvedilol to clonazepam.

Figure S5. Continued.

D

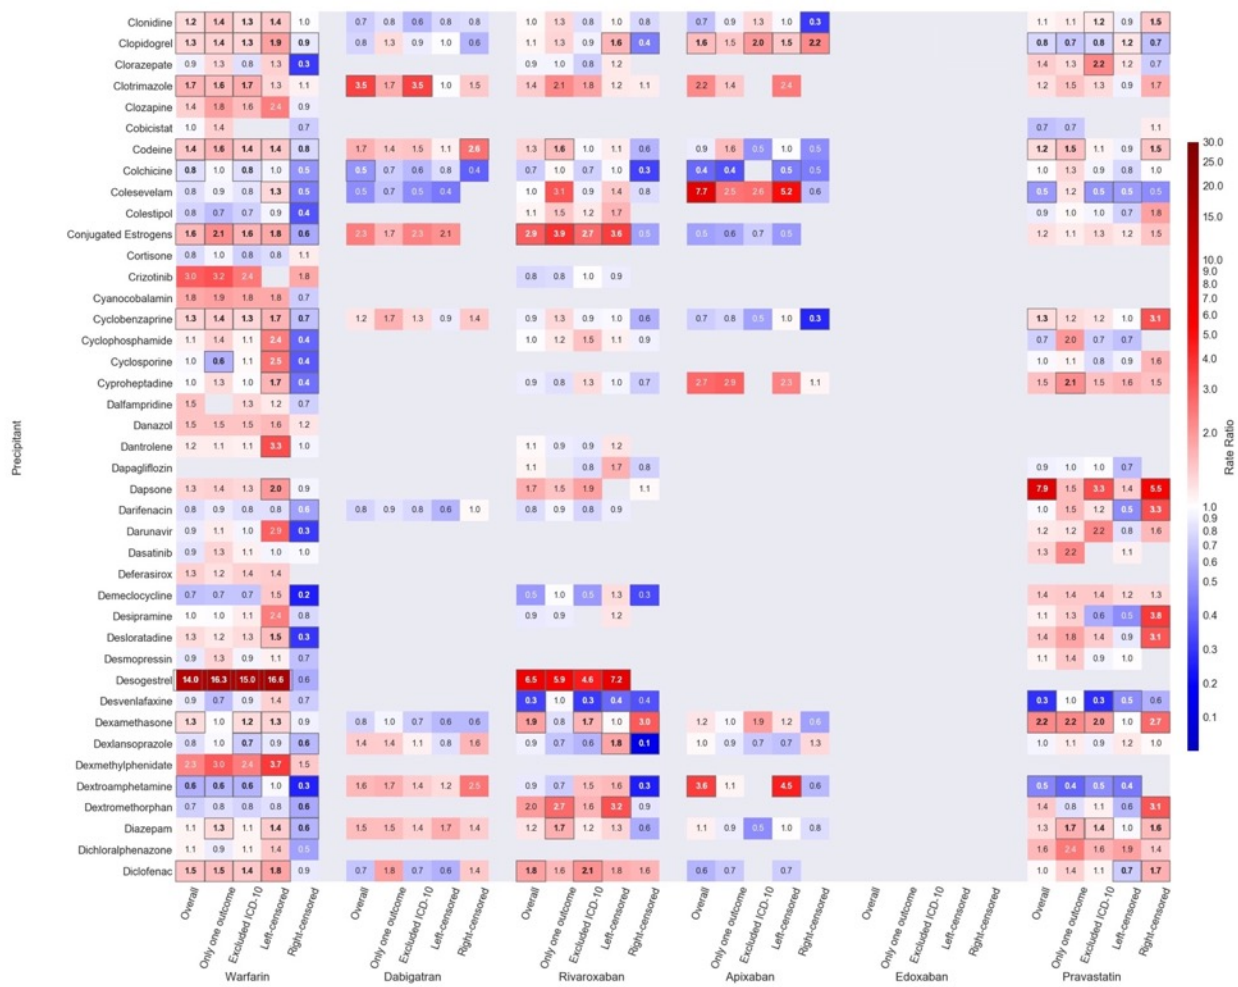

Precipitants are listed alphabetically. Rate ratios highlighted with bold text and a dark grey box are statistically significant ( $p < 0.05$ ). Panel D includes precipitants from clonidine to diclofenac.

Figure S5. Continued.

E

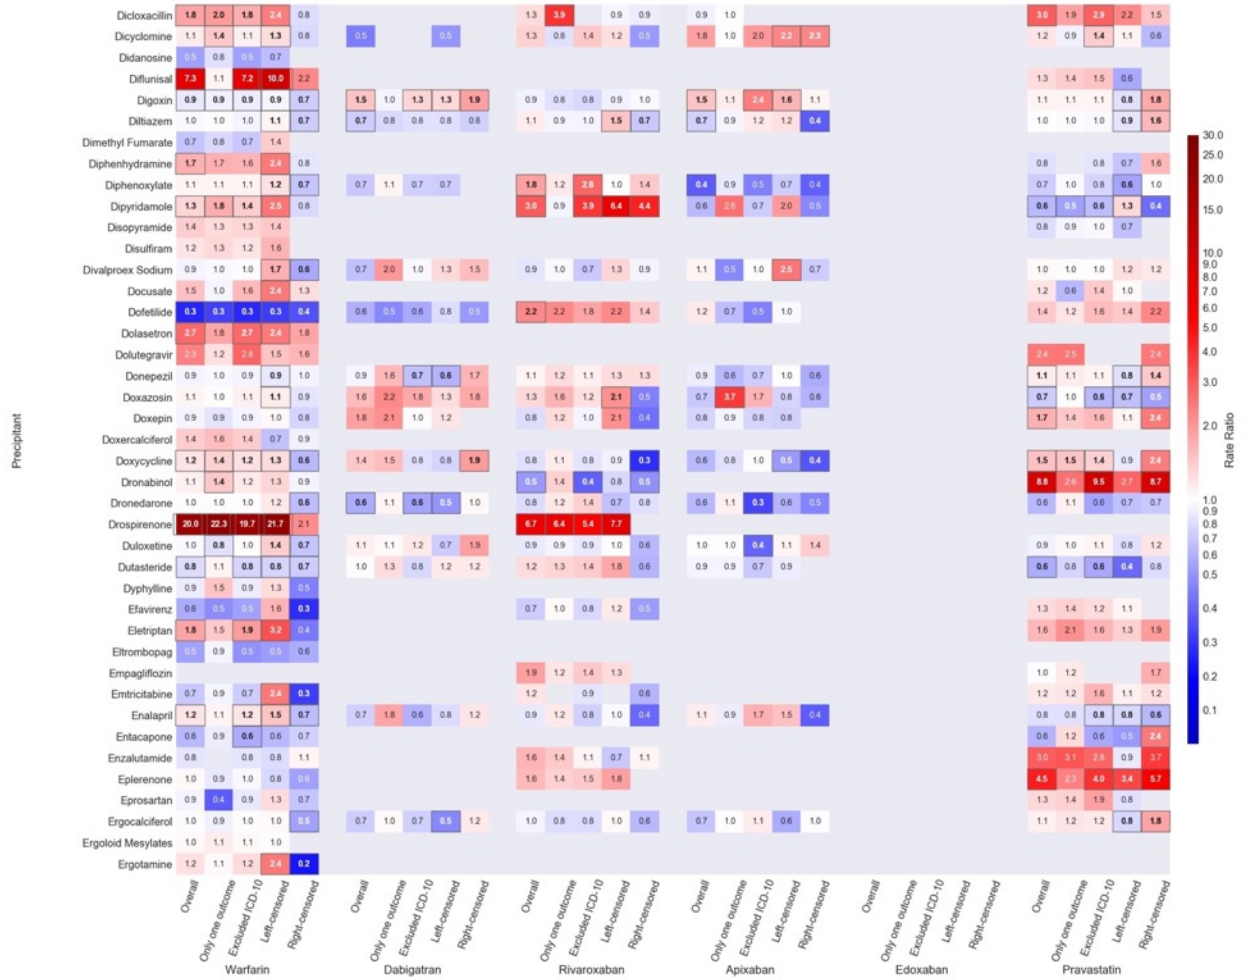

Precipitants are listed alphabetically. Rate ratios highlighted with bold text and a dark grey box are statistically significant ( $p < 0.05$ ). Panel E includes precipitants from dicloxacillin to ergotamine.

Figure S5. Continued.

F

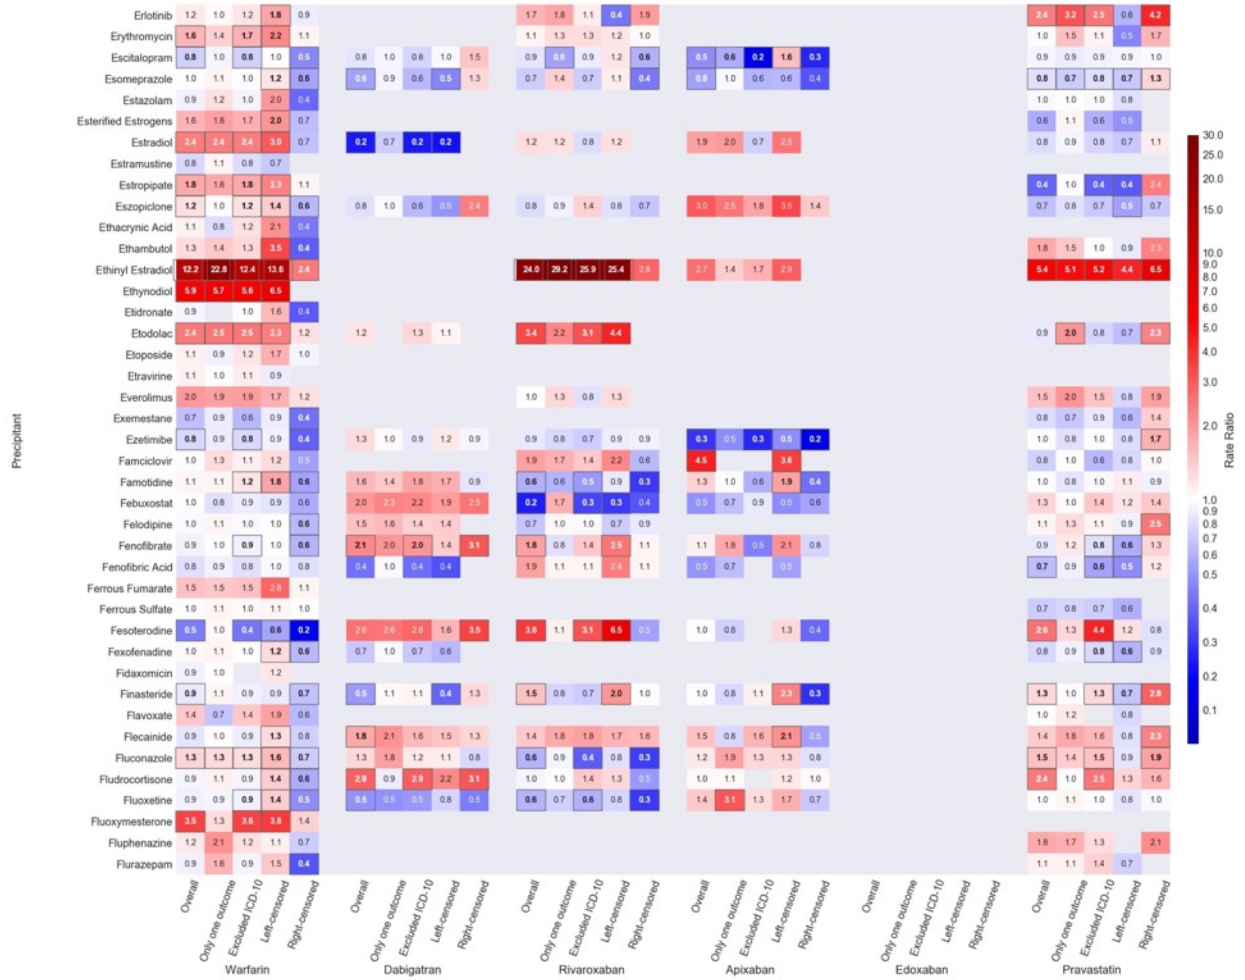

Precipitants are listed alphabetically. Rate ratios highlighted with bold text and a dark grey box are statistically significant (p < 0.05). Panel F includes precipitants from erlotinib to flurazepam.

Figure S5. Continued.

G

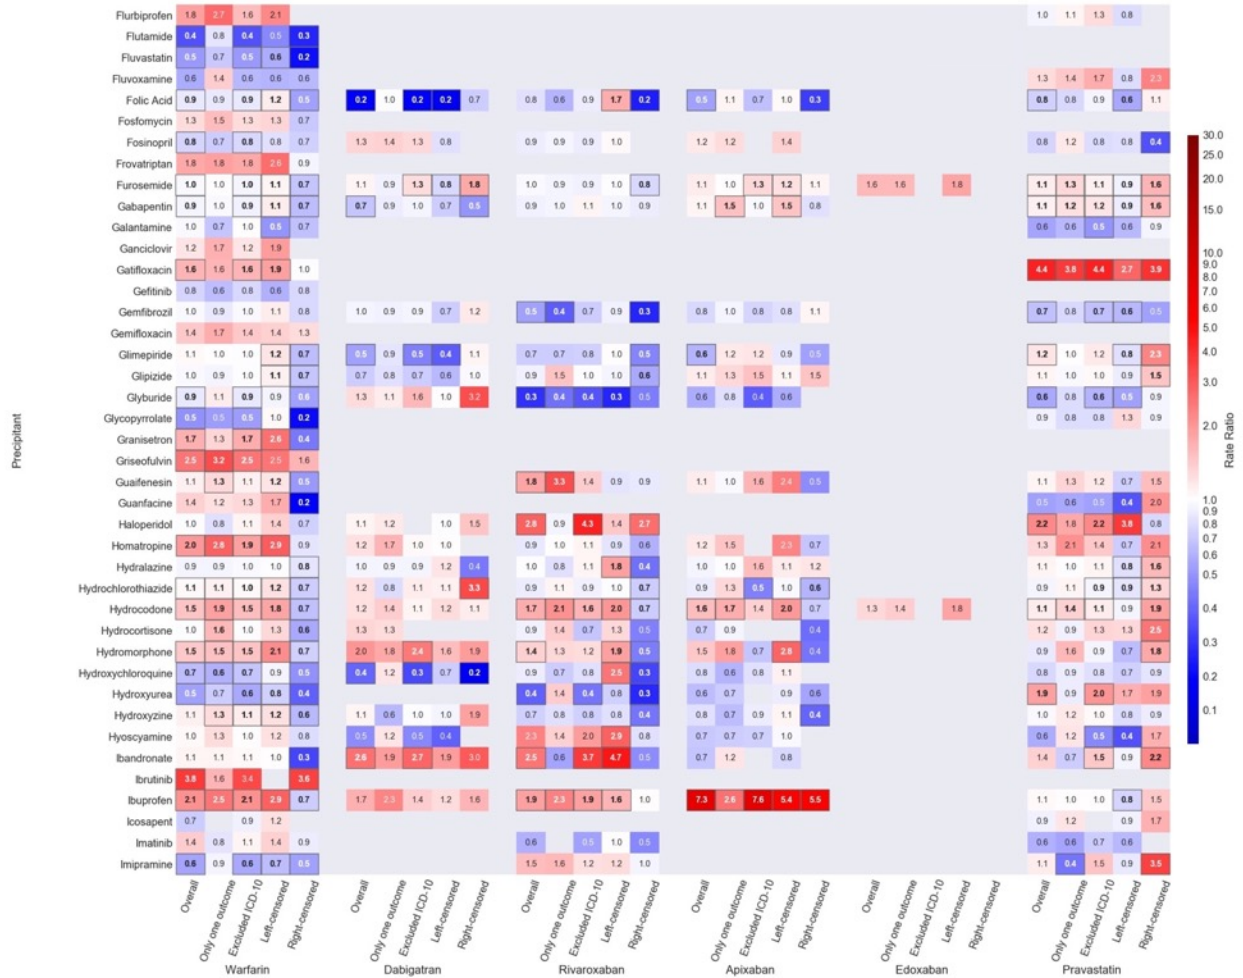

Precipitants are listed alphabetically. Rate ratios highlighted with bold text and a dark grey box are statistically significant (p < 0.05). Panel G includes precipitants from flurbiprofen to imipramine.

Figure S5. Continued.

H

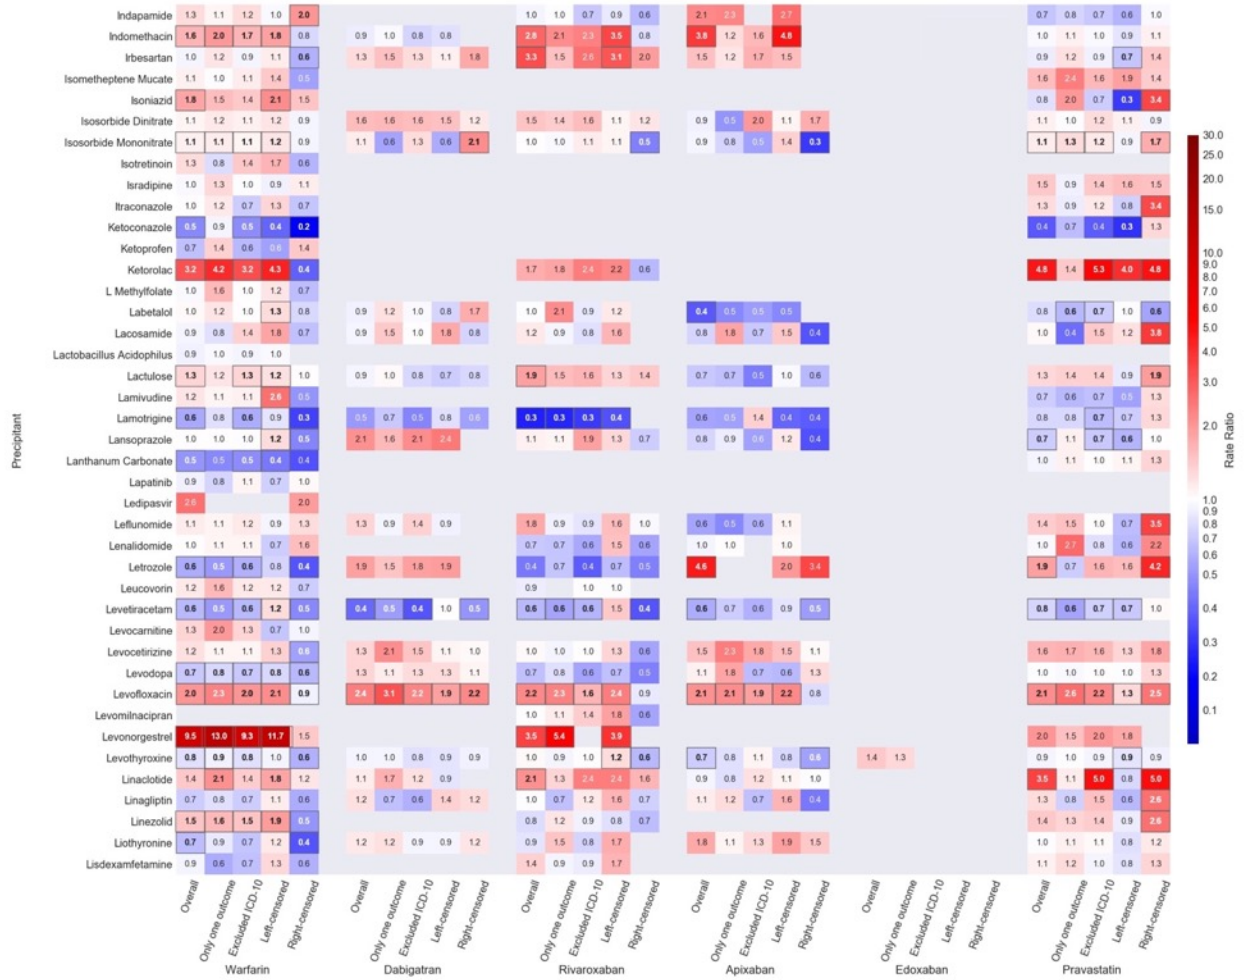

Precipitants are listed alphabetically. Rate ratios highlighted with bold text and a dark grey box are statistically significant (p < 0.05). Panel H includes precipitants from indapamide to lisdexamfetamine.



Figure S5. Continued.

I

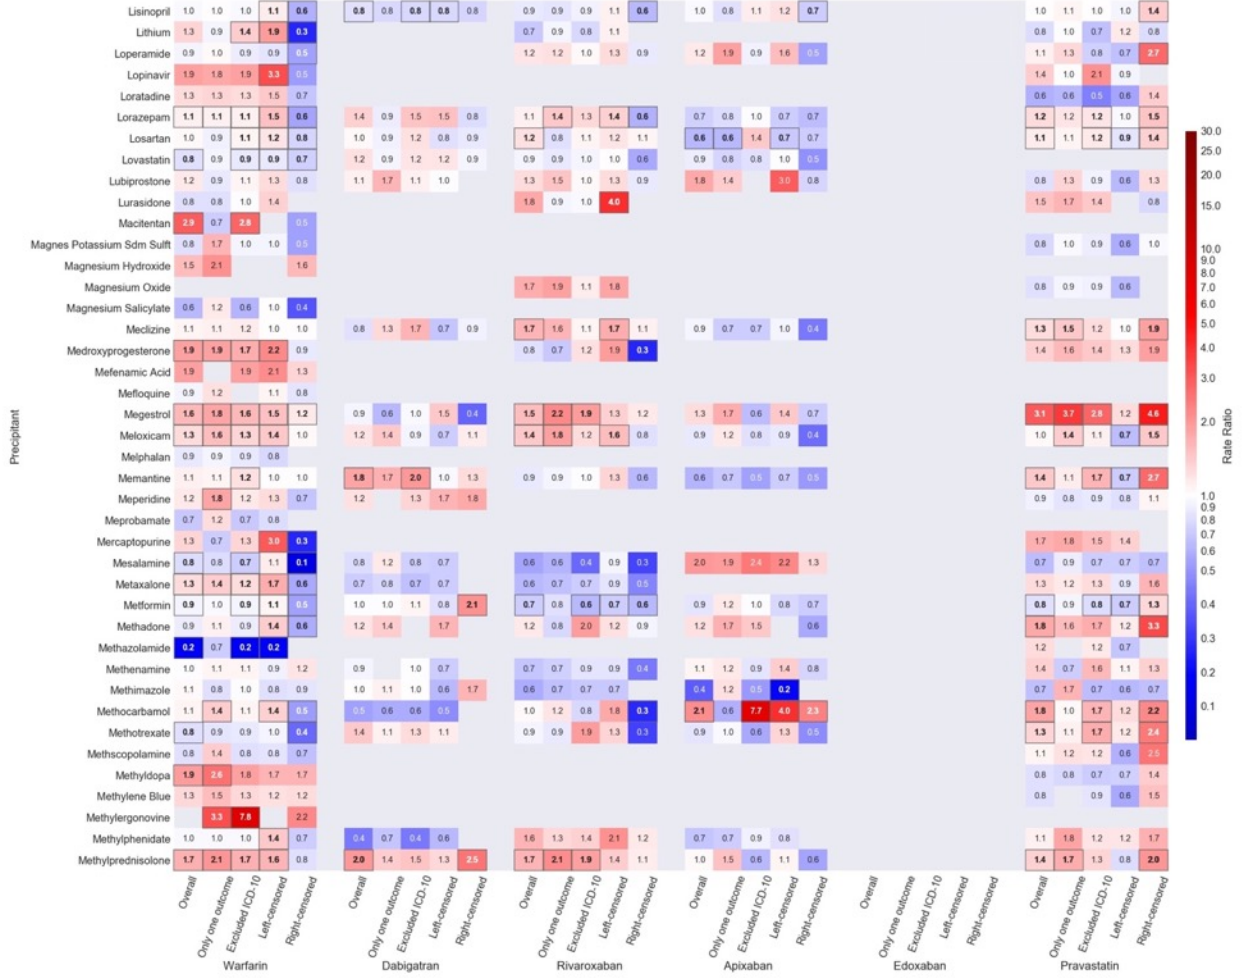

Precipitants are listed alphabetically. Rate ratios highlighted with bold text and a dark grey box are statistically significant (p < 0.05). Panel I includes precipitants from lisinopril to methylprednisolone.

Figure S5. Continued.

J

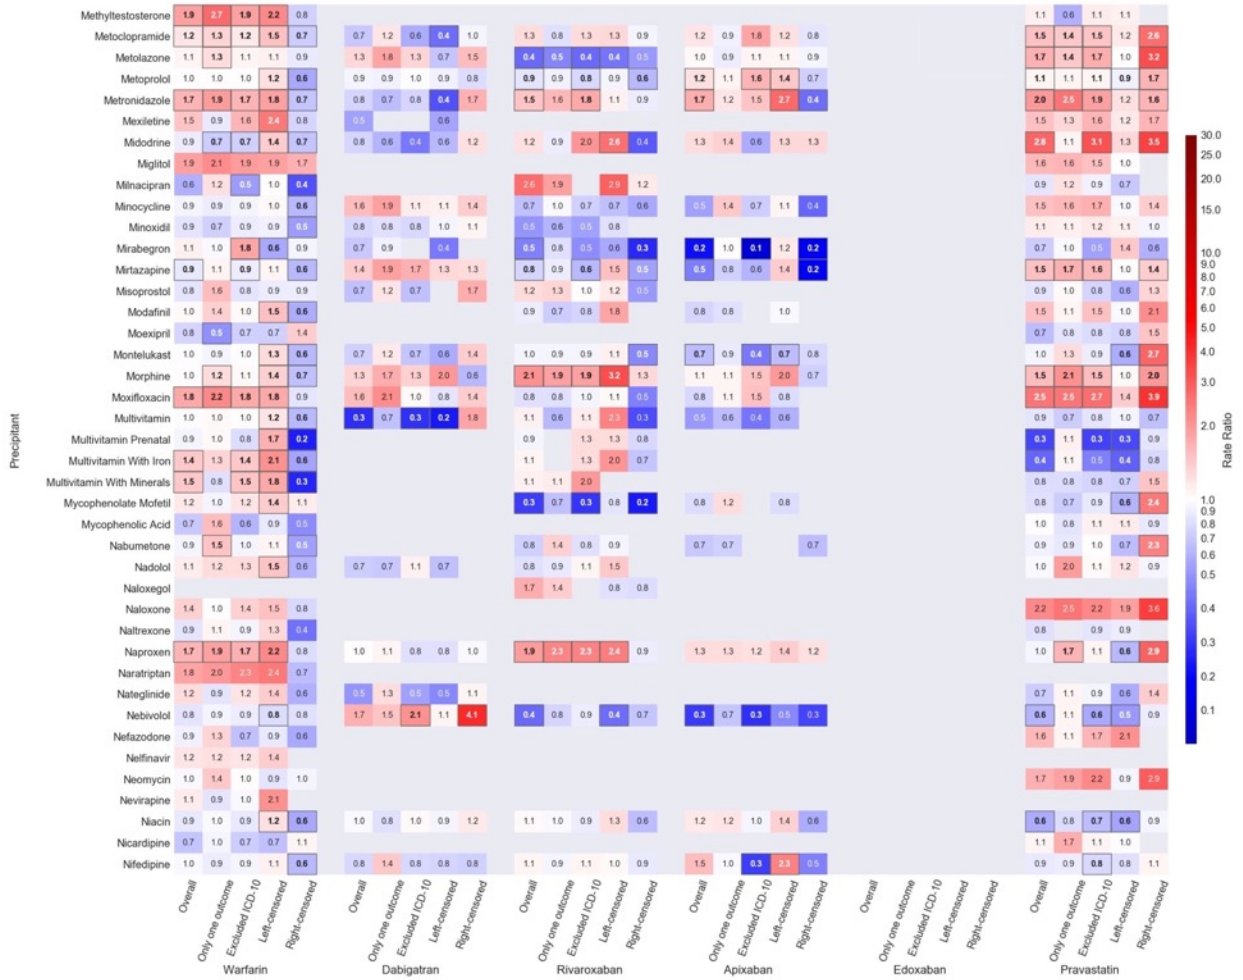

Precipitants are listed alphabetically. Rate ratios highlighted with bold text and a dark grey box are statistically significant (p<0.05). Panel J includes precipitants from methyltestosterone to nifedipine.

Figure S5. Continued.

K

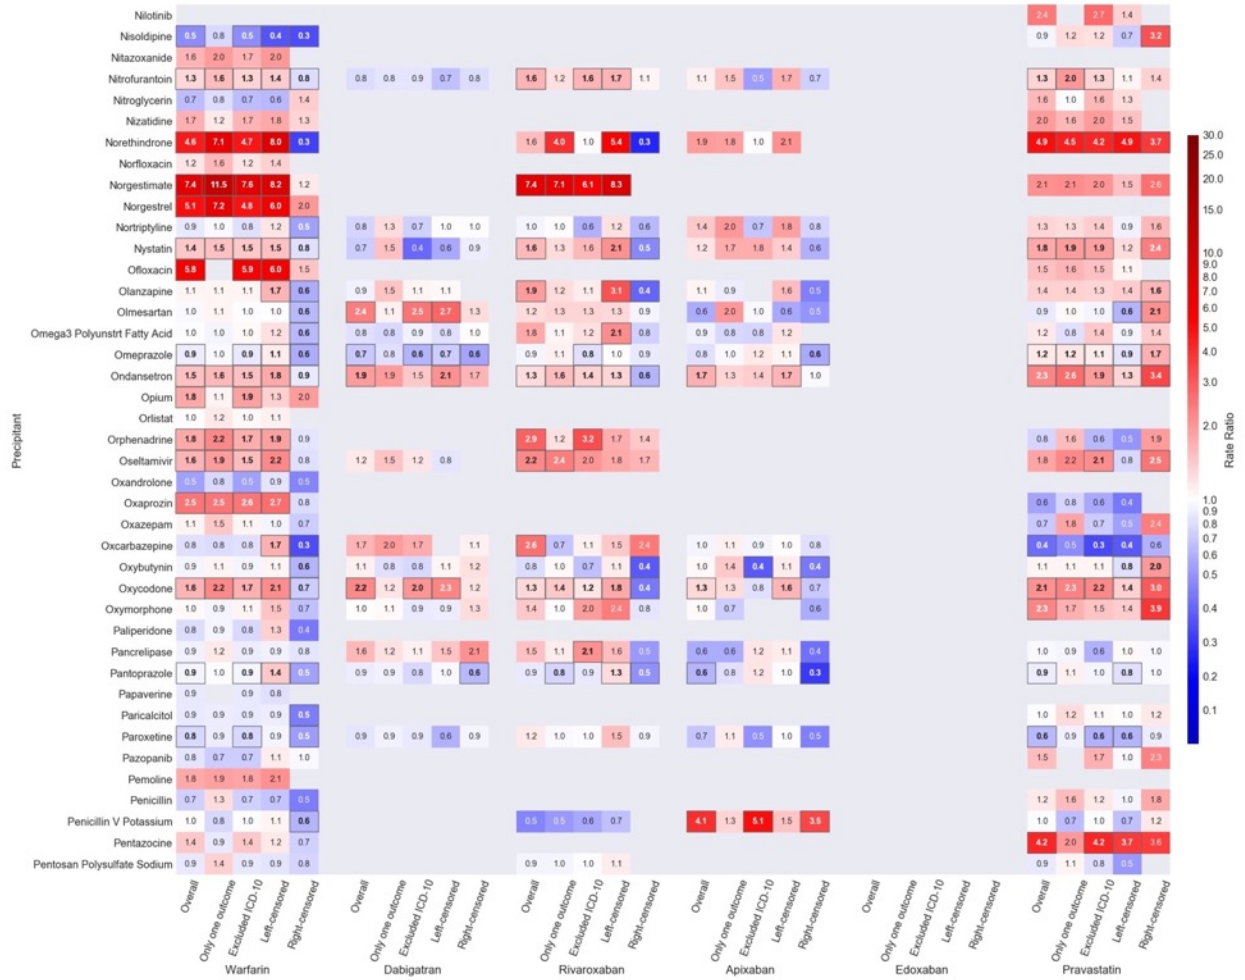

Precipitants are listed alphabetically. Rate ratios highlighted with bold text and a dark grey box are statistically significant (p < 0.05). Panel K includes precipitants from nilotinib to pentosane polysulfate sodium.

Figure S5. Continued.

L

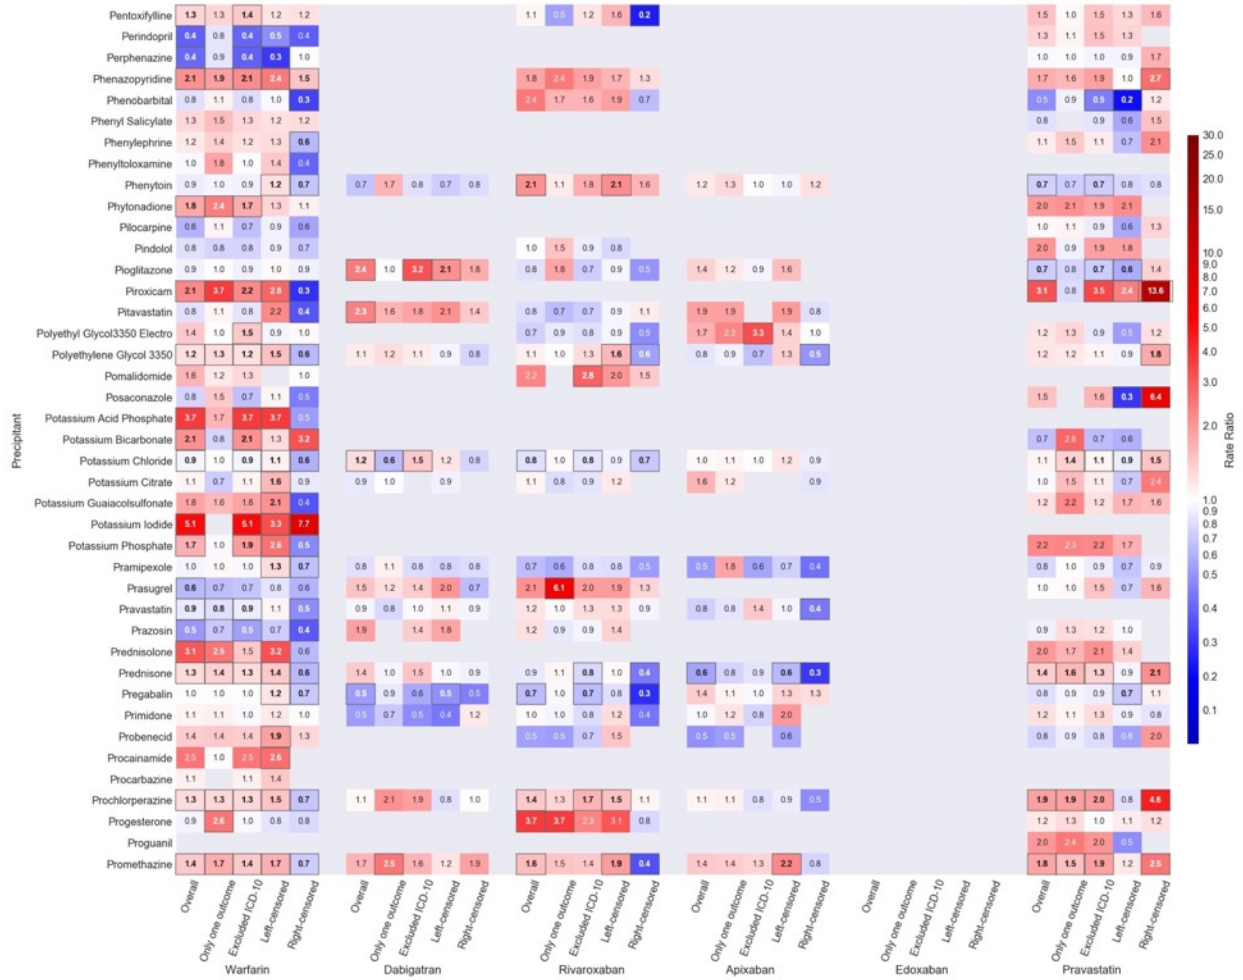

Precipitants are listed alphabetically. Rate ratios highlighted with bold text and a dark grey box are statistically significant ( $p < 0.05$ ). Panel L includes precipitants from pentoxifylline to promethazine.

Figure S5. Continued.

M

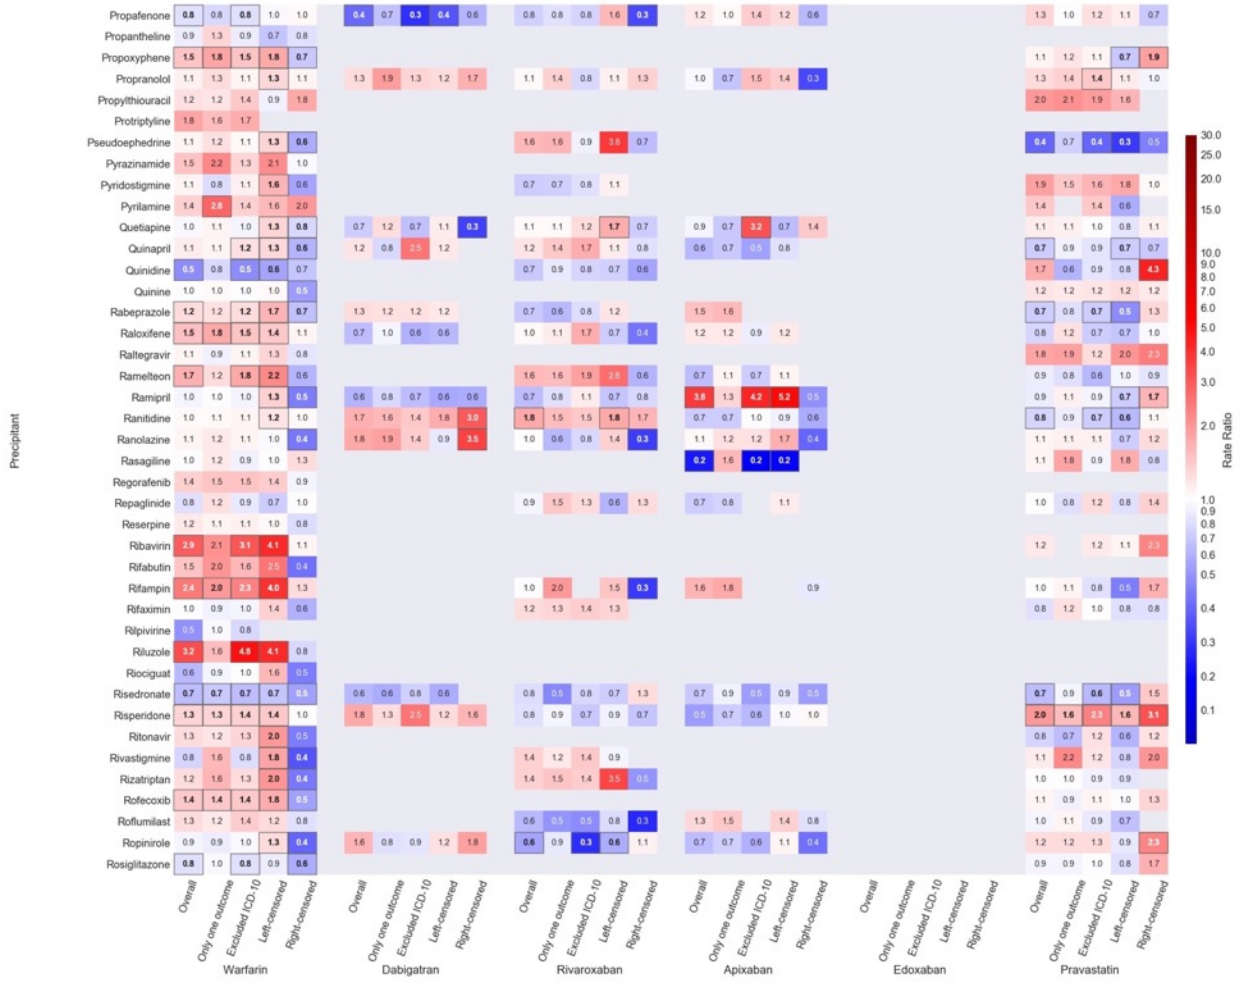

Precipitants are listed alphabetically. Rate ratios highlighted with bold text and a dark grey box are statistically significant ( $p < 0.05$ ). Panel M includes precipitants from propafenone to rosiglitazone.

Figure S5. Continued.

N

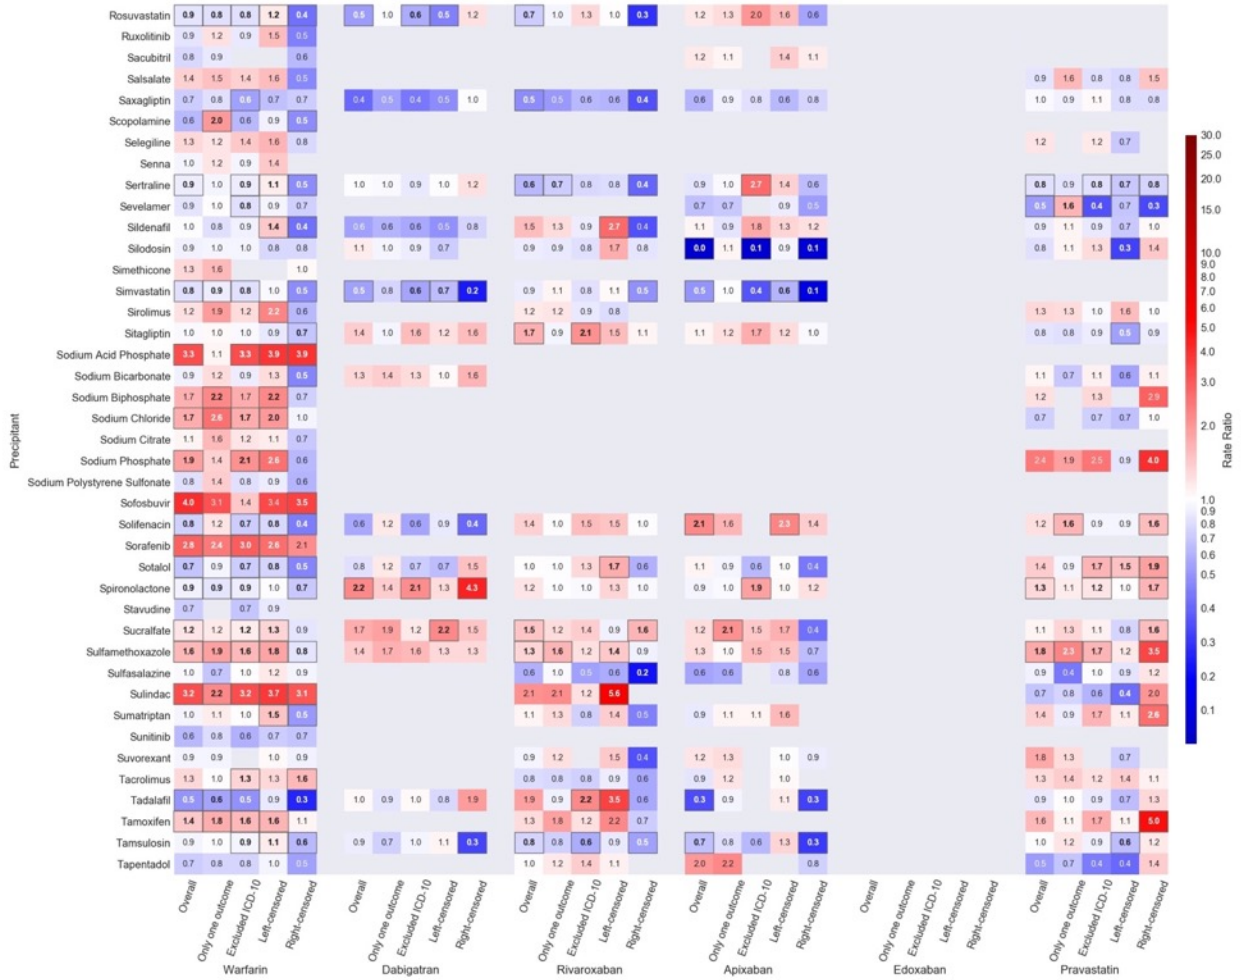

Precipitants are listed alphabetically. Rate ratios highlighted with bold text and a dark grey box are statistically significant (p<0.05). Panel N includes precipitants from rosuvastatin to tapentadol.

Figure S5. Continued.

O

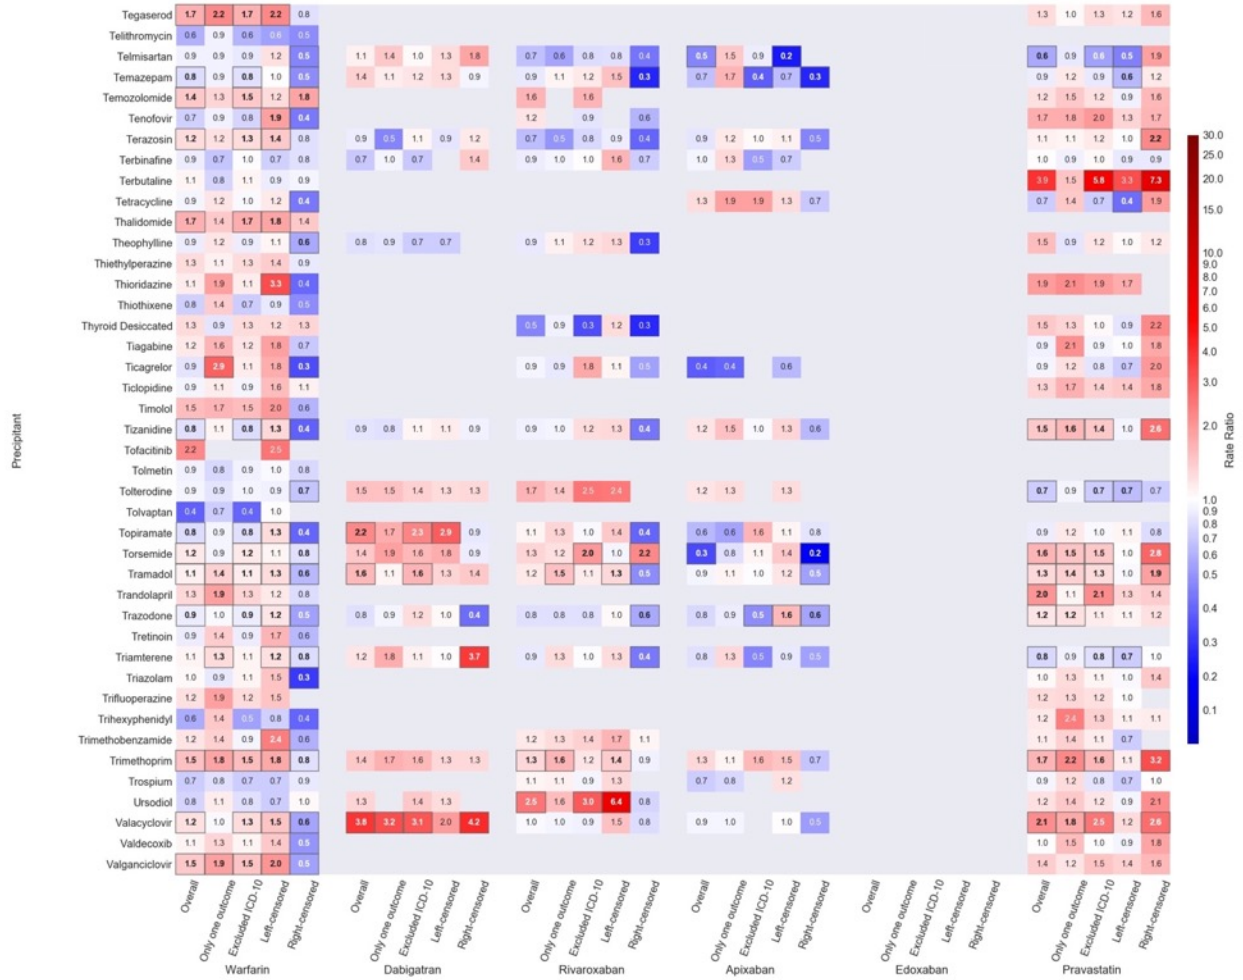

Precipitants are listed alphabetically. Rate ratios highlighted with bold text and a dark grey box are statistically significant (p < 0.05). Panel O includes precipitants from tegaserod to valganciclovir.

Figure S5. Continued.

P

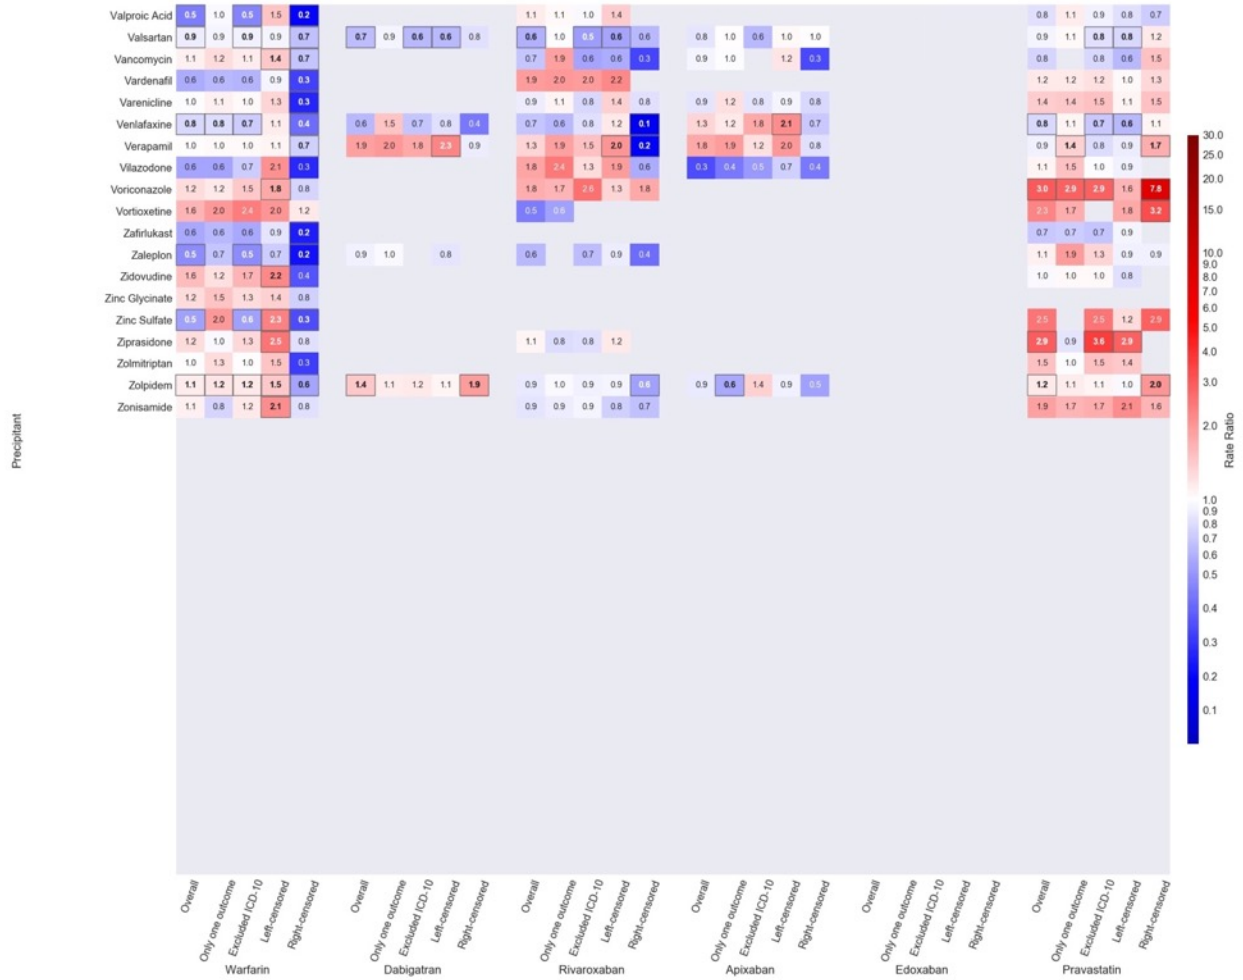

Precipitants are listed alphabetically. Rate ratios highlighted with bold text and a dark grey box are statistically significant ( $p < 0.05$ ). Panel P includes precipitants from valproic acid to zonisamide.



**Figure S6.** Heatmaps presenting the overall ratio of rate ratio comparing precipitant exposed time vs. precipitant unexposed time from the sensitivity analyses.

A

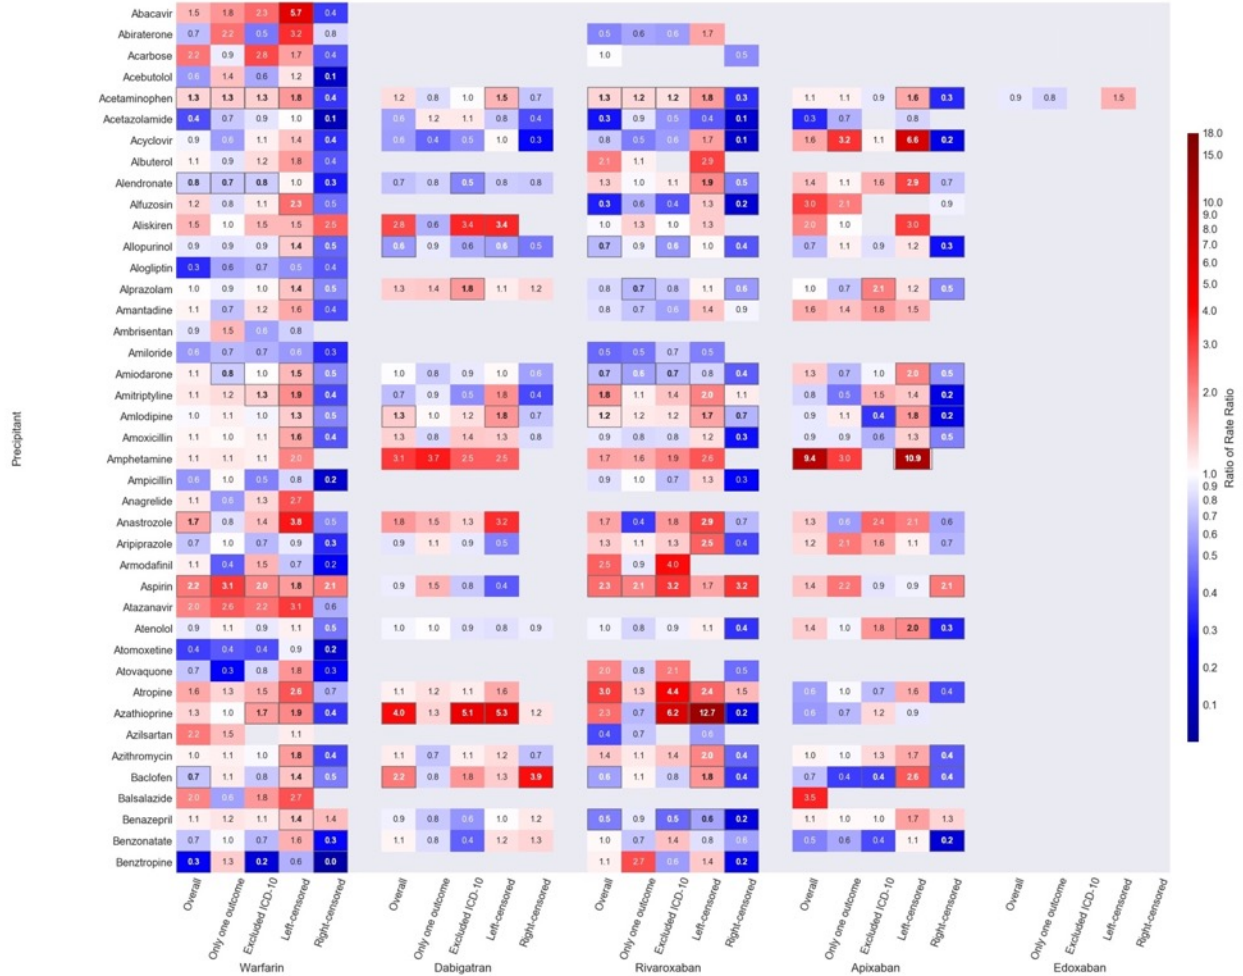

Precipitants are listed alphabetically. Ratio of rate ratios highlighted with bold text and a dark grey box are statistically significant ( $p < 0.05$ ). Panel A includes precipitants from abacavir to benzepiril.

Figure S6. Continued.

B

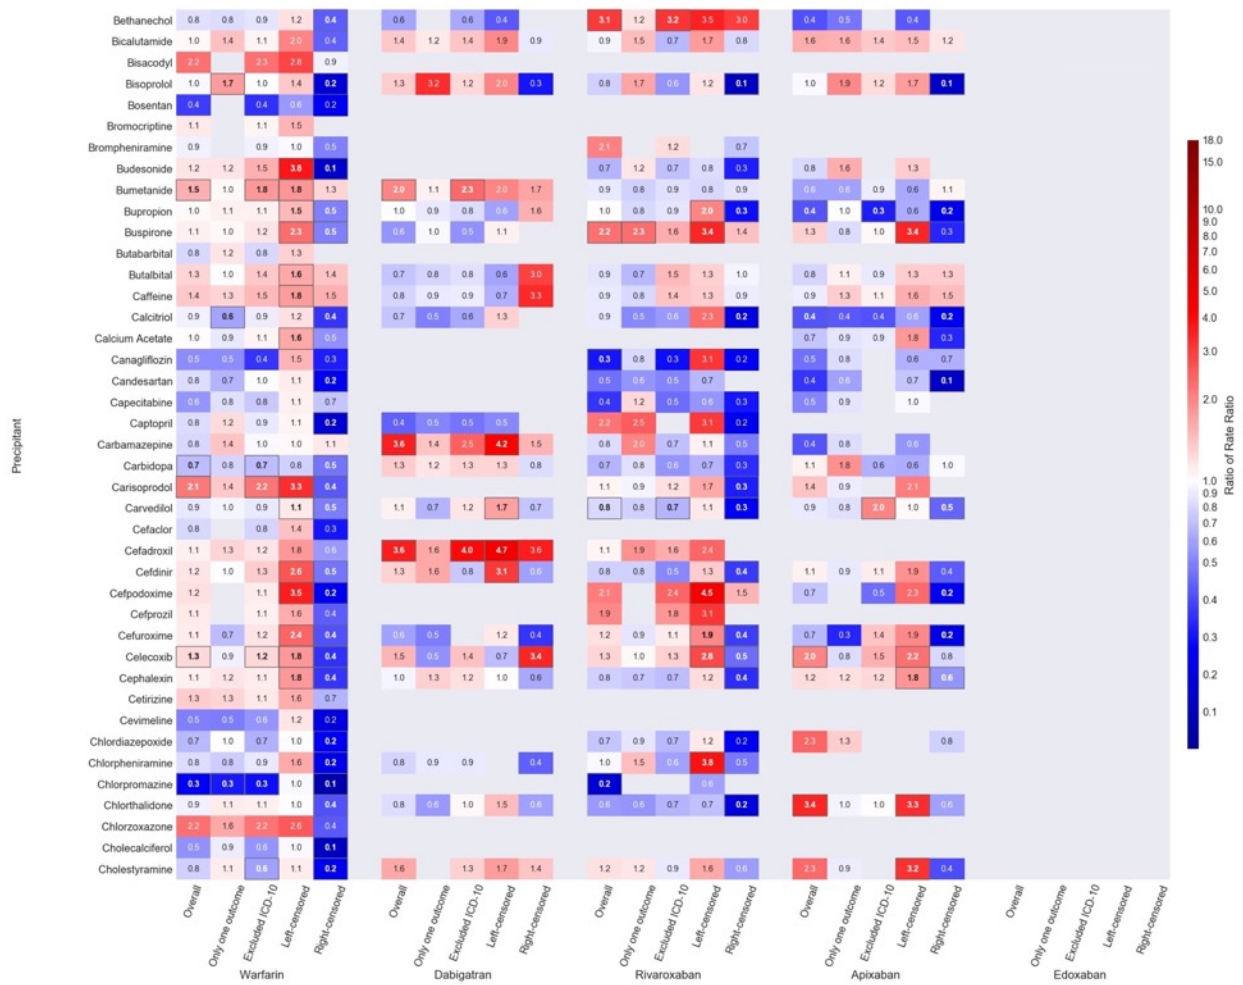

Precipitants are listed alphabetically. Ratio of rate ratios highlighted with bold text and a dark grey box are statistically significant ( $p < 0.05$ ). Panel B includes precipitants from benzonate to chlorthalidone.

Figure S6. Continued.

C

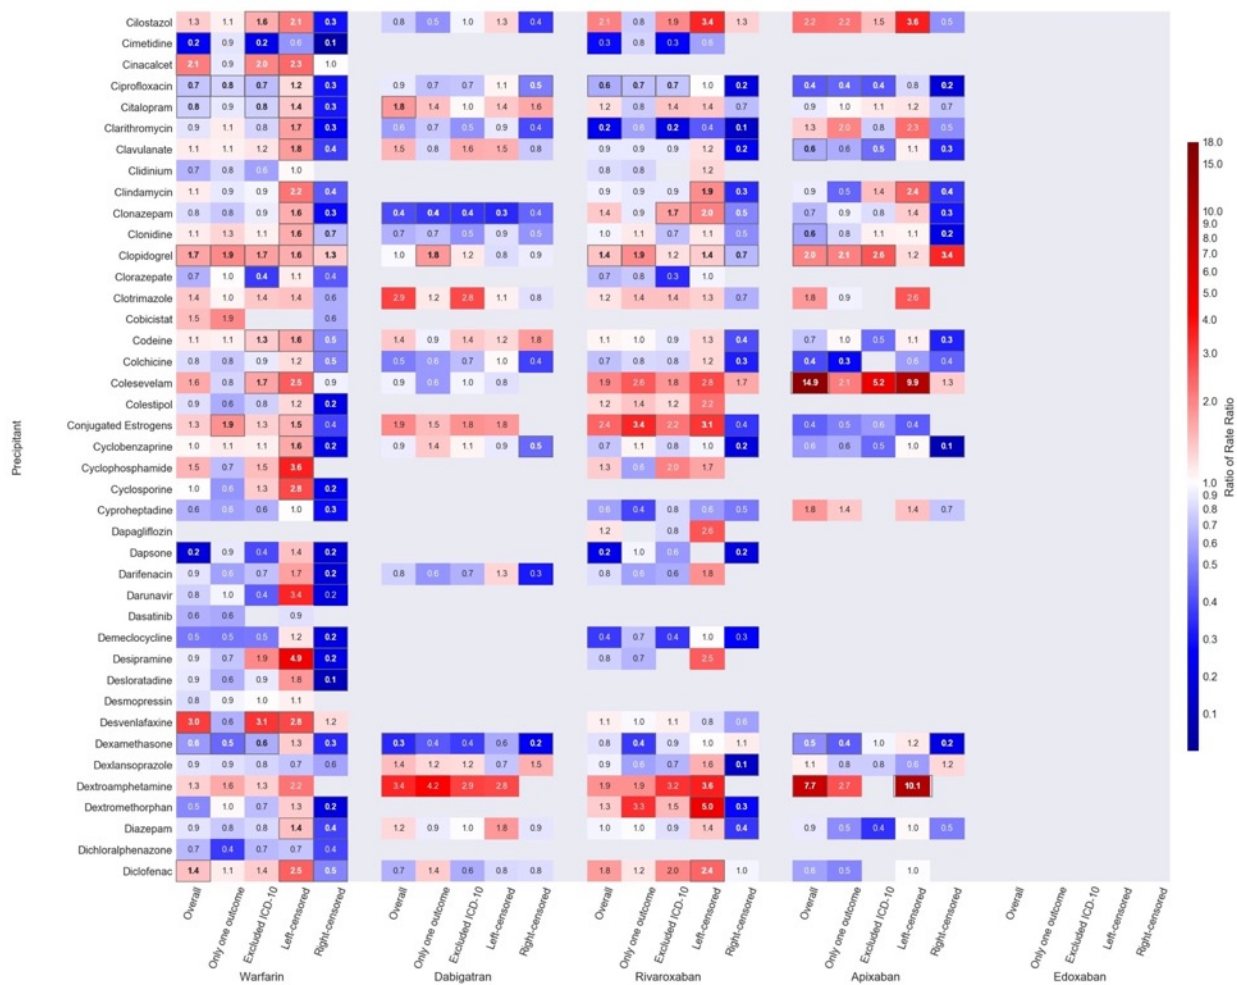

Precipitants are listed alphabetically. Ratio of rate ratios highlighted with bold text and a dark grey box are statistically significant (p < 0.05). Panel C includes precipitants from chlorzoxazone to diclofenac.

Figure S6. Continued.

D

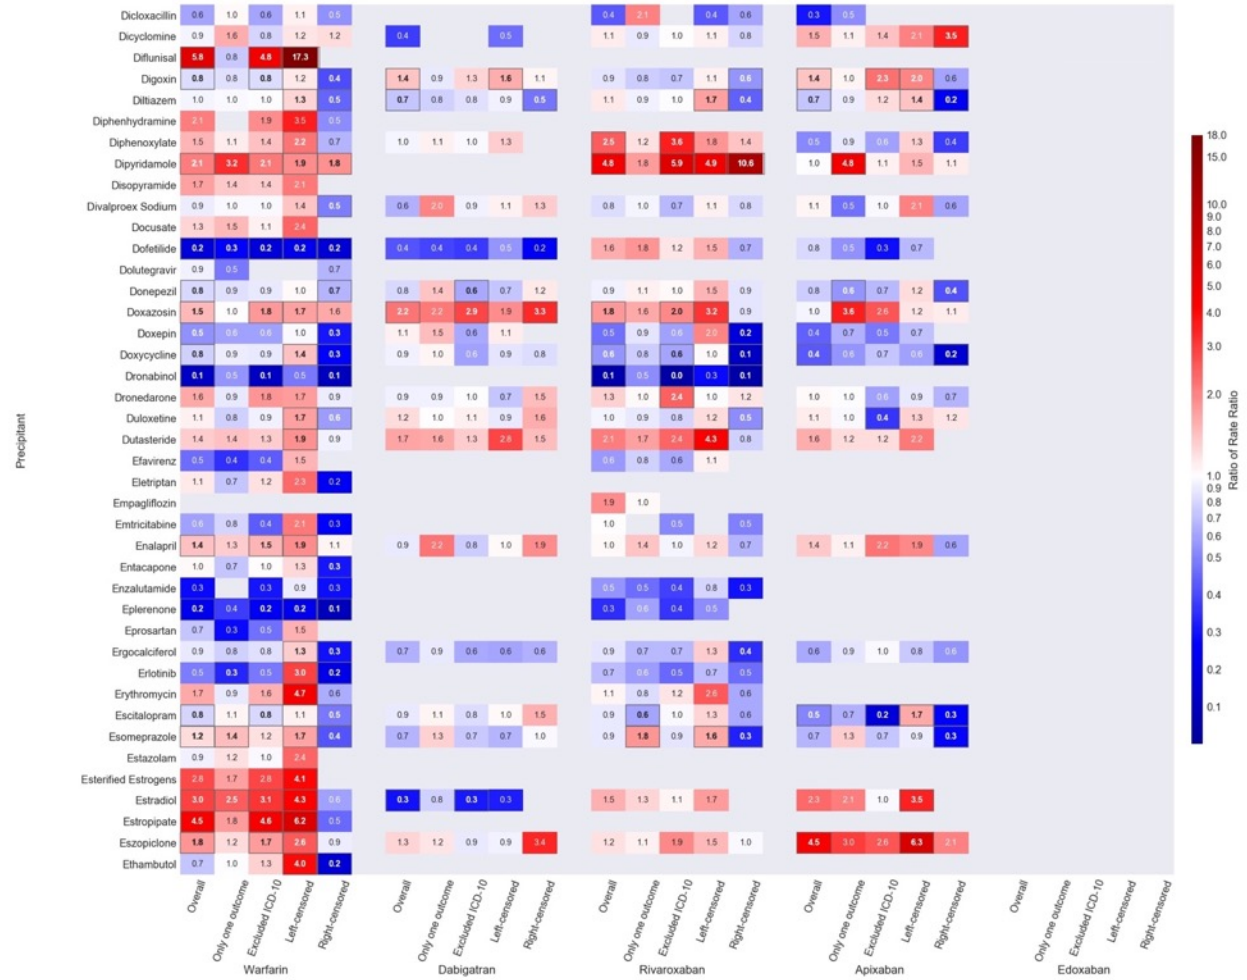

Precipitants are listed alphabetically. Ratio of rate ratios highlighted with bold text and a dark grey box are statistically significant (p < 0.05). Panel D includes precipitants from dicloxacillin to ethinyl estradiol.

Figure S6. Continued.

E

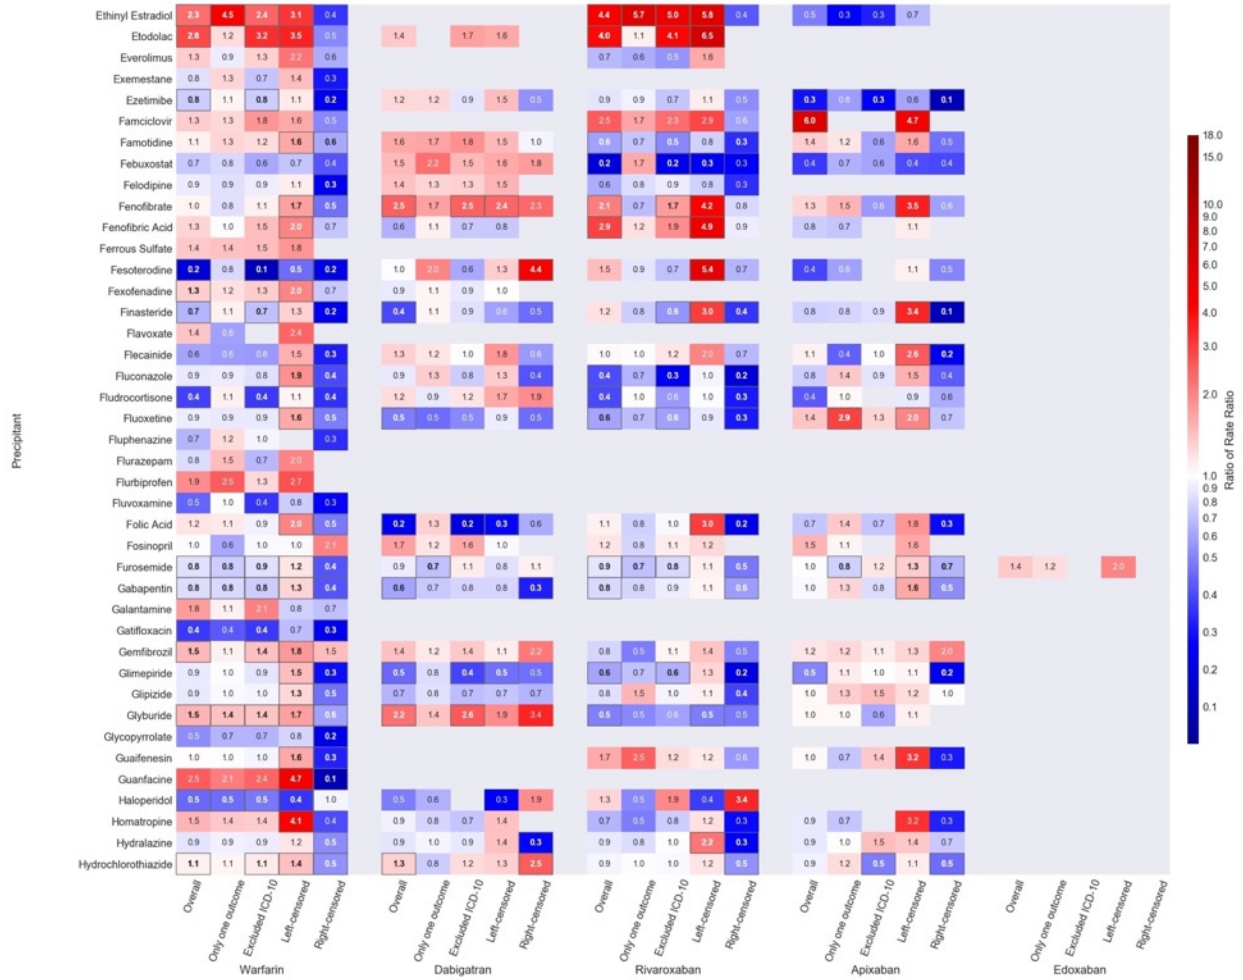

Precipitants are listed alphabetically. Ratio of rate ratios highlighted with bold text and a dark grey box are statistically significant (p < 0.05). Panel E includes precipitants from etodolac to hydroxychloroquine.

Figure S6. Continued.

F

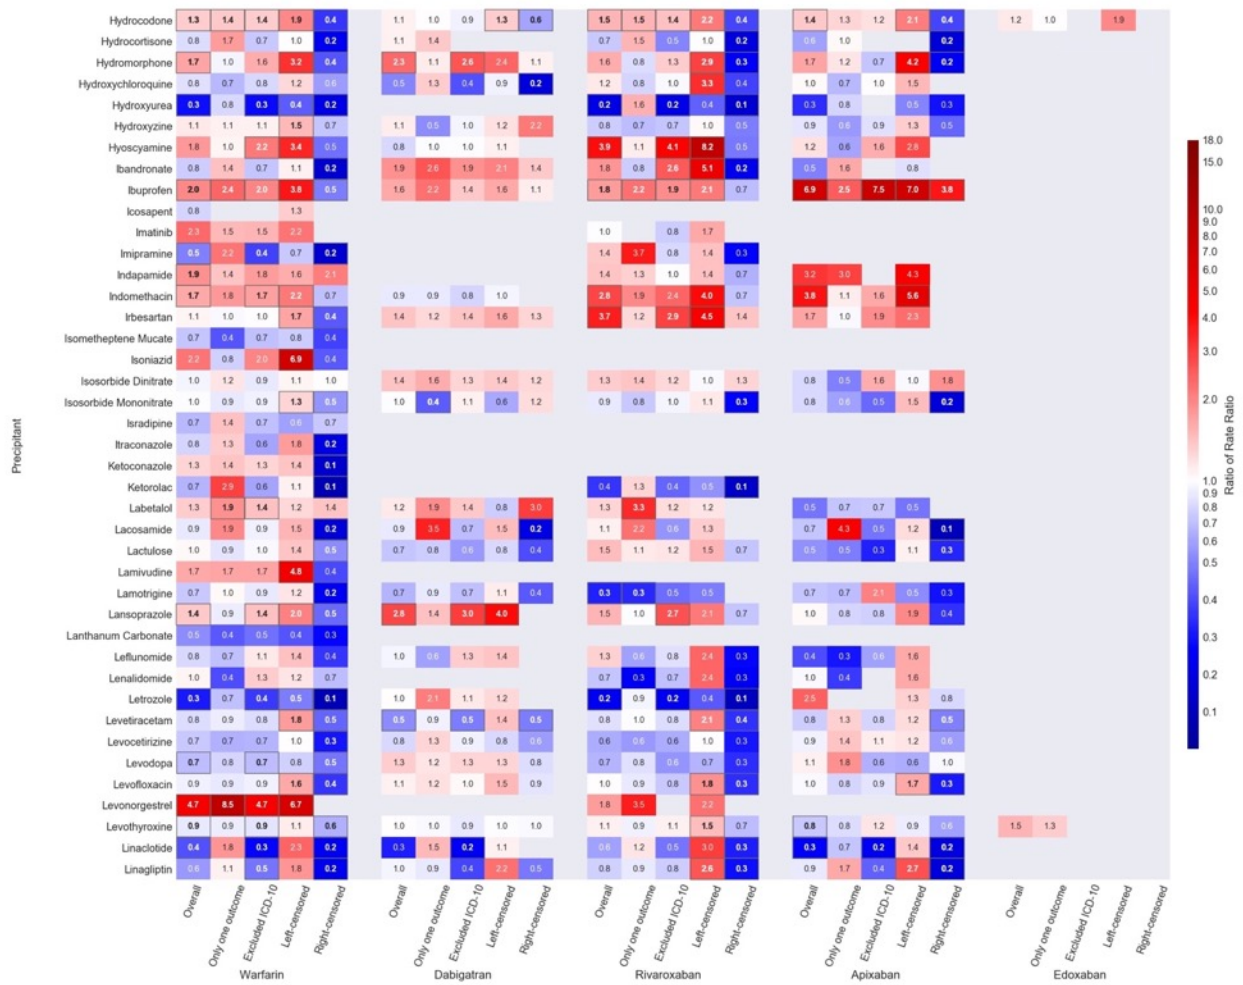

Precipitants are listed alphabetically. Ratio of rate ratios highlighted with bold text and a dark grey box are statistically significant (p < 0.05). Panel F includes precipitants from hydroxyurea to lisdexamfetamine.

Figure S6. Continued.

G

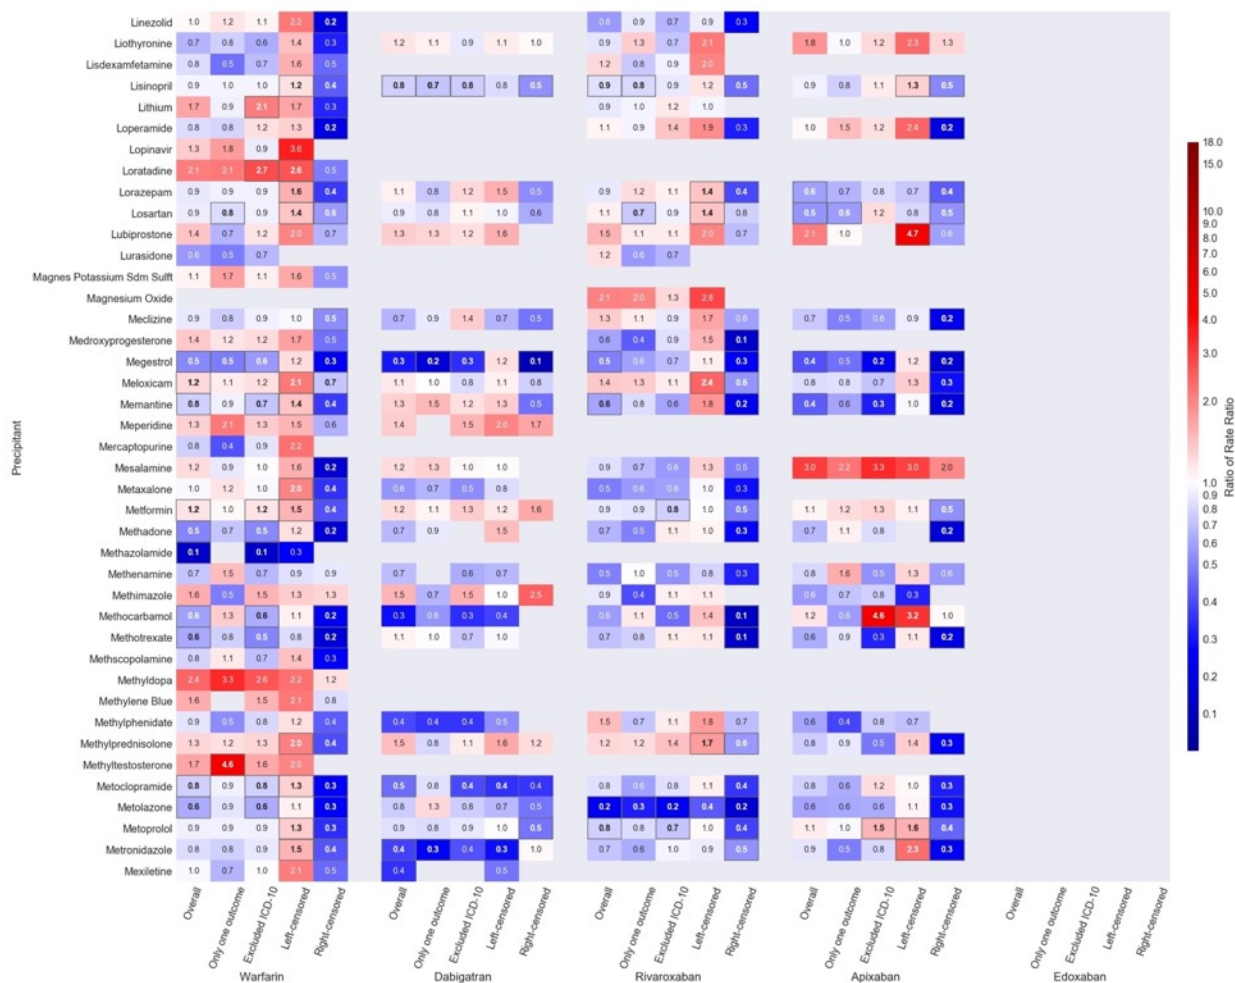

Precipitants are listed alphabetically. Ratio of rate ratios highlighted with bold text and a dark grey box are statistically significant ( $p < 0.05$ ). Panel G includes precipitants from lisinopril to minoxidil.

Figure S6. Continued.

H

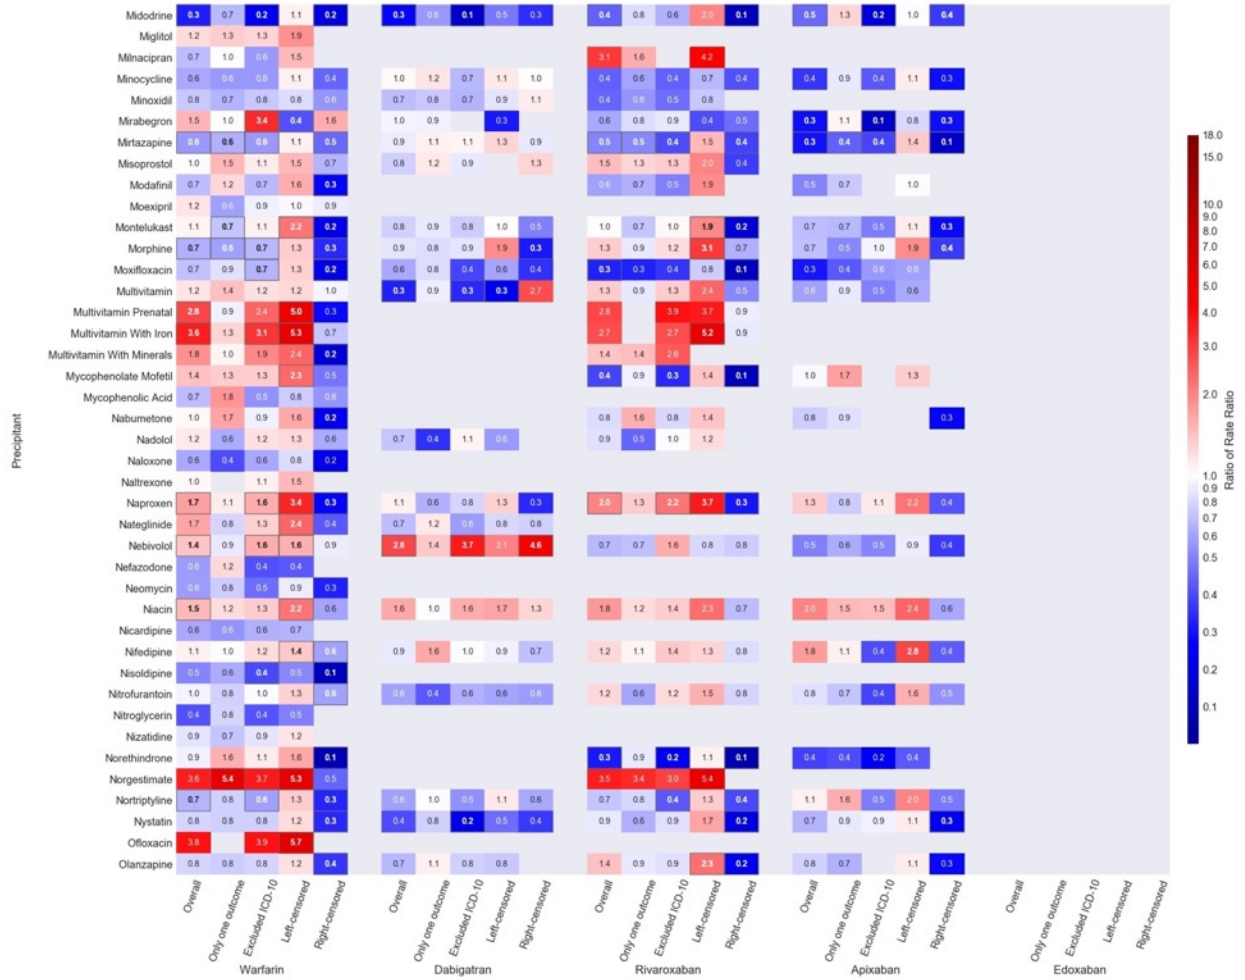

Precipitants are listed alphabetically. Ratio of rate ratios highlighted with bold text and a dark grey box are statistically significant ( $p < 0.05$ ). Panel H includes precipitants from mirabegron to oxaprozin.



Figure S6. Continued.

I

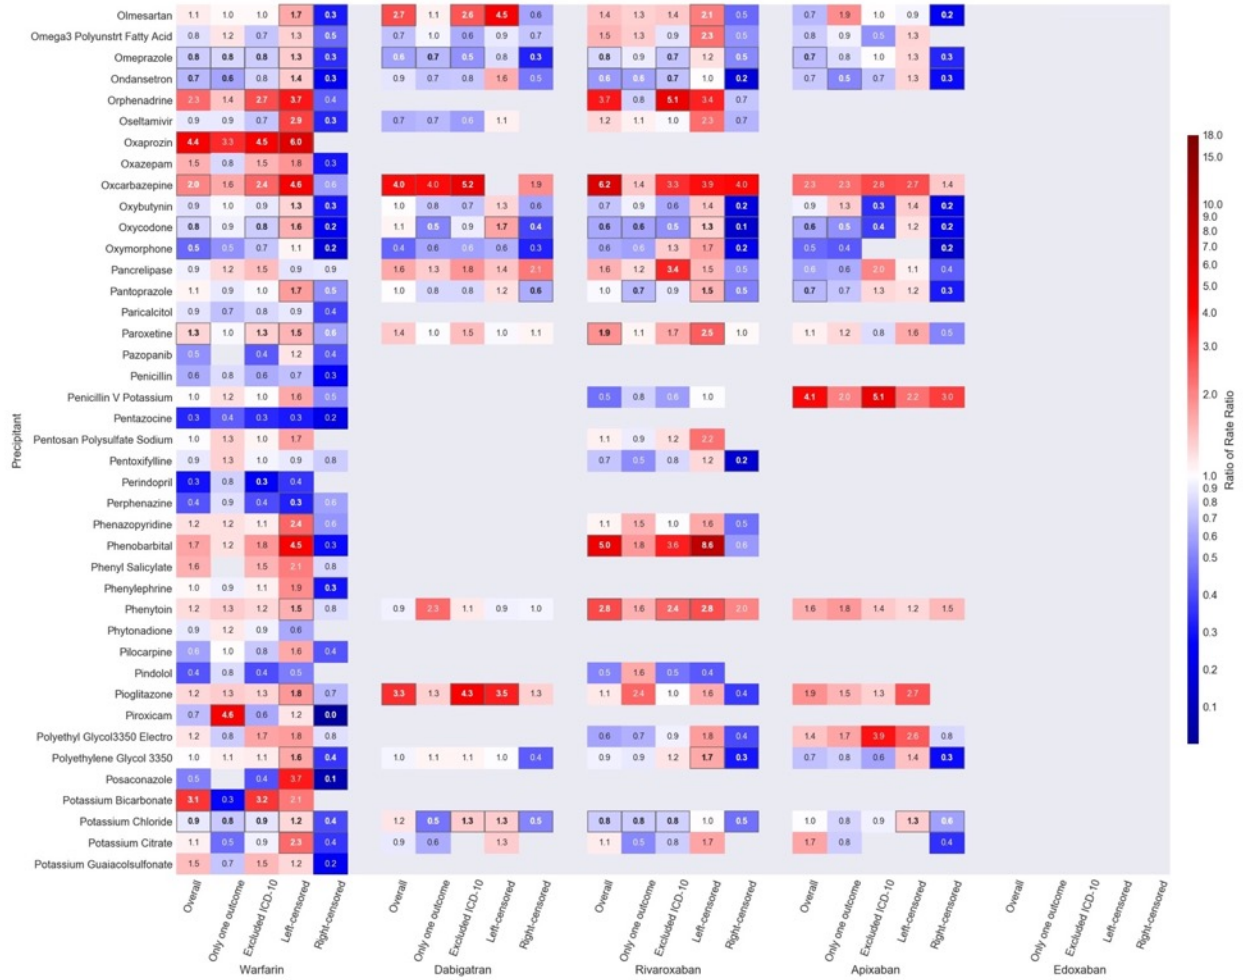

Precipitants are listed alphabetically. Ratio of rate ratios highlighted with bold text and a dark grey box are statistically significant (p < 0.05). Panel I includes precipitants from oxazepam to promethazine.

Figure S6. Continued.

J

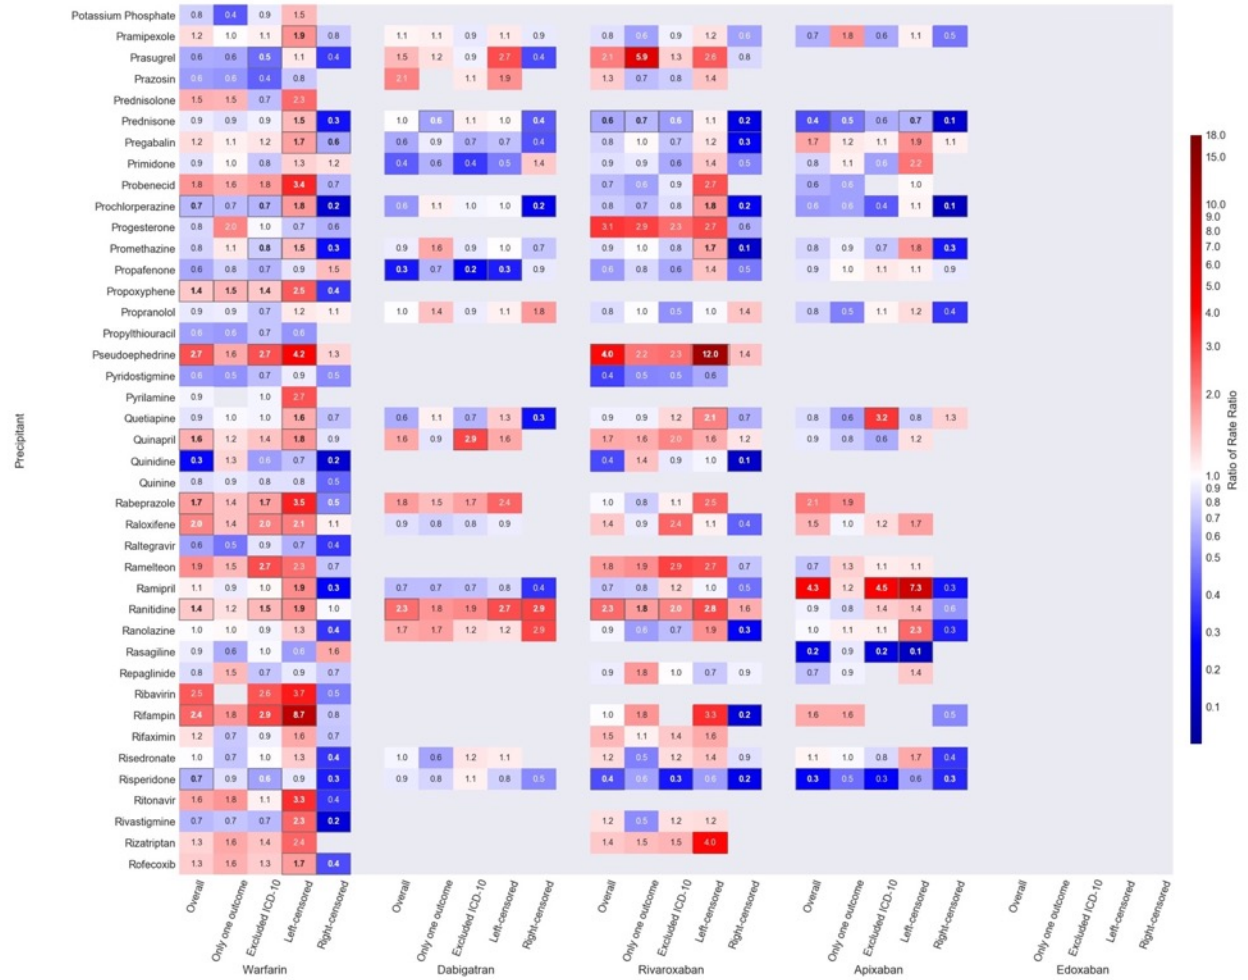

Precipitants are listed alphabetically. Ratio of rate ratios highlighted with bold text and a dark grey box are statistically significant ( $p < 0.05$ ). Panel J includes precipitants from propafenone to sitagliptin.

Figure S6. Continued.

K

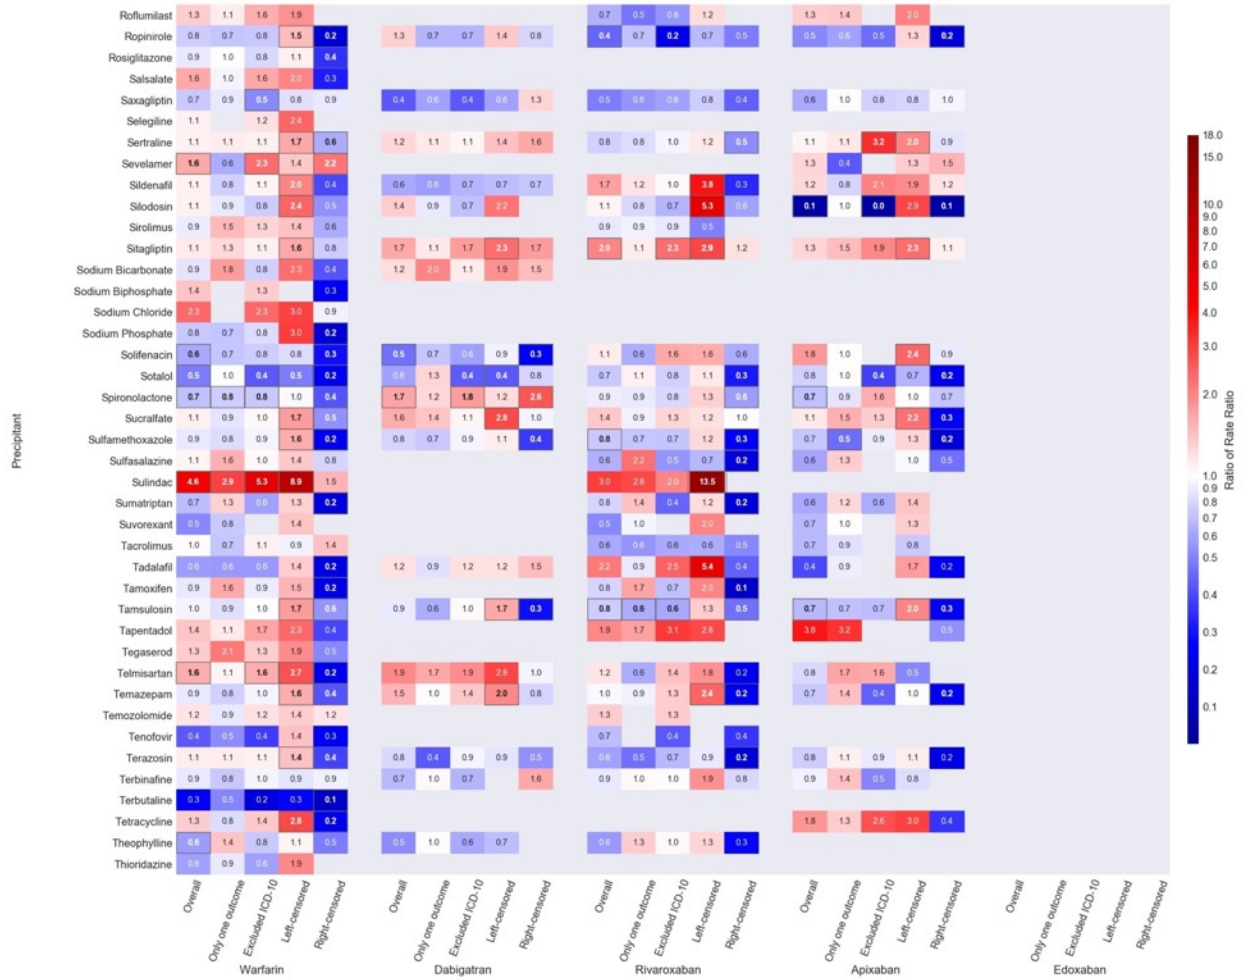

Precipitants are listed alphabetically. Ratio of rate ratios highlighted with bold text and a dark grey box are statistically significant (p < 0.05). Panel K includes precipitants from sodium bicarbonate to tramadol.

Figure S6. Continued.

L

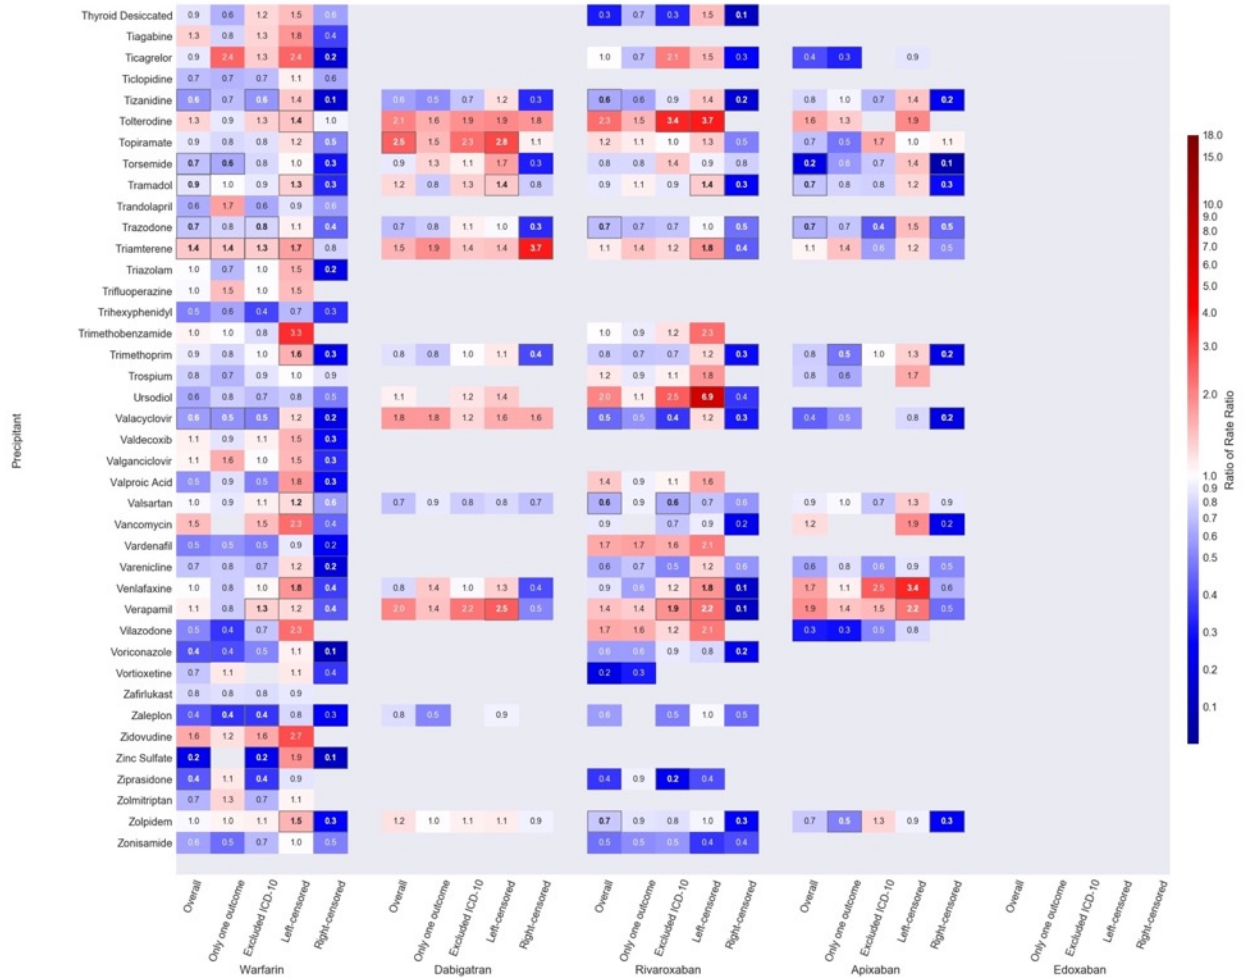

Precipitants are listed alphabetically. Ratio of rate ratios highlighted with bold text and a dark grey box are statistically significant (p < 0.05). Panel L includes precipitants from trandolapril to zonisamide.
